# NLGC: Network Localized Granger Causality with Application to MEG Directional Functional Connectivity Analysis

Behrad Soleimani<sup>a,b,\*</sup>, Proloy Das<sup>c</sup>, I.M. Dushyanthi Karunathilake<sup>a,b</sup>, Stefanie E. Kuchinsky<sup>d,†</sup>,  
Jonathan Z. Simon<sup>a,b,e</sup>, Behtash Babadi<sup>a,b,\*</sup>

<sup>a</sup>*Department of Electrical and Computer Engineering, University of Maryland, College Park, MD, USA*

<sup>b</sup>*Institute for Systems Research, University of Maryland, College Park, MD, USA*

<sup>c</sup>*Department of Anesthesia, Critical Care and Pain Medicine, Massachusetts General Hospital, Boston, MA, USA*

<sup>d</sup>*Audiology and Speech Pathology Center, Walter Reed National Military Medical Center, Bethesda, MD, USA*

<sup>e</sup>*Department of Biology, University of Maryland College Park, MD, USA*

---

## Abstract

Identifying the directed connectivity that underlie networked activity between different cortical areas is critical for understanding the neural mechanisms behind sensory processing. Granger causality (GC) is widely used for this purpose in functional magnetic resonance imaging analysis, but there the temporal resolution is low, making it difficult to capture the millisecond-scale interactions underlying sensory processing. Magnetoencephalography (MEG) has millisecond resolution, but only provides low-dimensional sensor-level linear mixtures of neural sources, which makes GC inference challenging. Conventional methods proceed in two stages: First, cortical sources are estimated from MEG using a source localization technique, followed by GC inference among the estimated sources. However, the spatiotemporal biases in estimating sources propagate into the subsequent GC analysis stage, may result in both false alarms and missing true GC links. Here, we introduce the Network Localized Granger Causality (NLGC) inference paradigm, which models the source dynamics as latent sparse multivariate autoregressive processes and estimates their parameters directly from the MEG measurements, integrated with source localization, and employs the resulting parameter estimates to produce a precise statistical characterization of the detected GC links. We offer several theoretical and algorithmic innovations within NLGC and further examine its utility via comprehensive simulations and application to MEG data from an auditory task involving tone processing from both younger and older participants. Our simulation studies reveal that NLGC is markedly robust with respect to model mismatch, network size, and low signal-to-noise ratio, whereas the conventional two-stage methods result in high false alarms and mis-detections. We also demonstrate the advantages of NLGC in revealing the cortical network-level characterization of neural activity during tone processing and resting state by delineating task- and age-related connectivity changes.

*Keywords:* MEG, Granger causality, source localization, statistical inference, functional connectivity analysis, auditory processing

---

## 33 1. Introduction

34 Characterizing the directed connectivity among different cortical areas that underlie brain function is  
35 among the key challenges in computational and systems neuroscience, as it plays a key role in revealing  
36 the underlying mechanism of cognitive and sensory information processing (Sporns, 2014; Lochmann and  
37 Deneve, 2011). A remarkable data-driven methodology for statistical assessment of directed connectivity is  
38 commonly referred to as *Granger causality*, which quantifies the flow of information based on improvement  
39 in the temporal predictability of a time-series given the history of another one (Bressler and Seth, 2011).  
40 Mathematically speaking, for two time series  $x_{1,t}$  and  $x_{2,t}$ , if using the history of  $x_{1,t}$  can significantly  
41 improve the prediction of  $x_{2,t}$ , we say that there is a Granger causal (GC) link from  $x_{1,t}$  to  $x_{2,t}$ , i.e.,  $x_1 \mapsto x_2$ ;  
42 otherwise, there is no GC link from  $x_1$  to  $x_2$ . An essential attribute of Granger causality distinguishing  
43 it from other connectivity metrics, such as *Pearson correlation* or *mutual information*, is its directionality,  
44 which makes it a powerful statistical tool for brain functional connectivity analysis (Seth et al., 2015).

45 Granger causality has been widely utilized in analyzing functional magnetic resonance imaging (fMRI)  
46 data (Roebroeck et al., 2005; Deshpande et al., 2009; Chen et al., 2018; Dong et al., 2019; Azarmi et al., 2019).  
47 In addition to technical challenges such as hemodynamic variability and ambiguity in the interpretation of  
48 Granger causality analysis for fMRI data (Roebroeck et al., 2011; Deshpande and Hu, 2012), due to the  
49 relatively low temporal resolution of fMRI, on the order of seconds, cortical network interactions that occur  
50 on the millisecond-scale in cognitive and sensory processing cannot be captured. Magnetoencephalography  
51 (MEG) and Electroencephalography (EEG), on the other hand, provide higher temporal resolution in the  
52 order of milliseconds, but unlike fMRI, only provide low-dimensional linear mixtures of the underlying neural  
53 sources. Typically, the number of sensors and sources are in the order of  $\sim 10^2$  and  $\sim 10^4$ , respectively,  
54 which makes the problem of estimating cortical sources highly ill-posed (Hämäläinen and Ilmoniemi, 1994;  
55 Baillet et al., 2001; Hauk et al., 2019; Samuelsson et al., 2020). To address this issue, existing methods  
56 typically follow a two-stage procedure, in which the neuromagnetic inverse problem is solved first to obtain  
57 sources estimates, followed by connectivity analysis performed on the estimated sources (Schoffelen  
58 and Gross, 2009; Sohrabpour et al., 2016; Brookes et al., 2016; Cope et al., 2017; Farokhzadi et al., 2018;  
59 Seymour et al., 2018; Blanco-Elorrieta et al., 2018; Liu et al., 2019, 2020; Rosenberg et al., 2021; Lu et al.,  
60 2013; Hejazi and Nasrabadi, 2019; Gao et al., 2020).

61 While this two-stage approach is convenient to adopt, it comes with significant limitations. First, Granger

---

\*Corresponding authors

†The identification of specific products or scientific instrumentation is considered an integral part of the scientific endeavor and does not constitute endorsement or implied endorsement on the part of the author, DoD, or any component agency. The views expressed in this article are those of the author and do not reflect the official policy of the Department of Army/Navy/Air Force, Department of Defense, or U.S. Government.

*Email addresses:* [behrad@umd.edu](mailto:behrad@umd.edu) (Behrad Soleimani), [pdas6@mgh.harvard.edu](mailto:pdas6@mgh.harvard.edu) (Proloy Das), [dushk@umd.edu](mailto:dushk@umd.edu) (I.M. Dushyanthi Karunathilake), [stefanie.e.kuchinsky.civ@mail.mil](mailto:stefanie.e.kuchinsky.civ@mail.mil) (Stefanie E. Kuchinsky), [jzsimon@umd.edu](mailto:jzsimon@umd.edu) (Jonathan Z. Simon), [behtash@umd.edu](mailto:behtash@umd.edu) (Behtash Babadi)

causality, as a network-level property, is a second-order spatiotemporal relation between two sources. As such, it requires reliable estimates of second-order moments of cortical source activity. Source localization techniques, however, predominantly use strong priors to combat the ill-posedness of the neuromagnetic inverse problem and thereby to estimate first-order moments of cortical sources with controlled spatial leakage. In addition to the challenges caused by artefactual spatial mixing and mis-localization of the estimated sources, which can readily complicate connectivity analysis (Palva and Palva, 2012), the biases introduced in favor of accurate estimation of first-order source activities typically propagate to the second stage of connectivity analysis and may result not only in mis-detection of pair-wise interactions, but also capturing spurious ones (Palva et al., 2018).

Second, a necessary step in establishing causal relationships among cortical sources entails accurate estimation of their temporal dependencies. Source localization methods using linear and non-linear state-space models address this challenge by modeling source dynamics as multivariate autoregressive processes (Long et al., 2006; Pironcini et al., 2018; Lamus et al., 2012; Hui and Leahy, 2006; Ding et al., 2007; Limpiti et al., 2009; Nalatore et al., 2009; Sekihara et al., 2010; Cheung et al., 2010; Cheung and Van Veen, 2011; Sekihara et al., 2011; Fukushima et al., 2015; Cho et al., 2015). While these methods are able to notably increase the spatiotemporal resolution of the estimated sources, they come with massive computational requirements, especially when the number of sources and the length of the temporal integration window grows (Long et al., 2011; Cheung et al., 2010; Sekihara et al., 2010). Finally, existing methods that address these challenges lack a precise statistical inference framework to assess the quality of the inferred GC links and control spurious detection (Manomaisaowapak et al., 2021).

In this paper, we address the foregoing challenges by introducing the Network Localized Granger Causality (NLGC) inference framework to directly extract GC links at the cortical source level from MEG data, without requiring an intermediate source localization step. We model the underlying cortical source activity as a latent sparse multivariate vector autoregressive (VAR) process. We then estimate the underlying network parameters via an instance of the Expectation-Maximization (EM) algorithm with favorable computational scalability. The estimated network parameters are then de-biased to correct for biases incurred by the sparsity assumption, and used to form a test statistic that allows to detect GC links with high statistical precision. In doing so, we provide a theoretical analysis of the asymptotic distribution of said test statistic. We evaluate the performance of NLGC through comprehensive simulations by comparing it with several two-stage procedures. Our simulation results indeed confirm the expected performance gains of NLGC in terms of reducing spurious GC link detection and high hit rate.

We further examine the utility of NLGC by application to experimentally recorded MEG data from two conditions of pure-tone listening and resting state in both younger and older individuals. We consider two frequency bands of interest, namely, combined Delta and Theta bands (0.1 – 8 Hz) and Beta band (13 – 25 Hz), for GC analysis which have previously yielded age-related changes in resting state coherence

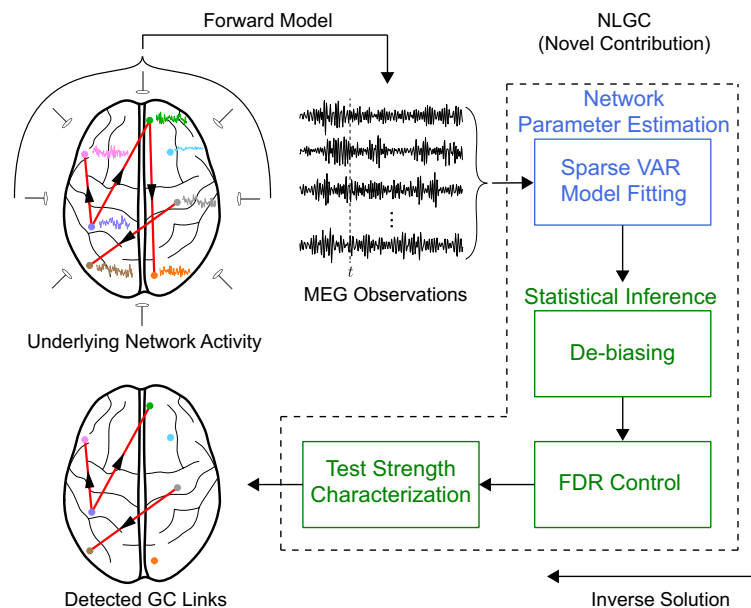

**Figure 1:** A schematic depiction of the proposed NLGC inference. For cortical sources that form an underlying network, our contribution is to directly infer this network, using the framework of Granger, from the MEG measurements. NLGC is composed of network parameter estimation (blue block) and statistical inference (green blocks) modules. Unlike the conventional two-stage methods, NLGC extracts the GC links without an intermediate source localization step.

97 analysis (Fleck et al., 2016). The detected GC networks using NLGC reveal striking differences across  
 98 the age groups and conditions, in directional interactions between frontal, parietal, and temporal cortices.  
 99 Further inspection of these networks reveals notable inter- vs. intra-hemispheric connectivity differences.  
 100 In summary, NLGC can be used as a robust and computationally scalable alternative to existing two-stage  
 101 connectivity analysis approaches used in MEG analysis.

## 102 2. Results

### 103 2.1. Overview of NLGC

104 Here, we give an overview of the proposed NLGC inference methodology, as depicted in Fig. 1, and  
 105 highlight the novel contributions.

106 The sources of the signals recorded by MEG/EEG sensors are mainly the post-synaptic primary currents  
 107 of a bundle of tens of thousands of synchronously active pyramidal cells that form an *effective current dipole*  
 108 (Murakami and Okada, 2006; Hämäläinen et al., 1993; Da Silva, 2009). As such, to formulate the MEG/EEG  
 109 forward model, a distributed cortical source space is considered in which the cortical surface is discretized  
 110 using a mesh comprising a finite number of current dipoles placed at its vertices. These current dipoles are  
 111 henceforth called sources, and their activity as source time-courses.

112 Assuming that there are  $M$  such sources, we denote the collective source activity at discrete time  $t$   
 113 as an  $M$ -dimensional vector  $\mathbf{x}_t$ , where its  $i^{\text{th}}$  element,  $x_{i,t}$  is the activity of source  $i$ , for  $i = 1, 2, \dots, M$

114 and  $t = 1, 2, \dots, T$ , where  $T$  denotes the data duration. The  $N$  MEG sensors measure the  $N$ -dimensional  
115 observation vector  $\mathbf{y}_t$  at time  $t$ . The MEG observations follow a well-known linear forward model given by  
116 (Sarvas, 1987; Mosher et al., 1999; Baillet et al., 2001):

$$117 \quad \mathbf{y}_t = \mathbf{C}\mathbf{x}_t + \mathbf{n}_t, \quad (1)$$

118 where the  $N \times M$  matrix  $\mathbf{C}$  maps the *source space activity* to the *sensor space* and is commonly referred to as  
119 the *lead-field matrix*. The  $N$ -dimensional measurement noise vector  $\mathbf{n}_t$  is modeled as a zero mean Gaussian  
120 random vector with covariance matrix  $\mathbf{R}$  and is assumed to be identically and independently distributed  
121 (i.i.d.) across time (Cheung and Van Veen, 2011; Cheung et al., 2010; Long et al., 2011; Wipf et al., 2010).

122 As for the evolution of the sources, we consider  $\mathbf{x}_t$  as a latent state vector and model its evolution over  
123 time by the following generic stochastic dynamical model:

$$124 \quad \mathbf{x}_t = \sum_{k=1}^K \mathbf{A}_k \mathbf{x}_{t-k} + \mathbf{w}_t, \quad t = 1, \dots, T, \quad (2)$$

125 where the  $M$ -dimensional vectors  $\mathbf{w}_t$  are assumed to be i.i.d. zero mean Gaussian random vectors with  
126 unknown diagonal covariance matrix  $\mathbf{Q} = \text{diag}(\sigma_1^2, \dots, \sigma_M^2)$  and independent of  $\mathbf{v}_t$ . The  $M \times M$  coefficient  
127 matrix  $\mathbf{A}_k$  quantifies the contribution of the neural activity from time  $t - k$  to the current activity at time  
128  $t$ , for  $k = 1, \dots, K$ . This dynamical model is conventionally called a Vector Autoregressive (VAR) model of  
129 order  $K$  (or VAR( $K$ )) and is commonly used in time-series analysis (Johansen, 1995).

130 Assuming that the source time-series  $\mathbf{x}_t$  form an underlying network (Fig. 1, top left), our main con-  
131 tribution is to find the inverse solution to this latent network, in a Granger causality sense, directly from  
132 the MEG observations  $\mathbf{y}_t$  (Fig. 1, bottom left). If reliable estimates of the network parameters  $\{\hat{\mathbf{A}}_k\}_{k=1}^K$   
133 were at hand, one could perform a statistical assessment of causality from source  $j$  to  $i$  by checking whether  
134  $[\hat{\mathbf{A}}_k]_{i,j} = 0$  for all  $k = 1, 2, \dots, K$  (i.e., no causal link) or  $[\hat{\mathbf{A}}_k]_{i,j} \neq 0$  for at least one of  $k = 1, 2, \dots, K$  (i.e.,  
135 causal link). However, reliable estimation of the network parameters based on noisy and low-dimensional  
136 measurements  $\mathbf{y}_t$  of typically short duration is not straightforward. When noisy, but direct, observations of  
137 the sources are available, statistical methods such as LASSO are typically used to test for these hypotheses;  
138 however, when the number of sources  $M$  and lags  $K$  are large, such methods suffer from the large number  
139 of statistical comparisons involved.

140 The classical notion of Granger causality circumvents this challenge by considering the "bulk" effect of  
141 the history of one source on another in terms of temporal predictability. To this end, for testing the GC  
142 link from source  $j$  to source  $i$ , two competing models are considered: a *full model*, in which all sources are  
143 considered in Eq. (2) to estimate the network parameters and thereby predict source  $i$ ; and a *reduced* model,  
144 in which the coefficients from source  $j$  to  $i$  are removed from Eq. (2), followed by estimating the network  
145 parameters and predicting source  $i$ . The log-ratio of the prediction error variance between the reduced and

146 full models is used as the Granger causality measure. In other words, the better the prediction of the full  
147 model compared to the reduced model, the more likely that source  $j$  has a causal contribution to the activity  
148 of source  $i$ , in the sense of Granger causality.

149 Considering the inverse problem of Fig. 1, there are several key challenges. First, unlike the classical GC  
150 inference frameworks, the sources are not directly observed, but only their low-dimensional and noisy sensor  
151 measurements are available. Second, GC inference inherently demands single-trial analysis, but the trial  
152 duration of cognitive and sensory experiments are typically short, which renders reliable model parameter  
153 estimation difficult. Finally, testing the improvement of the full model over the reduced model requires a  
154 precise statistical characterization to limit false detection of GC links.

155 Existing methods mostly treat these challenges separately, by operating in a two-stage fashion: a source  
156 localization procedure is first performed to estimate the sources, followed by performing parameter estimation  
157 and conventional GC characterization. However, source localization techniques use specific priors that aim at  
158 combating the ill-posed nature of the neuromagnetic inverse problem and thereby bias the source estimates  
159 in favor of *spatial* sparsity or smoothness (Lamus et al., 2012; Krishnaswamy et al., 2017; Babadi et al.,  
160 2014; Wipf et al., 2010; Sohrabpour et al., 2016; Gramfort et al., 2013b). As such, the network parameters,  
161 which inherently depend on second-order current source moments, are recovered from these biased first-order  
162 source estimates and thus incur significant errors that complicate downstream statistical analyses.

163 In contrast, NLGC aims at addressing these challenges jointly and within a unified inference framework.  
164 The resulting solution is composed of a network parameter estimation module, in which the VAR model  
165 parameters  $\{\mathbf{A}_k\}_{k=1}^K$  are estimated directly from the MEG data by assuming sparse *interactions* among  
166 the sources, as opposed to the commonly-used *spatial* sparsity assumption. As such, the biases induced  
167 by this approach only effect the VAR coefficients, and not the spatiotemporal distribution of the sources.  
168 Furthermore, we account for these biases in the statistical inference module of NLGC: a de-biasing block  
169 is used to correct for biases incurred by sparse VAR estimation, a false discovery rate (FDR) control block  
170 is used to correct for multiple comparisons, and a test strength characterization block assigns a summary  
171 statistic in the range of  $[0, 1]$  to each detected link, denoting the associated statistical test power (i.e.,  
172 Youden’s  $J$ -statistic).

173 While the building blocks that form NLGC are individually well-established in statistical inference liter-  
174 ature, including but not limited to Granger causal inference from directly observable states (Bolstad et al.,  
175 2011; Endemann et al., 2022) and state-space model parameter estimation (Cheung et al., 2010; Nalatore  
176 et al., 2009; Sekihara et al., 2010; Pirondini et al., 2018), our contribution is to unify them within the same  
177 framework and specializing them to the problem of direct GC inference from MEG observations. To this  
178 end, our technical contributions include: 1) developing a scalable sparse VAR model fitting algorithm by  
179 leveraging steady-state approximations to linear Gaussian state-space inference, sparse model selection, and  
180 low-rank approximations to the lead field matrix (Sections 4.4.1, 4.5.1, 4.5.2 and Appendix A); and 2) pro-

181 viding a theoretical analysis characterizing the asymptotic distribution of a carefully designed test statistic,  
 182 namely the de-biased deviance difference, that allows both FDR correction and test strength characterization  
 183 (Theorem 1 in Section 4.4.3 and Appendix B).

## 184 2.2. An Illustrative Simulation Study

185 We first present a simple, yet illustrative, simulated example to showcase how the main components  
 186 of NLGC work together to address the shortcomings of two-stage approaches. Consider  $M = 84$  cortical  
 187 patches, within which patches 1 through 8 are active and forming a VAR(5) network as shown in Fig.  
 188 2A, and the rest are silent (See Section 4.5.1 for details of source space construction). The ground truth  
 189 GC map of a subset of sources, indexed from 1 through 15, are shown in Fig. 2B (top left) for visual  
 190 convenience. The  $(i, j)$  element of the GC matrix indicates the GC link ( $j \mapsto i$ ). The time courses of the  
 191 cortical patch activities are observed through a random mixing matrix (each element is independently drawn  
 192 from a standard normal distribution) corresponding to  $N = 155$  sensors for three trials of duration  $T = 1000$   
 193 samples each. To simulate the MEG observations, we used one lead-field per cortical patch for simplicity.  
 194 The detailed parameter settings for this simulation study are given in Section 4.8.1.

195 We compare the performance of NLGC to two baseline two-stage methods composed of an initial source  
 196 localization stage via the Minimum Norm Estimate (MNE) algorithm, followed by VAR model fitting via  
 197 either 1) least squares with no sparsity assumption, and 2)  $\ell_1$ -norm regularized least squares to capture

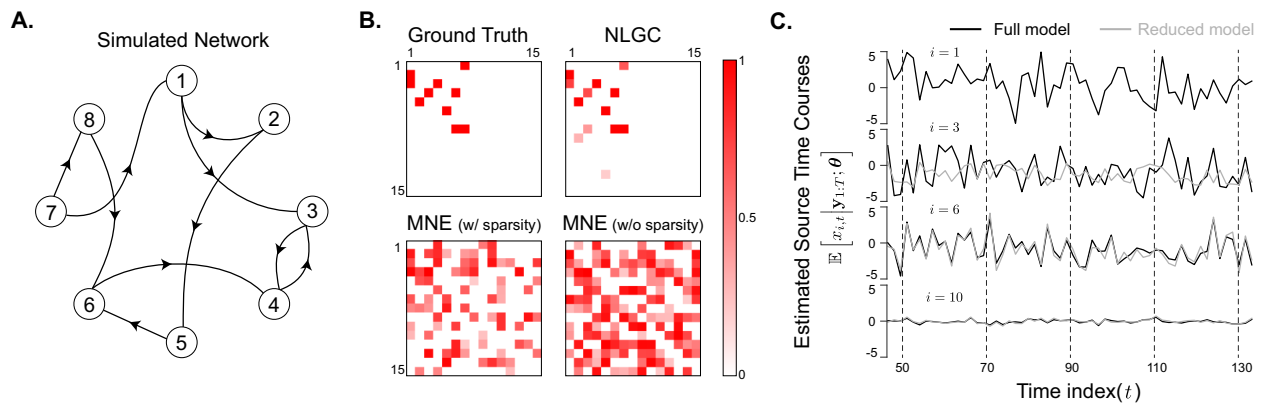

**Figure 2:** An illustrative simulated example. **A.** The underlying true GC network between the active sources indexed by  $1, 2, \dots, 8$  (explaining 90% of the power of the 84 sources). The remaining 76 sources are silent and are modeled as independent white noises accounting for the remaining 10% of the source power. **B.** The ground truth and estimated GC maps using NLGC and MNE (with and without accounting for sparsity). Only a subset of sources indexed by  $1, 2, \dots, 15$  are shown for visual convenience. NLGC fully captures the true links with only a few false detection; on the other hand, the two-stage approaches using MNE, capture around half of the true links, but also detect numerous spurious links. While enforcing sparsity mildly mitigates the false alarm performance of the two-stage approach, it is unable to resolve it. **C.** Estimated activity time-courses of the patches with index 1, 3, 6, and 10 based on full models and the reduced models corresponding to the GC link ( $1 \mapsto 3$ ) and non-GC links ( $1 \mapsto 6$ ) and ( $1 \mapsto 10$ ) as examples. As expected, since the GC link ( $1 \mapsto 3$ ) exists, removing the 1<sup>st</sup> patch contribution from the VAR model of the 3<sup>rd</sup> patch dramatically changes the predicted activity of patch 3 (second line). However, this is not the case for the other two examples, since the links ( $1 \mapsto 6$ ) and ( $1 \mapsto 10$ ) do not exist (third and fourth lines).



198 sparse parameters, similar to that used in NLGC. The details of the VAR model fitting given the source  
199 estimates are presented in Appendix A.3.

200 Fig. 2B shows the  $J$ -statistics corresponding to the detected GC links for NLGC and the two baseline  
201 methods based on MNE. Note that a  $J$ -statistic near 1 interprets as a detection with both high sensitivity  
202 and specificity, and a  $J$ -statistic near 0 corresponds to either low sensitivity or specificity, or both. As it  
203 can be seen in Fig. 2B, NLGC not only captures the true links, but also only detects a negligible number  
204 of false links. On the other hand, the two-stage methods based on MNE only detect about half of the true  
205 links and suffer from numerous spurious links. Note that while enforcing sparsity in the two-stage method  
206 seems to mitigate the number of spurious links (Fig. 2B, bottom left) compared to the two-stage method  
207 with no sparsity (Fig. 2B, bottom right), the errors incurred in the first stage of source localization can not  
208 be corrected through the second stage of parameter estimation.

209 Fig. 2C shows the expected value of estimated cortical patch activities corresponding to the full and  
210 reduced models of 4 cortical patches (indexed by 1, 3, 6, and 10). Since the GC link ( $1 \mapsto 3$ ) exists, in the  
211 corresponding reduced model, i.e., when the contribution of the 1<sup>st</sup> cortical patch (shown in the first line) is  
212 removed from the VAR model of the 3<sup>rd</sup> cortical patch, the activity of cortical patch 3 is highly suppressed  
213 (second line, gray trace) compared to that of the full model (second line, black trace). On the other hand,  
214 for cortical patches 6 and 10, since none of the GC links ( $1 \mapsto 6$ ) and ( $1 \mapsto 10$ ) exist, including or excluding  
215 the 1<sup>st</sup> patch in their VAR model does not effect their prediction accuracy and as a result, their estimated  
216 activity time-courses for both the full and reduced models are similar (third and fourth lines).

217 The results so far validate the superior performance of the first component of NLGC, i.e., network  
218 parameter estimation. As for the second component, statistical inference, a key theoretical result of this  
219 work is to establish the asymptotic distribution of a test statistic called the *de-biased deviance difference*  
220 between the full and reduced models of a link ( $i \mapsto j$ ), denoted by  $\mathcal{D}_{(i \mapsto j)}^{db}$ . In Theorem 1, we establish that if  
221 a GC link from cortical patch  $i$  to  $j$  does not exist, the corresponding test statistic  $\mathcal{D}_{(i \mapsto j)}^{db}$  is asymptotically  
222 chi-square distributed, and if the GC link exists,  $\mathcal{D}_{(i \mapsto j)}^{db}$  is distributed according to a non-central chi-square.

223 Here we empirically examine this theoretical result for the foregoing simulation. Consider the links  
224 ( $7 \mapsto 1$ ) and ( $7 \mapsto 4$ ) which are GC and non-GC, respectively. We generated 200 different realizations  
225 of the VAR processes with the same parameters and compared the empirical distribution of the de-biased  
226 deviance corresponding to these two links with their theoretical distribution obtained by Theorem 1. Fig.  
227 3A illustrates the close match between empirical and theoretical distributions of  $\mathcal{D}_{(7 \mapsto 1)}^{db}$  and  $\mathcal{D}_{(7 \mapsto 4)}^{db}$ . Based  
228 on Theorem 1, for the non-GC link ( $7 \mapsto 4$ ), the de-biased deviance has a central  $\chi^2(5)$  distribution. On  
229 the other hand, the de-biased deviance of the GC link ( $7 \mapsto 1$ ) is distributed according to a non-central  
230  $\chi^2(5, 61.4)$ .

231 In Fig. 3B, the histogram of the de-biased deviance differences corresponding to all links within the  
232 subset of sources indexed from 1 through 15 is plotted for three different realizations of the VAR processes



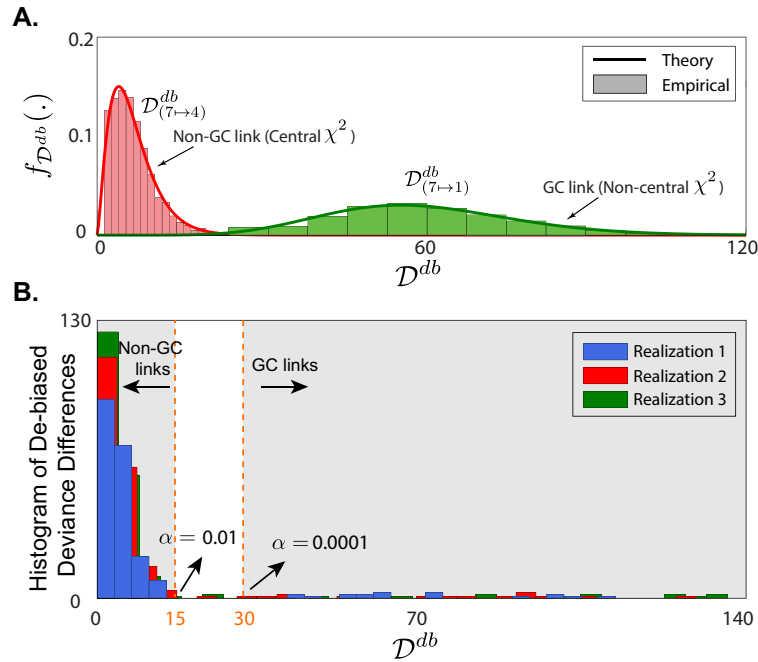

**Figure 3:** Empirical validation of Theorem 1. **A.** Theoretical and empirical distributions of the de-biased deviance differences corresponding to the GC link ( $7 \mapsto 1$ ) and non-GC link ( $7 \mapsto 4$ ) from the setting of Fig. 2. The empirical distributions closely match the theoretical predictions of Theorem 1. **B.** Histogram of the de-biased deviance differences of all possible links between the first 15 sources for three different realizations of the VAR processes with the same parameters and for two significance levels  $\alpha = 0.01$  and  $0.0001$ . The de-biased deviance differences show a clear delineation of the significant GC links (to the right of the dashed vertical lines) and insignificant ones (to the left of the dashed vertical lines), while exhibiting robustness to the choice of the significance level.

233 with the same parameters as before. Depending on the threshold  $\alpha$  for rejecting the null hypothesis to  
 234 detect a GC link, one can obtain an equivalent threshold for  $\mathcal{D}_{(i \rightarrow j)}^{db}$ . In Fig. 3B, two thresholds are shown  
 235 with dashed lines for  $\alpha = 0.01$  and  $0.0001$ . It is noteworthy that most of de-biased deviance differences  
 236 corresponding to the true GC links lie on the right hand side of the dashed lines for both thresholds and for  
 237 the three realizations, suggesting robustness of GC link detection framework. On the other hand, most of  
 238 the possible GC links are non-existent in our simulation setting, which results in the concentration of most  
 239 of the de-biased deviance difference values to the left of the dashed lines, and hence few false detections  
 240 as shown in Fig. 2B. In NLGC, we further leverage this virtue by using an FDR correction procedure to  
 241 control the overall false discovery rate at a target level.

### 242 2.3. Simulated MEG Data Using a Head-Based Model

243 We next present a more realistic and comprehensive simulation to evaluate the performance of NLGC and  
 244 compare it with other two-stage approaches based on a number of different source localization techniques.  
 245 In addition, we consider the effect of signal-to-noise (SNR) ratio and model mismatch on the performance of  
 246 the different algorithms. The latter is an important evaluation component, as model mismatch is inevitable

247 in practice due to co-registration errors between MR scans and MEG sensors as well as the choice of the  
248 distributed cortical source model.

249 As for the baseline methods, we consider two-stage GC detection schemes in which the source localization  
250 is performed by either the classical MNE (Hämäläinen and Ilmoniemi, 1994) and Dynamic Statistical Para-  
251 metric Mapping (dSPM) (Dale et al., 2000) methods, or the more advanced Champagne algorithm (Wipf  
252 et al., 2010). As for the VAR fitting stage, we use the same  $\ell_1$ -regularized least squares scheme that is  
253 utilized by NLGC, to ensure fairness (See Appendix A.3).

254 In order to create realistic test scenarios for assessing the robustness of the different algorithms, we  
255 consider four cases with attributes defined by the presence vs. absence of source model mismatch, and exact  
256 vs. relaxed link localization error:

257 *Source Model Mismatch.* As it is described in detail in Section 4.5.1, in order to reduce the computational  
258 complexity of NLGC, we utilize low-rank approximations to the lead field matrix by grouping dipoles over  
259 *cortical patches* and summarizing their contribution using singular value decomposition (SVD) to reduce  
260 the column-dimension of the lead-field matrix. Let  $r_{\text{gen.}}$  be the number of SVD components used for each  
261 cortical patch to generate the simulated MEG data, and let  $r_{\text{est.}}$  be the number of SVD components used  
262 in the GC detection algorithms. Clearly, if  $r_{\text{est.}} = r_{\text{gen.}}$ , the forward model matches the ones used in the  
263 inverse solution, so there is no model mismatch. However, if  $r_{\text{est.}} < r_{\text{gen.}}$ , some modes of activity in the  
264 simulated data cannot be captured by the inverse solution, thus creating a mismatch between the forward  
265 and inverse models. We note that this notion of model mismatch pertains to lack of spatial resolution in  
266 the inverse model as compared to the forward model. As such, it does not account for the misalignment of  
267 the lead-fields with respect to the anatomy, but instead captures the spatial resolution limitation incurred  
268 by the choice of the source space used in the inverse solution.

269 *Link Localization Error.* Suppose that the GC link ( $i \mapsto j$ ) exists. If in the GC detection algorithm,  
270  $i$  is mis-localized to  $i' \neq i$  or  $j$  is mis-localized to  $j' \neq j$ , the link is considered a miss under the exact  
271 link localization error criterion. Let  $N(k)$  be the 6 nearest neighbors of a source  $k$ . Under the *relaxed* link  
272 localization error, if  $i' \in N(i)$  and  $j' \in N(j)$ , we associate ( $i' \mapsto j'$ ) to the correct link ( $i \mapsto j$ ) and consider  
273 it a hit. This way, small localization errors, potentially due to errors in the head model or the underlying  
274 algorithms can be tolerated.

275 The source space is again composed of  $M = 84$  cortical patches whose activity is mapped to  $N = 155$   
276 MEG sensors using a real head model from one of the subjects in the study. For more details on the  
277 parameter settings for this study, see Section 4.8.2. Fig. 4A shows the ground truth GC network and  
278 the estimated ones using NLGC and two-stage methods using MNE, dSPM, and Champagne when  $m = 10$   
279 patches are active. In this case, NLGC detected no spurious links and missed only 3 of the true GC links.  
280 On the other hand, even though MNE, dSPM and Champagne capture almost all true GC links, they suffer  
281 from a considerable number of falsely detected GC links.

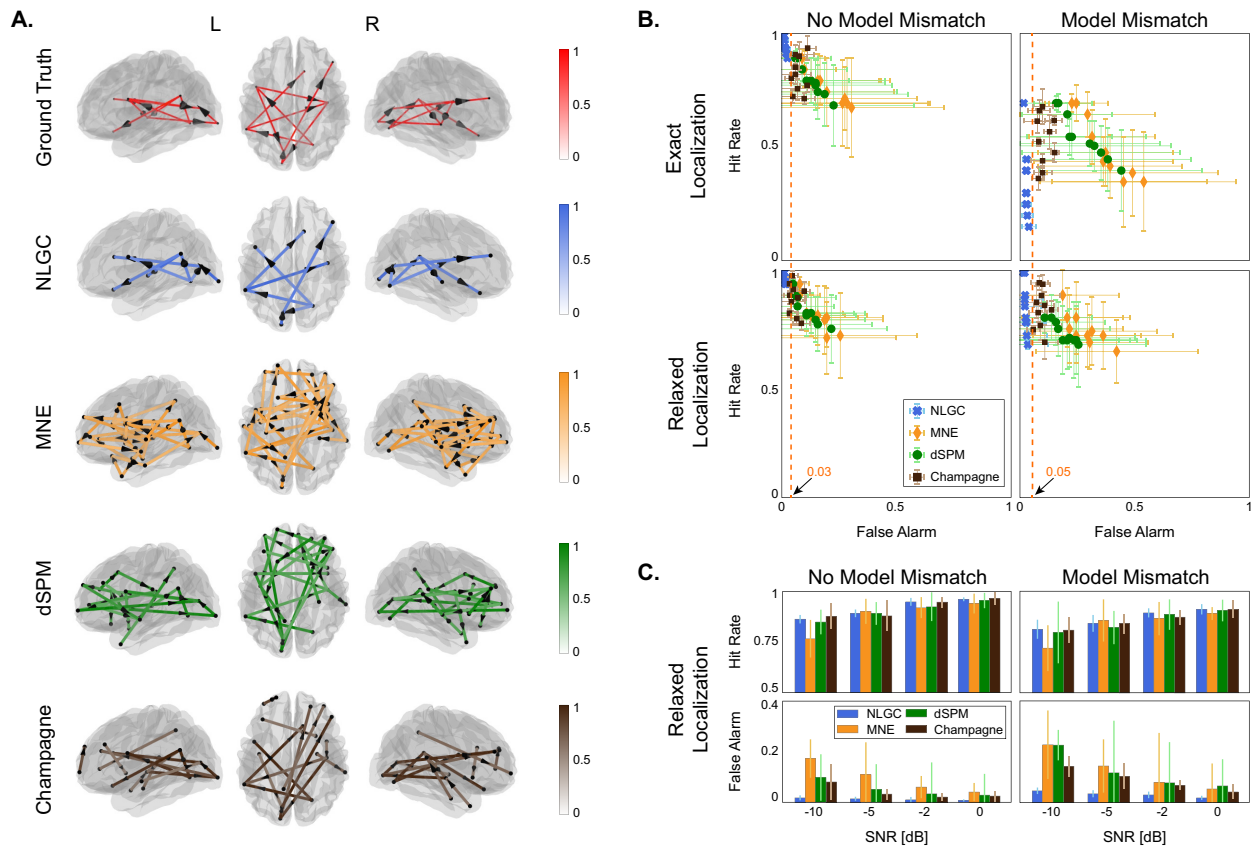

**Figure 4:** Comparison of NLGC with two-stage procedures using a realistic simulation setting. **A.** Example of the ground truth GC network, and estimates obtained by NLGC and two-stage approaches based on MNE, dSPM, and Champagne overlaid on dorsal and lateral brain plots, with  $m = 10$  active patches. NLGC captures nearly all the existing GC links with no spurious detection, whereas the other three methods suffer from significant false detection. **B.** ROC curves (hit rate vs. false alarm) corresponding to NLGC, and two-stage approaches based on MNE, dSPM, and Champagne for exact/relaxed link localization and in the presence/absence of model mismatch. Each point corresponds to simulating data based on  $m$  active patches averaged over 10 different realization with randomly assigned source locations, for  $m = 2, 4, \dots, 20$ . NLGC provides equal or better hit rate, while consistently maintaining low false alarm rate. **C.** Evaluating the effect of SNR for an example setting of  $m = 12$  active patches in presence/absence of model mismatch. While the hit rate of NLGC is comparable or better than the other algorithms, it consistently maintains low false alarm rates across a wide range of SNR settings.

282 To quantify this further, Fig. 4B shows the receiver operating characteristic (ROC) curves correspond-  
 283 ing to the different methods for exact vs. relaxed link localization and presence vs. absence of model  
 284 mismatch. Each point is obtained by varying the number of active patches  $m$  in the simulation in the range  
 285  $m = 2, 4, \dots, 20$  and averaging the performance of each method over 10 independent trials with randomly  
 286 allocated patch locations. The 95% quantiles for the hit and false alarm rates are shown as vertical and  
 287 horizontal bars, respectively. In the absence of source model mismatch (left columns), NLGC outperforms  
 288 the other three methods in terms of both hit and false alarm rates. The gap between NLGC and the other  
 289 methods widens when there is source model mismatch (right column, top panel). While the hit rate of NLGC  
 290 degrades using the exact localization criterion, it remarkably maintains a false alarm rate of  $< 5\%$ , whereas

291 the other algorithms exhibit false alarm rates as high as  $\sim 50\%$ . By using the relaxed link localization error  
292 criterion (bottom plots), the hit rate of NLGC becomes comparable or better than the other three methods,  
293 while it still maintains its negligible false alarm rate. Moreover, the corresponding vertical and horizontal  
294 errors bars for NLGC are considerably smaller than the other three algorithms, suggesting the robustness  
295 of NLGC to the location of the active patches used for different trials.

296 Finally, in Fig. 4C, the hit and false alarm rates are plotted for varying levels of SNR in the range  
297  $\{0, -2, -5, -10\}$  dB. The performance is averaged over 10 trials for  $m = 12$  active patches. As the SNR  
298 reduces, even though the performance of all four methods becomes similar in terms of the hit rate, NLGC  
299 maintains its low false alarm rate whereas the other algorithms exhibit considerably high rates of false alarm.

300 Overall, while NLGC achieves comparable hit rate to the other three methods, it maintains consistently  
301 low false alarm rates over a wide range of the simulation parameter space. This is a highly desirable virtue,  
302 as false detection is the main pitfall of any connectivity analysis methodology. Thus, this simulation study  
303 corroborates our assertion that NLGC is a reliable alternative to existing two-stage approaches.

#### 304 *2.4. Application to Experimentally Recorded MEG Data*

305 We next consider application to MEG data from auditory experiments involving both younger and older  
306 subjects (the data used here is part of a larger experiment whose results will be reported separately). The  
307 MEG data corresponds to recordings from 22 subjects, 13 younger adults (5 males; mean age 21.1 years,  
308 range 17–26 years) and 9 older adults (3 males; mean age 69.6 years, range 66–78 years). Resting state  
309 data were recorded before and after the main auditory task, each 90 s long in duration. During the resting  
310 state condition, subjects with eyes open fixated at a red cross at the center of a grey screen. Just before the  
311 first resting state recording, 100 repetitions of 500 Hz tone pips were presented, during which the subjects  
312 fixated on a cartoon face image at the center of the screen and were asked to silently count the number of  
313 tone pips. The tones were presented at a duration of 400 ms with a variable interstimulus interval (1400,  
314 1200, and 1000 ms). The task was around 150 s long, from which two segments, each 40 s long in duration,  
315 were used for analysis. More details on the experimental setting is given in Section 4.6.

316 In order to assess the underlying cortical networks involved in tone processing and compare them with  
317 the resting state, we further considered two key frequency bands of interest (Shafiei et al., 2021), namely  
318 the combined Delta and Theta bands (0.1–8 Hz), here called Delta+Theta band, and the Beta band (13–  
319 25 Hz). Since the goal is to capture the (age-related) differences across tone listening versus resting state  
320 conditions, we combined the Delta and Theta bands for simplicity of our analysis, as they are both shown  
321 to be primarily involved in auditory processing (Baar et al., 2001). In addition, to structure our analysis in  
322 an interpretable fashion, we considered the frontal, temporal, and parietal regions of interest (ROIs) in each  
323 hemisphere, which are known to play key roles in auditory processing and to change with age (Kuchinsky  
324 and Vaden, 2020).

325 *NLGC for the Delta+Theta Band (0.1 – 8 Hz)*. Fig. 5A shows the detected GC links between frontal (F)  
326 and temporal (T) areas overlaid on the dorsal brain view, for the tone processing vs. resting state conditions  
327 and separately for the younger and older subjects. The group average of the detected links across younger  
328 and older participants are shown on the left and those of two representative individuals (one younger and  
329 one older) are shown on the right. Note that the links involving parietal areas are not shown for the sake of  
330 visual convenience. As it can be seen from both the group average and individual-level plots, the top-down  
331 links from frontal to temporal areas (red arrows) have a higher contribution to tone processing (first and  
332 third columns) compared to resting state (second and fourth columns) for both younger and older adults.  
333 On the other hand, more bottom-up links from temporal to frontal areas (green arrows) are detected in the  
334 resting state as compared to the tone processing condition.

335 In Fig. 5B, the average normalized  $J$ -statistics of the detected GC links between the frontal, temporal  
336 and parietal (P) ROIs are shown as color-weighted edges in a directed graph. For instance, the arrows  
337 between temporal and frontal areas, enclosed in dashed ovals, show the normalized average of the arrows  
338 shown in the first two columns of Fig. 5A. In addition to the notable change of connectivity between  
339 temporal and frontal areas, i.e., from dominantly bottom-up under resting state to dominantly top-down  
340 under tone processing, there are several other striking changes both across conditions and age groups. First,  
341 from tone processing to the resting state condition, for both age groups, the contribution of outgoing links  
342 from frontal to parietal and temporal areas drops. Secondly, in the resting state condition, incoming GC  
343 links from parietal and temporal to frontal areas increase. Finally, frontal to frontal interactions become  
344 more prevalent in the resting state condition, for both younger and older subjects.

345 To further quantify these observations, Fig. 5C summarizes statistical test results for comparing the  
346 detected link counts for the different connectivity types and across age groups. Interestingly, no significant  
347 difference between younger and older participants is detected in either of the conditions. Within each age  
348 group, however, several significant changes are detected. In particular, the aforementioned visual observa-  
349 tions from Fig. 5B are indeed statistically significant: the top-down frontal to temporal connectivity under  
350 tone processing switches to bottom-up temporal to frontal connectivity; outgoing links from the frontal to  
351 temporal/parietal areas are significantly increased under tone listening compared to resting state; parietal  
352 to frontal connections have more contribution in the resting state compared to tone processing; and frontal  
353 to frontal connections increase in the resting state, as previously reported in the literature (Müller et al.,  
354 2009; Di Liberto et al., 2018; Henry et al., 2017).

355 We further inspected the inter- vs. intra-hemispheric contributions of the aforementioned changes, as  
356 shown in Fig. 6, where we have combined the older and younger subject pools, given that no significant  
357 age difference was detected. In the resting state, the inter- and intra-hemispheric networks are similar  
358 (Fig. 6A, right column). However, there are several interesting changes in the inter- vs. intra-hemispheric  
359 networks under tone processing (Fig. 6A, left column), such as the increased involvement of intra-hemispheric

## Delta + Theta Band (0.1-8 Hz) Connectivity

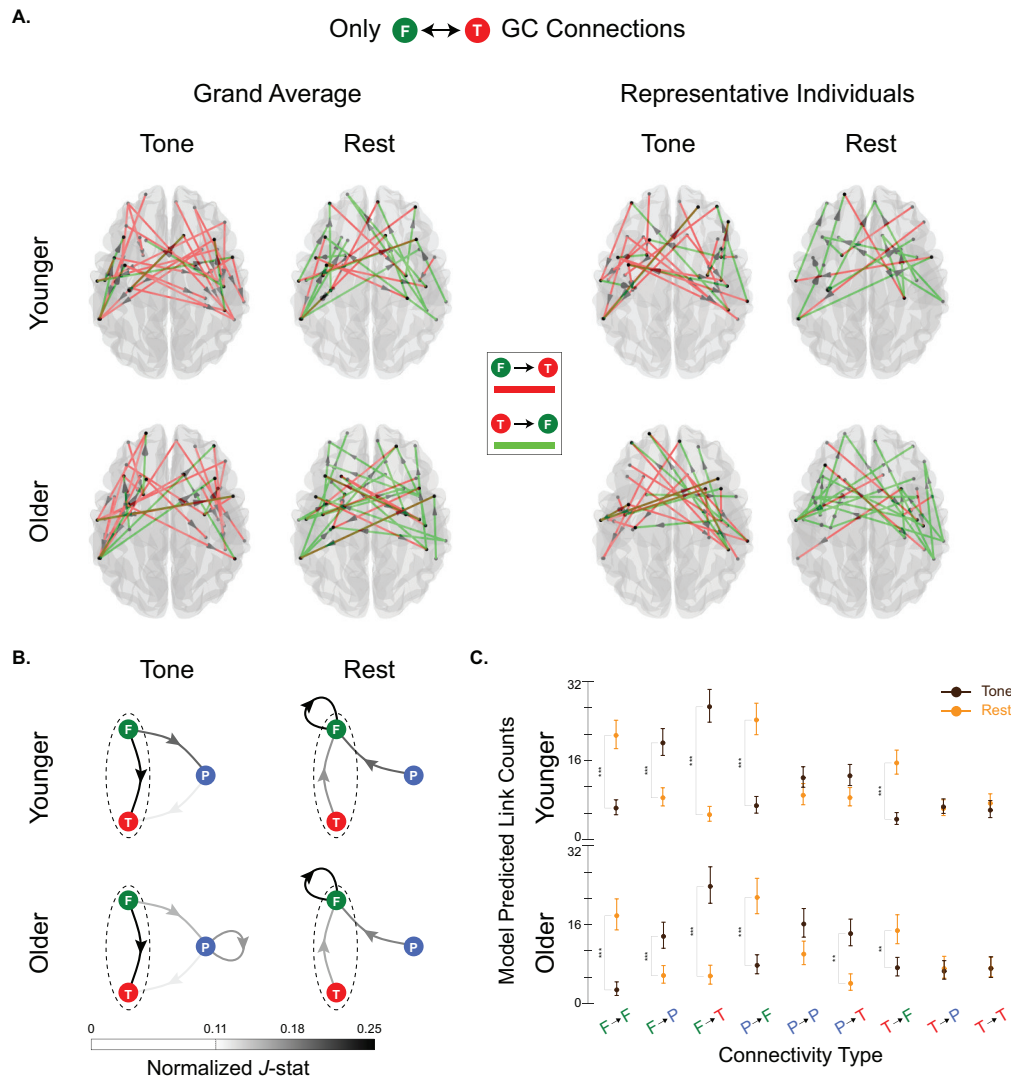

**Figure 5:** NLGC analysis of experimentally recorded MEG data in the Delta+Theta band (0.1 – 8 Hz). **A.** Extracted GC links between frontal and temporal areas overlaid on dorsal brain plots for younger (top row) and older (bottom row) participants. The first two columns correspond to the group averages and the last two correspond to two representative participants, for the two task conditions of tone processing (first and third columns) and resting state (second and fourth columns). For the group average plots, only *J*-statistic values greater than 0.75 are shown for visual convenience. There is a notable increase of top-down links from frontal to temporal areas during tone processing (red arrows, first and third columns) as compared to the resting state in which bottom-up links from temporal to frontal areas dominate (green arrows, second and fourth columns). **B.** Normalized *J*-statistics, averaged over subjects within each age group, between frontal, temporal, and parietal areas for tone processing vs. resting state conditions and younger vs. older participants. The dashed ovals indicate the normalized average number of links shown in panel A. There are notable changes across task conditions, including dominantly top-down frontal to temporal/parietal connections during tone processing, in contrast to dominantly bottom-up temporal to frontal connections during resting state. **C.** Statistical testing results showing several significant differences across conditions. No significant age difference is detected in the Delta+Theta band (\*\* $p < 0.001$ ; \*\* $p < 0.01$ ; \* $p < 0.05$ ).



## Delta + Theta Band (0.1-8 Hz) Connectivity

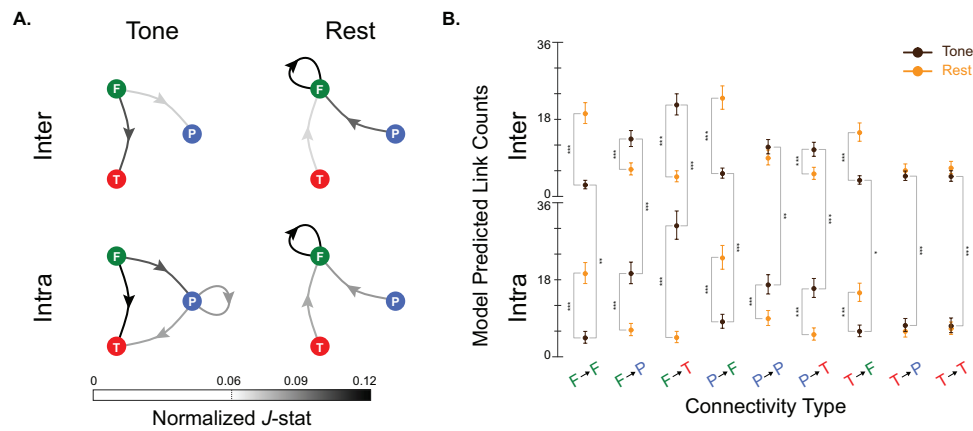

**Figure 6:** Inter- vs. intra-hemispheric refinement of the analysis of experimentally recorded MEG data in the Delta+Theta band (0.1 – 8 Hz). **A.** Normalized  $J$ -statistics, averaged over all subject, between frontal, temporal, and parietal areas for inter-hemispheric and intra-hemispheric connectivity types. Given that no significant age difference was detected, the two age groups are pooled together. While the inter- vs. intra-hemispheric contributions to the detect networks are highly similar under resting state, there notable differences under tone processing, including higher number of intra-hemispheric connections from frontal to parietal and from parietal to temporal areas. **C.** Statistical testing results showing several significant differences across conditions and inter- vs. intra-hemispheric contributions (\*\* $p < 0.001$ ; \*\* $p < 0.01$ ; \* $p < 0.05$ ).

connections from frontal to parietal and from parietal to temporal areas. Statistical test results shown in Fig. 6B suggest that the detected intra-hemispheric connections are significantly higher than inter-hemispheric ones under tone processing. In addition, the change from a dominantly bottom-up temporal to frontal network under resting state to a dominantly top-down frontal to temporal network under tone processing occurs at both inter- and intra-hemispheric levels.

*NLGC for the Beta Band (13 – 25 Hz).* Fig. 7 shows the results of Beta band NLGC analysis in a similar layout as Fig. 5. Fig. 7A shows the detected GC links between frontal and parietal areas for the tone processing vs. resting state conditions and separately for the younger and older subjects. The group average of the detected links across younger and older participants are shown on the left and those of two representative individuals (one younger and one older) are shown on the right. Note that the links involving temporal areas are not shown for the sake of visual convenience. As it can be seen from both the group average and individual-level plots, there is a striking dominance of frontal to parietal links (blue arrows) for older subject under tone listening (first and third columns, bottom plots), whereas in all the other three cases, parietal to frontal links (green arrows) dominate.

Fig. 7B shows the average normalized  $J$ -statistics of the detected GC links between the frontal, temporal and parietal ROIs as color-weighted edges in a directed graph. The edges between parietal and frontal areas, enclosed in dashed ovals, correspond to the normalized average of the weighted arrows shown in the first two columns of Fig. 7A. The GC network under the resting state condition is similar for both age groups,



## Beta Band (13-25 Hz) Connectivity

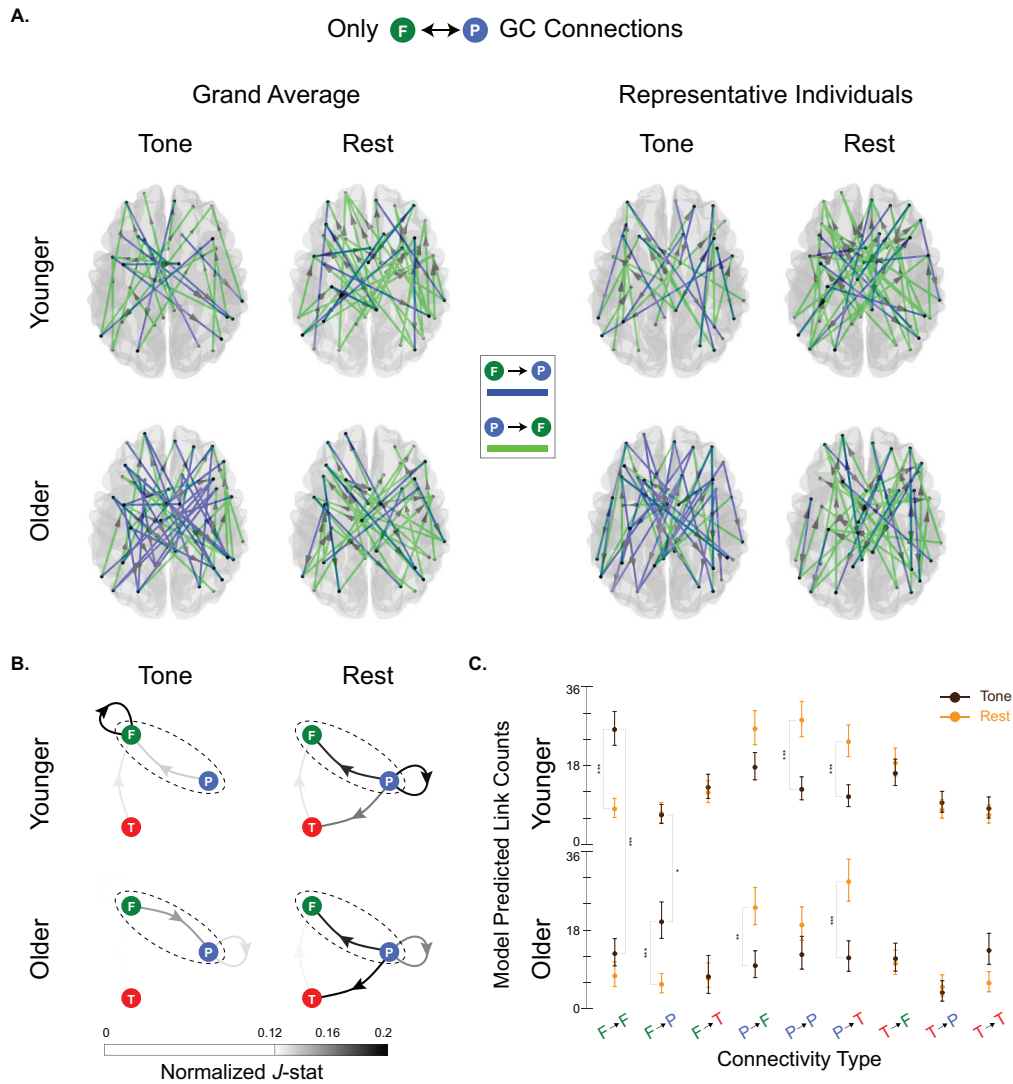

**Figure 7:** NLGC analysis of experimentally recorded MEG data in the Beta band (13 – 25 Hz). **A.** Extracted GC links between frontal and parietal areas overlaid on dorsal brain plots for younger (top row) and older (bottom row) participants. The first two columns correspond to the group averages and the last two correspond to two representative participants, for the two task conditions of tone processing (first and third columns) and resting state (second and fourth columns). For the group average plots, only *J*-statistic values greater than 0.75 are shown for visual convenience. There is a notable increase of frontal to parietal links under tone processing for older adults (blue arrows, first and third columns, bottom row), whereas in all the other cases parietal to frontal links (green arrows) are dominant. **B.** Normalized *J*-statistics, averaged over subjects within each age group, between frontal, temporal, and parietal areas for tone processing vs. resting state conditions and younger vs. older participants. The dashed ovals indicate the normalized average number of links shown in panel A. There are notable changes across both task conditions and age groups, including the higher involvement of parietal areas during resting state, increase of frontal to frontal connections for younger participants and top-down links from frontal to parietal areas for older participants, during tone processing. **C.** Statistical testing results showing several significant differences across task conditions and age groups (\*\* $p < 0.001$ ; \* $p < 0.01$ ;  $p < 0.05$ ).

378 but during tone processing, the network structures are quite different. First, for younger subjects, frontal to  
379 frontal connections have a higher contribution to the network as compared to older subjects. On the other  
380 hand, as pointed out earlier, for older participants during tone processing, the number of incoming links  
381 to parietal from frontal areas increase, as compared to the younger group. Finally, for both younger and  
382 older subjects, there are more parietal to temporal connections in resting state compared to tone processing.  
383 Fig. 7C summarizes the statistical test results which indeed show both across-age and across-condition  
384 differences, for the two connectivity types of frontal to frontal and frontal to parietal, as well as several  
385 connectivity changes across the task conditions within the two age groups.

### 386 **3. Discussion and Concluding Remarks**

387 Extracting causal influences across cortical areas in the brain from neuroimaging data is key to revealing  
388 the flow of information during cognitive and sensory processing. While techniques such as EEG and MEG  
389 offer temporal resolution in the order of milliseconds and are thus well-suited to capture these processes  
390 at high temporal resolution, they only provide low-dimensional and noisy mixtures of neural activity. The  
391 common approach for assessing cortical connectivity proceeds in two stages: first the neuromagnetic inverse  
392 problem is solved to estimate the source activity, followed by performing connectivity analysis using these  
393 source estimates. While convenient to use, this methodology suffers from the destructive propagation of the  
394 biases that are introduced in favor of source localization in the first stage to the second stage of network  
395 inference, often resulting in significant spurious detection.

396 In this work, we propose a unified framework, NLGC inference, to directly capture Granger causal links  
397 between cortical sources from MEG measurements, without the need for an intermediate source localization  
398 stage and with high statistical precision. We evaluated the performance of NLGC through comprehensive  
399 simulation studies, which revealed the performance gains of NLGC compared to the conventional two-stage  
400 procedures in terms of achieving high hit rate, remarkably low false alarm rate, and robustness to model  
401 mismatch and low SNR conditions.

402 We applied NLGC to experimentally recorded MEG data from an auditory experiment comparing tri-  
403 als of tone processing and resting conditions, from both younger and older participants. We analyzed the  
404 data in two frequency bands whose coherence has been shown to differ when processing auditory stimuli  
405 compared to rest (Weiss and Rappelsberger, 2000), namely the combined Delta+Theta band and the Beta  
406 band. The extracted cortical networks using NLGC revealed several striking differences across the fre-  
407 quency bands, age groups, and task conditions. In particular, in the Delta+Theta band, the networks were  
408 dominantly top-down from frontal to temporal and parietal areas during tone processing. Previous studies  
409 have observed increased coherence between frontal and central and temporal electrodes during auditory  
410 processing versus rest, potentially indicative of greater demands on memory and inhibitory processes that  
411 are required for active listening (Weiss and Rappelsberger, 2000). Greater anterior to posterior interactivity

412 has particularly been observed in the Theta band in support of working memory (Sarnthein et al., 1998) and  
413 other top-down processes (Sauseng et al., 2008), in line with the functioning of the frontal-parietal attention  
414 network (Sauseng et al., 2005). However, during resting state, bottom-up links towards frontal areas sig-  
415 nificantly increased. This broadly aligns with a previous Granger causality analysis that found evidence of  
416 unidirectional parietal to frontal connections during resting state fMRI (Duggento et al., 2018). In addition,  
417 intra-hemispheric links were more dominant during tone processing as compared to inter-hemispheric links,  
418 whereas the inter- and intra-hemispheric contributions were nearly balanced during resting state. This may  
419 align with evidence that even low level auditory stimuli are processed in a lateralized fashion (Millen et al.,  
420 1995; Brown and Nicholls, 1997). Additionally, in an fMRI study of 100 adults, Granger causality analyses  
421 revealed that parietal-to-frontal connectivity was localized to within-hemispheric pathways (Duggento et al.,  
422 2018). Cross-hemispheric connectivity was largely observed within lobes (e.g., frontal-to-frontal). Although  
423 there are a number of methodological differences between these studies, together they suggest that NLGC  
424 can reveal robust differences in the directionality and band specificity of patterns of connectivity during task  
425 processing and at rest.

426 In general, greater and/or more extensive frontotemporalparietal functional connectivity has been ob-  
427 served when processing clearer auditory stimuli (Abrams et al., 2013; Yue et al., 2013) and for younger  
428 compared to older adults (Andrews-Hanna et al., 2007; Peelle et al., 2010). The current results broadly  
429 align with these results, but further indicate the directionality and frequency band that may drive those  
430 observed differences in connectivity. While our analysis of the Delta+Theta band did not suggest any age  
431 differences across age groups, the networks seen in the Beta band revealed key age-related differences during  
432 the tone processing task. For younger participants, most of the connections were from parietal and tempo-  
433 ral to frontal areas, including frontal to frontal connectivity. However, in older participants, parietal areas  
434 were significantly more engaged in the network with notable connections towards frontal areas. Long-range  
435 synchrony between frontal and parietal cortices in the Beta band has been observed to dominate during  
436 top-down attentional processing (Buschman and Miller, 2007) and is thought to support the enhancement  
437 of task-relevant information (Antzoulatos and Miller, 2016). There is also some evidence that Beta band  
438 connectivity increases with aging (Moezzi et al., 2019; Vysata et al., 2014). The results did not yield support  
439 for previous observations of inter-hemispheric asymmetry reduction with age (Dolcos et al., 2002) in terms of  
440 increasing inter-hemispheric connectivity (Maurits et al., 2006). However, this is likely due to the simplicity  
441 of the tone counting and rest conditions examined in the present study. Future analyses of speech materials  
442 with greater task demands may be more sensitive to such differences.

443 The NLGC framework includes several technical contributions that are unified within the same method-  
444 ology, but may also be of independent interest in neural signal processing. These include: 1) a scalable  
445 sparse VAR model fitting algorithm based on indirect and low-dimensional observations, that leverages  
446 steady-state approximations to linear Gaussian state-space inference, sparse model selection, and low-rank

447 approximations to the lead field matrix; and 2) establishing the asymptotic distributions of the de-biased  
448 deviance difference statistics from MEG observations, that may be used in more general hypothesis testing  
449 frameworks.

450 Along with its several improvements over existing work, NLGC comes with its own limitations. First,  
451 NLGC requires sufficiently long trial duration, so that the underlying network parameters can be estimated  
452 reliably. While the sparsity regularization in NLGC mitigates this issue to some extent, in general the  
453 number of parameters needed to be estimated from  $NT$  observed MEG sensor data points is in the order  
454 of  $\sim KM^2$ . As an example, to ensure that the number of parameters is in the order of the number of data  
455 points for the sake of estimation accuracy, for the typical configurations in this work (i.e.,  $N = 155$  sensors,  
456  $M = 84$  sources, 5-fold cross-validation, 10 Hz frequency band, 100 ms integration window), trials of at  
457 least  $T = 25$  s in duration are needed. While this requirement was satisfied by the experimental trials used  
458 in our work, as also validated in Section 4.8.3, NLGC may not perform well in experiments involving short  
459 trials, such as those studying sensory evoked field potentials in which a large number of trials, each in the  
460 order of 1 s in duration, are available (David et al., 2006a,b).

461 Second, while NLGC maintains a remarkably low false alarm rate in a wide range of settings, it is  
462 more sensitive to model mismatch in terms of its hit rate performance, as compared with existing two-stage  
463 approaches, as examined in Fig. 4B. This is due to the fact that while integrating source localization and VAR  
464 parameter estimation in NLGC is advantageous to rejecting spurious GC links, eliminating the first stage  
465 of source localization makes NLGC more sensitive to the accuracy of the source space used in estimating  
466 the source time-courses and thereby correctly detecting the true GC links. The hit rate performance of  
467 NLGC could be improved by using a more refined source space, but this in turn might require a longer  
468 observation duration for accurate parameter estimation. Finally, our experimental data validation here was  
469 limited by the lack of access to ground truth source activity. We defer validating the performance of NLGC  
470 using invasive recordings such as electrocorticography or intracranial EEG, in which the sources are directly  
471 observable, to future work.

472 In addition to the aforementioned technical contributions, NLGC also offers several practical advantages  
473 over existing work. First, due to its scalable design, it can be applied to any frequency band of interest  
474 to extract the underlying GC networks. Secondly, due to the precise statistical characterization of the  
475 detected links, the networks can be transformed to span ROIs of arbitrary spatial resolution, from cortical  
476 dipoles to anatomical ROIs, cortical lobes, and hemispheres. Third, unlike most existing connectivity  
477 analysis methods that require heavy trial averaging to mitigate spurious detection, NLGC exhibits robustness  
478 to model mismatch and low SNR conditions, even where few trials are available. Finally, thanks to the  
479 plug-and-play nature of the NLGC building blocks, it can be modified for inferring other network-level  
480 characterizations, such as cortical transfer entropy (Daube et al., 2022). To ease reproducibility, we have  
481 made a python implementation of NLGC publicly available on Github (Soleimani and Das, 2022). In

482 summary, NLGC can be used as a robust and scalable alternative to existing approaches for GC inference  
483 from neuroimaging data.

#### 484 4. Theory and Methods

485 Here we lay out in detail the generative framework that entails the computational model for relating the  
486 neural activity, which produces magnetic fields outside of the brain, to the recordings at the highly sensitive  
487 MEG sensors. This generative framework deals with the unobserved neural activity as latent entities: the  
488 notion of Granger causality is defined with respect to the latent neural activity. We then propose a novel  
489 approach to identify the parameters of the generative model from the multi-channel MEG recordings and  
490 construct Granger causal measures to quantify the detected links. We call this unified framework the  
491 Network Localized Granger Causality (NLGC) framework.

##### 492 4.1. Main Problem Formulation

493 Recall the observation and state evolution models given in Eqs. (1) and (2):

$$494 \quad \mathbf{y}_t = \mathbf{C}\mathbf{x}_t + \mathbf{n}_t, \quad \mathbf{x}_t = \sum_{k=1}^K \mathbf{A}_k \mathbf{x}_{t-k} + \mathbf{w}_t, \quad t = 1, \dots, T,$$

495 where  $T$  is the observation duration,  $\mathbf{x}_t \in \mathbb{R}^M$  and  $\mathbf{y}_t \in \mathbb{R}^N$  are, respectively, the cortical activity of  $M$   
496 distributed sources and the measurements of  $N$  sensors at time  $t$ . The process noise  $\mathbf{w}_t$  and observation  
497 noise  $\mathbf{v}_t$  are assumed to be independent of each other and are modeled as i.i.d. sequences of zero mean  
498 Gaussian random vectors with respective covariance matrices  $\mathbf{Q} = \text{diag}(\sigma_1^2, \dots, \sigma_M^2)$  and  $\mathbf{R}$ .

499 The lead-field matrix  $\mathbf{C} \in \mathbb{R}^{N \times M}$  can be estimated using a quasi-static solution to the Maxwell's equa-  
500 tions using a realistic head model obtained by MR scans (Sarvas, 1987; Mosher et al., 1999; Baillet et al.,  
501 2001). The measurement noise covariance matrix  $\mathbf{R}$  is assumed to be known, as it can be estimated based  
502 on empty room recordings (Engemann and Gramfort, 2015). Thus the unknown parameters in these models  
503 are: the  $M \times M$  coefficient matrices  $\mathbf{A}_k$ , that quantify the contribution of the neural activity from time  
504  $t - k$  to the current activity at time  $t$ , for  $k = 1, \dots, K$ , and the process noise covariance matrix  $\mathbf{Q}$ .

505 Assuming that the source time-series  $\mathbf{x}_t$  form an underlying network, our main contribution is to find the  
506 inverse solution to this latent network, in the sense of Granger causality, directly from the MEG observations  
507  $\mathbf{y}_t$ . We first give an overview of Granger causality while highlighting the challenges in GC inference from  
508 MEG data.

##### 509 4.2. Overview of Granger Causality

510 First, we assume that the sources  $\mathbf{x}_t$  are directly observable. Noting that  $[\mathbf{A}_k]_{i,j}$  quantifies the contri-  
511 bution of source  $j$  at time  $t - k$  to the present activity of source  $i$  at time  $t$ , one can statistically assess the  
512 causal effect of source  $j$  on source  $i$  via the following hypothesis test:

513 •  $H_0$ :  $[\mathbf{A}_k]_{i,j} = 0$  for all  $k = 1, 2, \dots, K$ , i.e., there is no causal influence from source  $j$  to source  $i$ .

514 •  $H_1$ :  $[\mathbf{A}_k]_{i,j} \neq 0$  for any  $k = 1, 2, \dots, K$ , i.e., there exists a causal influence from source  $j$  to source  $i$ .

515 Given that the VAR coefficients  $\{\mathbf{A}_k\}_{k=1}^K$  are unknown, to test this hypothesis, reliable estimates  $[\hat{\mathbf{A}}_k]_{i,j}$ ,  
 516  $1 \leq i, j \leq M$  and  $1 \leq k \leq K$  are needed. However, such accurate estimates are often elusive due to limited  
 517 observation horizon  $T$  compared to the number of parameters. Granger causality (Granger, 1969; Geweke,  
 518 1984, 1982) addresses this issue by considering the “bulk” effect of the VAR model coefficients through the  
 519 prediction error metric. To this end, in assessing the causal influence of source  $j$  on source  $i$  two competing  
 520 models are considered:

521 • *Full model*, where the activity of source  $i$  is modeled via the past activity of all the sources:

$$522 \quad x_{i,t} = \sum_{m=1}^M \sum_{k=1}^K [\mathbf{A}_k^f]_{i,m} x_{m,t-k} + w_{i,t}^f, \quad w_{i,t}^f \sim \mathcal{N}(0, \sigma_i^2), \quad t = 1, \dots, T. \quad (3)$$

523 • *Reduced model*, where the contribution of the past of source  $j$  is removed from the full model by  
 524 enforcing  $[\mathbf{A}_k]_{i,j} = 0, \forall k = 1, 2, \dots, K$ :

$$525 \quad x_{i,t} = \sum_{\substack{m=1, \\ m \neq j}}^M \sum_{k=1}^K [\mathbf{A}_k^r]_{i,m} x_{m,t-k} + w_{i,t}^r, \quad w_{i,t}^r \sim \mathcal{N}(0, \sigma_{i \setminus j}^2), \quad t = 1, \dots, T. \quad (4)$$

526 Note that we here use the *conditional* notion of Granger causality (Geweke, 1984), which includes all the  
 527 processes  $x_{m,\cdot}, m \neq j$  in both the reduced and full models. The process noise variables  $w_{i,t}^f$  and  $w_{i,t}^r$  have  
 528 different variances given by  $\sigma_i^2$  and  $\sigma_{i \setminus j}^2$ , respectively. Define

$$529 \quad \mathcal{F}_{(j \rightarrow i)} := \log \frac{\sigma_{i \setminus j}^2}{\sigma_i^2}. \quad (5)$$

530 Clearly, when  $j$  has no causal influence on  $i$ ,  $\mathcal{F}_{(j \rightarrow i)} = 0$ , otherwise  $\mathcal{F}_{(j \rightarrow i)} > 0$ , since the reduced model  
 531 is nested in the full model, i.e.,  $\sigma_{i \setminus j}^2 \geq \sigma_i^2$ . In practice, the VAR model coefficients  $\mathbf{A}_k^f$  and  $\mathbf{A}_k^r$ , as well  
 532 as the prediction variances  $\sigma_i^2$  and  $\sigma_{i \setminus j}^2$  need to be estimated from the data. Let  $\hat{\sigma}_i^2$  and  $\hat{\sigma}_{i \setminus j}^2$  be the  
 533 respective estimates of the prediction variances of the full and reduced models. Then, the resulting estimate  
 534  $\hat{\mathcal{F}}_{(j \rightarrow i)} := \log \frac{\hat{\sigma}_{i \setminus j}^2}{\hat{\sigma}_i^2}$  is a data-dependent random variable. Using  $\hat{\mathcal{F}}_{(j \rightarrow i)}$ , the previous hypotheses  $H_0$  and  $H_1$   
 535 for causality can be replaced by those of Granger causality (Greene, 2003):

536 •  $H'_0$ :  $\hat{\mathcal{F}}_{(j \rightarrow i)} \approx 0$ , or equivalently  $\hat{\sigma}_i^2 \approx \hat{\sigma}_{i \setminus j}^2$ . This implies that including the activity history of source  
 537  $j$  does not significantly improve the prediction error of source  $i$ , i.e., there is no Granger causal link  
 538 from  $j$  to  $i$ .

539 •  $H'_1$ :  $\hat{\mathcal{F}}_{(j \rightarrow i)} \gg 0$ , or equivalently  $\hat{\sigma}_i^2 \ll \hat{\sigma}_{i \setminus j}^2$ . This implies that including the activity history of source



540  $j$  significantly improves the prediction accuracy of source  $i$ , i.e., there is a Granger causal link from  $j$   
541 to  $i$ .

542 The test statistic  $\widehat{\mathcal{F}}_{(j \rightarrow i)}$  is referred to as the GC metric. In order to perform the latter hypothesis test,  
543 the asymptotic distribution of  $\widehat{\mathcal{F}}_{(j \rightarrow i)}$  is utilized to obtain p-values (Kim et al., 2011). More specifically,  
544 under mild conditions,  $T \times \widehat{\mathcal{F}}_{(j \rightarrow i)}$  converges in distribution to a chi-square random variable with  $K$  degrees  
545 of freedom, i.e.,  $\chi^2(K)$  (Wald, 1943; Davidson and Lever, 1970).

#### 546 4.3. Challenges of GC Analysis for MEG

547 When it comes to GC analysis of cortical sources using MEG, there are several outstanding challenges:

548 1) *Indirect and Low-dimensional Sensor Measurements.* The foregoing notion of Granger causality assumes  
549 that the source time-series  $\{x_{i,t}\}_{t=1}^T, i = 1, 2, \dots, M$  are directly observable. However, MEG only provides  
550 indirect and low-dimensional sensor measurements  $\mathbf{y}_t \in \mathbb{R}^N$ , where typically  $N \ll M$ . As such, GC analysis  
551 of MEG data inherits the ill-posedness of estimating high-dimensional sources from low-dimensional sensor  
552 measurements (Wipf et al., 2010; Tait et al., 2021).

553 2) *Limited Observation Duration.* In order to obtain accurate estimates of the VAR model parameters and  
554 consequently prediction variances of the full and reduced models, typically observations with long duration  
555  $T$  are required. However, the observation length is limited by the typically short duration of cognitive or  
556 sensory experimental trials. Even if trials with long duration were available, for the stationary model of Eq.  
557 (2) to be valid (i.e., static VAR parameters),  $T$  may not be chosen too long.

558 3) *Precise Statistical Characterization of the GC Links.* While the asymptotic distribution of the null hy-  
559 pothesis in the classical GC setting allows to obtain p-values, it is not clear how this asymptotic distribution  
560 behaves under the indirect and low-dimensional observations given by MEG. Furthermore, p-values only  
561 control Type I error, and in order to precisely characterize the statistical strength of the detected GC links,  
562 Type II errors need to also be quantified.

563 Existing methods aim at addressing the aforementioned challenges separately. In order to address chal-  
564 lenge 1, source localization is used in a two-stage approach, where the cortical sources are first estimated  
565 using a source localization method, then followed by GC analysis (Cai et al., 2021, 2018; Owen et al., 2012);  
566 in order to address challenge 2, regularized least squares estimation is used to reduce the variance of the  
567 estimated VAR parameters (Endemann et al., 2022; Bolstad et al., 2011); and challenge 3 is usually ad-  
568 dressed using non-parametric statistical testing, which may have limited power due to the large number  
569 of statistical comparisons involved (Cheung et al., 2010; Sekihara et al., 2010; Manomaisaowapak et al.,  
570 2021). It is noteworthy that these challenges are highly inter-dependent. For instance, the biases incurred  
571 by the source localization stage in favor of addressing challenge 1, may introduce undesired errors in the



572 VAR parameter estimation to address challenge 2 (Schoffelen and Gross, 2009). Similarly, using regularized  
 573 estimators to address challenge 2 introduces biased in the test statistics used in addressing challenge 3.

#### 574 4.4. Proposed Solution: Network Localized Granger Causal (NLGC) Inference

575 We propose to address the foregoing challenges simultaneously and within a unified inference framework.  
 576 To this end, we first cast Granger causal inference as an inverse problem using the generative models of  
 577 Eqs. (2) and (1). To address the parameter estimation challenge of this inverse problem, we leverage sparse  
 578 connectivity in cortical networks and utilize  $\ell_1$ -regularized estimation of the VAR parameters. Finally, to  
 579 characterize the statistical strengths of the identified GC links, we establish the asymptotic properties of  
 580 a test statistic, namely the de-biased deviance difference, which will allow us to parametrically quantify  
 581 both Type I and Type II errors rates and also control the false discovery rate. We refer to our proposed  
 582 method as the Network Localized Granger Causality (NLGC) analysis. The main building blocks of NLGC  
 583 are introduced in the remaining part of this subsection.

##### 584 4.4.1. Efficient Parameter Estimation and Likelihood Computation

585 It is straightforward to show that this classical GC metric, i.e., log-ratio of the prediction variances of  
 586 the reduced and full models in Eq. (5) is equivalent to the difference of the log-likelihoods of the full and  
 587 reduced models, for linear Gaussian generative models. This correspondence has led to the generalization  
 588 of the GC metric to non-linear and non-Gaussian settings (Kim et al., 2011; Sheikhattar et al., 2018).

589 We take a similar approach to generalize the classical notion of GC for direct observations of the sources  
 590 to our indirect observations given by the MEG sensors. Recall that for assessing the GC from source  $j$  to  
 591  $i$ , we considered the full and reduced models given by Eqs. (3) and (4). Let  $\mathbf{A}^f := (\mathbf{A}_1^f, \mathbf{A}_2^f, \dots, \mathbf{A}_K^f)$  and  
 592  $\mathbf{A}^r := (\mathbf{A}_1^r, \mathbf{A}_2^r, \dots, \mathbf{A}_K^r)$  be the VAR parameters matrices, and  $\mathbf{Q}^f := \text{diag}(\sigma_1^{f2}, \sigma_2^{f2}, \dots, \sigma_M^{f2})$  and  $\mathbf{Q}^r :=$   
 593  $\text{diag}(\sigma_1^{r2}, \sigma_2^{r2}, \dots, \sigma_M^{r2})$  be the process noise covariance matrices of the full and reduced models, respectively.  
 594 The main difference between these sets of parameters is that  $[\mathbf{A}_k^r]_{i,j} = 0, \forall k = 1, 2, \dots, K$ . Let the log-  
 595 likelihoods of the MEG observations under the full and reduced models be defined as:

$$596 \begin{cases} \ell^i(\mathbf{A}^f, \mathbf{Q}^f | \mathbf{y}_{1:T}) := \log p(\mathbf{y}_{1:T}; \mathbf{A}^f, \mathbf{Q}^f), & \text{full model log-likelihood} \\ \ell^{i \setminus j}(\mathbf{A}^r, \mathbf{Q}^r | \mathbf{y}_{1:T}) := \log p(\mathbf{y}_{1:T}; \mathbf{A}^r, \mathbf{Q}^r), & \text{reduced model log-likelihood} \end{cases} \quad (6)$$

597 Let  $\widehat{\mathbf{A}}^f, \widehat{\mathbf{A}}^r, \widehat{\mathbf{Q}}^f$ , and  $\widehat{\mathbf{Q}}^r$  be the regularized maximum likelihood estimates of the corresponding parameters.  
 598 We then define the GC metric from source  $j$  to  $i$  given the MEG observations as (Kim et al., 2011; Sheikhattar  
 599 et al., 2018; Soleimani et al., 2020):

$$600 \widetilde{\mathcal{F}}_{(j \rightarrow i)} := \ell^i(\widehat{\mathbf{A}}^f, \widehat{\mathbf{Q}}^f | \mathbf{y}_{1:T}) - \ell^{i \setminus j}(\widehat{\mathbf{A}}^r, \widehat{\mathbf{Q}}^r | \mathbf{y}_{1:T}). \quad (7)$$

601 As for the regularization scheme, we consider  $\ell_1$ -norm regularized maximum likelihood estimation. Let  
 602  $\mathbf{a}_i$  be the  $i^{\text{th}}$  row of  $\mathbf{A}$ , correspond to all the network interactions towards source  $i$ . The parameters are  
 603 estimated as:

$$604 \begin{cases} \{\hat{\mathbf{A}}^f, \hat{\mathbf{Q}}^f\} = \operatorname{argmax}_{\mathbf{A}, \mathbf{Q}} \ell^i(\mathbf{A}, \mathbf{Q} | \mathbf{y}_{1:T}) - \lambda \sum_{m=1}^M \|\mathbf{a}_m\|_1, \\ \{\hat{\mathbf{A}}^r, \hat{\mathbf{Q}}^r\} = \operatorname{argmax}_{\mathbf{A}', \mathbf{Q}'} \ell^{i \setminus j}(\mathbf{A}', \mathbf{Q}' | \mathbf{y}_{1:T}) - \lambda' \sum_{m=1}^M \|\mathbf{a}'_m\|_1, \end{cases} \quad (8)$$

605 where  $\lambda, \lambda'$  are regularization parameters that are tuned in a data-driven fashion using cross-validation (See  
 606 Appendix A.1 for details). Since the source activity  $\{\mathbf{x}_t\}_{t=1}^T$  is not directly observable, we employ an  
 607 instance of Expectation-Maximization (EM) algorithm (Shumway and Stoffer, 1982; Dempster et al., 1977)  
 608 to solve the regularized maximum likelihood problem. The EM algorithm is an iterative procedure which  
 609 maximizes a lower bound on the log-likelihood function and provides a sequence of improving solutions.  
 610 The EM algorithm has two steps: 1) The Expectation step (E-step) where we calculate the expectation  
 611 of the log-likelihood of both the observed and unobserved variables given the observations and a current  
 612 estimate of the parameters to construct a lower bound on the actual observation log-likelihood, and 2) The  
 613 Maximization step (M-step) where we maximize the surrogate function obtained in the E-step to update  
 614 the estimate of the unknown parameters.

615 More specifically, we illustrate these two steps for estimating the parameters of the full model; the case of  
 616 reduced model is treated in a similar fashion. Let the unknown parameters be denoted by  $\boldsymbol{\theta} := (\boldsymbol{\theta}_1, \dots, \boldsymbol{\theta}_M)$ ,  
 617 where  $\boldsymbol{\theta}_i := (\sigma_i^{f2}, \mathbf{a}_i^f)$  is the corresponding unknown parameters of the  $i^{\text{th}}$  source with  $\mathbf{a}_i^f := ([\mathbf{A}_k^f]_{i,j}, \forall j, k)$ .  
 618 The EM algorithm in this case comprises the following steps:

619 The E-step: Starting from an initial point, let us denote the parameter estimates at the  $l^{\text{th}}$  iteration of the  
 620 EM algorithm by  $\hat{\boldsymbol{\theta}}^{(l)}$ . At the E-step, we define the so-called Q-function:

$$621 Q(\boldsymbol{\theta} | \hat{\boldsymbol{\theta}}^{(l)}) := \mathbb{E}[\log p(\mathbf{x}_{1:T}, \mathbf{y}_{1:T}; \boldsymbol{\theta}) | \mathbf{y}_{1:T}; \hat{\boldsymbol{\theta}}^{(l)}]. \quad (9)$$

622 Given the linear Gaussian state-space model used as our generative model, the expectation in Eq. (9)  
 623 requires the first and second moments of  $\mathbf{x}_t$  given  $\mathbf{y}_{1:T}$  and  $\hat{\boldsymbol{\theta}}^{(l)}$  and can thus be efficiently computed using  
 624 Fixed Interval Smoothing (FIS) (Anderson and Moore, 2005).

625 The M-step: At the M-step, we update the parameters as

$$626 \hat{\boldsymbol{\theta}}^{(l+1)} := \operatorname{argmax}_{\boldsymbol{\theta}} Q(\boldsymbol{\theta} | \hat{\boldsymbol{\theta}}^{(l)}) + R_p(\boldsymbol{\lambda}, \boldsymbol{\theta}), \quad (10)$$

627 where  $R_p(\boldsymbol{\lambda}, \boldsymbol{\theta})$  is a regularization function to enforce sparsity of the parameters. Here, we use the FASTA  
 628 algorithm to solve the optimization problem in Eq. (10) (Goldstein et al., 2014). These steps continue  
 629 until convergence of the iterates  $\hat{\boldsymbol{\theta}}^{(l)}$ . To assess convergence, the log-likelihood of the MEG observations

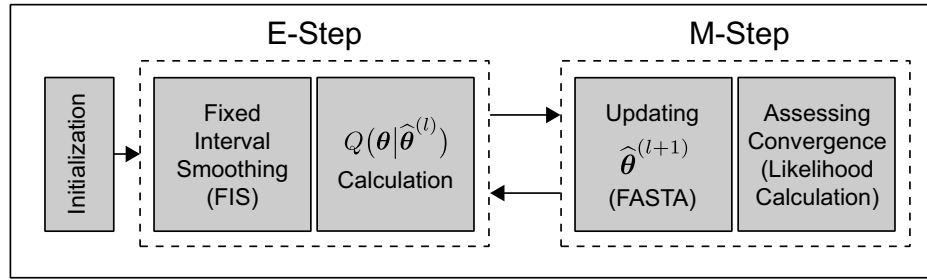

**Figure 8:** Block diagram of the EM algorithm for sparse VAR parameter estimation.

630 is calculated (Gupta and Mehra, 1974) at each iteration, to check whether the successive improvements of  
 631 the log-likelihood fall below a specified threshold. Fig. 8 gives an overview of the EM algorithm, which is  
 632 derived in full details in Appendix A.

633 Employing the foregoing EM procedure, one can reliably estimate the set of parameters  $\theta$  corresponding  
 634 to the full model and reduced models for all possible links ( $j \mapsto i$ ) and evaluate the log-likelihoods to form  
 635 the GC metric  $\tilde{\mathcal{F}}_{(j \mapsto i)}$  of Eq. (7), for all  $i, j = 1, 2, \dots, M, i \neq j$ .

#### 636 4.4.2. Computational Complexity of the Parameter Estimation Procedure

637 Applied to MEG, off-the-shelf solvers do not scale well with the dimensions of the source space  $M$ , sensor  
 638 space  $N$ , and observation length  $T$ . We employ several solutions to address this need for scalability of the  
 639 parameter estimation procedure:

640 (1) First, we use a low-rank approximation to the lead-field matrix that reduces the effective dimensionality  
 641 of the source space. This approach is explained in detail in Section 4.5.1.

642 (2) We use the steady-state solution to the smoothing covariance matrices involved in FIS that notably  
 643 speed up the computations. This approach is explained in detail in Appendix A.2.

644 (3) We use the Fast Adaptive Shrinkage/Thresholding Algorithm (FASTA) algorithm to efficiently solve the  
 645  $\ell_1$ -regularized optimization in the M-step. This approach is explained in Appendix A.1.

646 (4) We efficiently evaluate the various log-likelihood functions, which are key for cross-validation and the  
 647 EM stopping criterion, using the innovation form of the smoothed states (Gupta and Mehra, 1974).

648 In what follows, we discuss the implications of these algorithmic solutions in reducing the computational  
 649 complexity of our EM-based parameter estimation procedure used for solving Eq. (8), in comparison to  
 650 existing work.

651 As it will be shown in Section 4.5.1, Solution (1) results in an effective lead-field matrix with  $rM$  columns,  
 652 where  $M$  is the number of cortical patches used and  $r \geq 1$  is the number eigenmodes retained in the low-  
 653 rank representation of the lead-fields in each patch. Also, Solution (2), using the steady-state Kalman  
 654 filtering/smoothing, reduces the total number of state covariance matrix inversions in the FIS procedure

655 from  $T$  to 2, by only adding  $\mathcal{O}\left(\left((rM)^2K\right)^3\right)$  multiplications required to find the steady-state covariance  
 656 matrices (Malik et al., 2010). Considering the cubic dependence of matrix inversion to the matrix dimension,  
 657 each instance of FIS requires  $\mathcal{O}\left(\left((rM)^2K\right)^3\right) + \mathcal{O}\left(T\left((rM)^2K\right)^2\right)$  multiplications, which can then be used  
 658 to form the elements of the Q-function in the E-step.

659 At the M-step, Solution (3) uses FASTA to update the parameters. As a gradient-based method, for  
 660 an optimality gap of  $\varepsilon > 0$ , it requires  $\mathcal{O}\left(\frac{1}{\varepsilon}\right)$  iterations, and each iteration requires  $\mathcal{O}\left(\left((rM)^2K\right)^2\right)$  multi-  
 661 plications (Beck and Teboulle, 2009; Goldstein et al., 2014). Here, we denote the complexity of FASTA by  
 662  $L_{\text{FASTA}} = \mathcal{O}\left(\frac{1}{\varepsilon}\left((rM)^2K\right)^2\right)$ . Next, Solution (4) provides an efficient method to compute the log-likelihood  
 663 of the MEG observations (Gupta and Mehra, 1974), which only includes matrix additions and matrix  
 664 by vector multiplications based on the quantities already calculated at the FIS procedure, adding up to  
 665  $\mathcal{O}\left(T\left((rM)^2K\right)^2\right)$  multiplications. Finally, letting  $L_{\text{EM}}$  be the number of EM iterations, each application of  
 666 the EM algorithm requires  $\mathcal{O}\left(\left((rM)^2K\right)^3L_{\text{EM}}\right) + \mathcal{O}\left(T\left((rM)^2K\right)^2L_{\text{EM}}\right) + \mathcal{O}\left(L_{\text{FASTA}}L_{\text{EM}}\right)$  multiplications.

667 The problems in Eq. (8) need to be solved for both the full and reduced models. The only difference  
 668 between the full model and reduced model corresponding to the link ( $j \mapsto i$ ) is the fact that in the reduced  
 669 model, one set of the cross-coupling coefficients  $\mathbf{a}_{i,j,k}$  ( $k = 1, \dots, K$ ) are constrained to be zero during the  
 670 EM procedure (See Remark 2 in Appendix A.1). The total number of such estimation problems to be  
 671 solved is  $M(M-1) + 1 = \mathcal{O}(M^2)$ . Thus, the overall computational complexity of our parameter estimation  
 672 procedure is given by  $\mathcal{O}\left(r^6M^8K^3L_{\text{EM}}\right) + \mathcal{O}\left(Tr^4M^6K^2L_{\text{EM}}\right) + \mathcal{O}\left(M^2L_{\text{FASTA}}L_{\text{EM}}\right)$ . In the applications  
 673 of interest in this work, typically the convergence criteria is satisfied with a choice of  $L_{\text{FASTA}} \approx 100$  and  
 674  $L_{\text{EM}} \approx 1000$ , which mitigates the dependence of the overall computational complexity on these parameters.

675 The improvements achieved by Solutions (1) and (2) provide notable computational savings over existing  
 676 work (Nalatore et al., 2009; Cheung et al., 2010; Sekihara et al., 2010; Long et al., 2011; Lamus et al., 2012):  
 677 1) If the low-rank approximation to the lead-field matrix is not used, the term  $r$  is replaced by 61 (see Section  
 678 4.5.1 for details). Given that we use a value of  $r = 4$  in our work, this amounts to a  $\sim 10^7$ -fold reduction  
 679 in the complexity of the leading term that is  $\mathcal{O}\left(r^6M^8K^3L_{\text{EM}}\right)$ ; 2) If the steady-state filtering/smoothing  
 680 is not used, the first term in the computational complexity of the EM procedure would be increased to  
 681  $\mathcal{O}\left(Tr^6M^8K^3L_{\text{EM}}\right)$ . Our approach reduces this term by a factor of  $T$ , which in the applications of interest  
 682 in this paper amounts to a  $\sim 10^3$ -fold reduction in complexity.

#### 683 4.4.3. Statistical Test Strength Characterization

684 The next component of NLGC is the characterization of the statistical significance of the obtained GC  
 685 metrics. Let  $\mathcal{I} := \{(j \mapsto i) | 1 \leq i, j \leq M, i \neq j\}$  be the set of all possible GC links among  $M$  sources.  
 686 Consider the link ( $j \mapsto i$ )  $\in \mathcal{I}$  and let us represent the corresponding parameters of the full and reduced  
 687 models of the link as  $\boldsymbol{\theta}^f$  and  $\boldsymbol{\theta}^r$ , respectively, where for  $\boldsymbol{\theta}^r$  we have  $a_{i,j,k}^r = 0, \forall k$ . It is worth noting  
 688 that the number of parameters to be estimated in the full and reduced models are  $M^f := K(rM)^2$  and

689  $M^r := K(rM)^2 - Kr^2$ , respectively. We define the null hypothesis  $H_{(j \rightarrow i),0} : \boldsymbol{\theta} = \boldsymbol{\theta}^r$  for the case that no  
 690 GC link exists, and the alternative  $H_{(j \rightarrow i),1} : \boldsymbol{\theta} = \boldsymbol{\theta}^f$  for the existence of a GC link from source  $j$  to source  
 691  $i$ . A conventional statistic for testing the alternative against the null hypothesis is the *deviance difference*  
 692 between the estimated full and reduced models defined as

$$693 \quad \mathcal{D}_{(j \rightarrow i)} := 2(\ell(\widehat{\boldsymbol{\theta}}^f) - \ell(\widehat{\boldsymbol{\theta}}^r)) = 2\widetilde{\mathcal{F}}_{(j \rightarrow i)}, \quad (11)$$

694 where  $\ell(\boldsymbol{\theta}) := \log p(\mathbf{y}_{1:T}; \boldsymbol{\theta})$  is the log-likelihood of the observations. Large values of  $\mathcal{D}_{(j \rightarrow i)} \gg 0$  indicate  
 695 a large improvement in the log-likelihood of the full model compared to that of the reduced model, which  
 696 implies the existence of a GC link. Similarly,  $\mathcal{D}_{(j \rightarrow i)} \approx 0$  can be interpreted as the absence of a GC link  
 697 from source  $j$  to source  $i$  (Kim et al., 2011).

698 Conventionally, the asymptotic distribution of the deviance difference is derived as a chi-square distri-  
 699 bution, thanks to the asymptotic normality of maximum likelihood estimators (Wald, 1943; Davidson and  
 700 Lever, 1970). However, due to the biases incurred by  $\ell_1$ -norm regularization, the estimates are no longer  
 701 asymptotically normal. To remove the bias and obtain a statistic with well-defined asymptotic behavior, we  
 702 use the de-biased version of the deviance difference introduced in (Sheikhattar et al., 2018; Soleimani et al.,  
 703 2020):

$$704 \quad \mathcal{D}_{(j \rightarrow i)}^{db} := \mathcal{D}_{(j \rightarrow i)} - \mathcal{B}(\widehat{\boldsymbol{\theta}}^r) + \mathcal{B}(\widehat{\boldsymbol{\theta}}^f), \quad (12)$$

705 where  $\mathcal{B}(\boldsymbol{\theta}) := -\dot{\ell}(\boldsymbol{\theta})^\top \ddot{\ell}(\boldsymbol{\theta})^{-1} \dot{\ell}(\boldsymbol{\theta})$  is the empirical bias incurred by  $\ell_1$ -norm regularization (van de Geer et al.,  
 706 2014), with  $\dot{\ell}(\cdot)$  and  $\ddot{\ell}(\cdot)$  denoting the gradient vector and Hessian matrix of the log-likelihood function  $\ell(\cdot)$ ,  
 707 respectively. Removal of the bias allows to recover the well-known asymptotic behavior of the deviance  
 708 difference. We characterize these distributions using the following theorem:

709 **Theorem 1.** *The de-biased deviance difference defined in Eq. (12) converge weakly to the following distri-*  
 710 *butions, under the null and alternative hypotheses (as  $T \rightarrow \infty$ ):*

$$711 \quad [\mathcal{D}_{(j \rightarrow i)}^{db} | H_{(j \rightarrow i),0}] \xrightarrow{d} \chi^2(M^d), \quad (13)$$

$$712 \quad [\mathcal{D}_{(j \rightarrow i)}^{db} | H_{(j \rightarrow i),1}] \xrightarrow{d} \chi^2(M^d, \nu_{(j \rightarrow i)}), \quad (14)$$

713 where  $\chi^2(q)$  denotes the central chi-square distribution with  $q$  degrees of freedom, and  $\chi^2(q, \nu)$  represents the  
 714 non-central chi-square distribution with  $q$  degrees of freedom and non-centrality parameter  $\nu$ , with  $M^d :=$   
 715  $M^f - M^r = Kr^2$ .

716 *Proof.* See Appendix B. ■

717 In words, Theorem 1 states that the asymptotic distribution of the de-biased deviance difference in the  
 718 absence and presence of a GC link is distributed according to central and non-central  $\chi^2$  distributions, both  
 719 with degree of freedom  $Kr^2$ , i.e., the number of VAR parameters from patch  $j$  to  $i$ , respectively. The non-

720 centrality parameter in Eq. (14) can be estimated as  $\hat{\nu}_{(j \mapsto i)} = \max \left\{ \sum_{l=1}^L \mathcal{D}_{(j \mapsto i)}^{db, (l)} / L - M^d, 0 \right\}$  where  $\mathcal{D}_{(j \mapsto i)}^{db, (l)}$   
 721 is the  $l^{\text{th}}$  sample of the de-biased deviance computed from  $L \geq 1$  independent trials (Saxena and Alam,  
 722 1982). We will next show how the result of Theorem 1 can be used for FDR control as well as characterizing  
 723 the test strength.

724 *FDR control.* Recall that rejection of the null hypothesis for a given source and target pair implies the  
 725 existence of a GC link. As a consequence, determining GC links among the source and target pairs requires  
 726 performing  $M(M-1)$  multiple comparisons, which may result in high false discovery. To address this issue,  
 727 we employ the Benjamini-Yekutieli (BY) FDR control procedure (Benjamini and Yekutieli, 2001). Consider  
 728 the link  $(j \mapsto i) \in \mathcal{I}$ . According to the first part of Theorem 1, if the null hypothesis is true, i.e., the GC link  
 729 does not exist, the corresponding de-biased deviance difference is central chi-square distributed. Thus, at a  
 730 confidence level  $1 - \alpha$ , the null hypothesis  $H_{(j \mapsto i), 0}$  is rejected if  $\mathcal{D}_{(j \mapsto i)}^{db} > F_{\chi^2(M^d)}^{-1}(1 - \alpha)$  where  $F_{\chi^2(M^d)}^{-1}(\cdot)$   
 731 is the inverse cumulative distribution function (CDF) of the central  $\chi^2$  distribution with  $M^d$  degrees of  
 732 freedom. Using the BY procedure, the average FDR can be controlled at a rate of  $\bar{\alpha} := \frac{(|\mathcal{I}|+1)\alpha}{2|\mathcal{I}|\log|\mathcal{I}|}$  where  
 733  $|\mathcal{I}| = M(M-1)$  represents the cardinality of the set  $\mathcal{I}$ .

---

**Algorithm 1** FDR control and test strength characterization

---

Input: Degree of freedom  $M^d$ , confidence interval  $1 - \alpha$ , de-biased deviance and non-centrality parameter of all possible  
 links  $\left\{ \mathcal{D}_{(j \mapsto i)}^{db}, \hat{\nu}_{(j \mapsto i)} \mid (j \mapsto i) \in \mathcal{I} \right\}$ .

1: Define  $p$ -values

$$p_{(j \mapsto i)} := 1 - F_{\chi^2(M^d)}(\mathcal{D}_{(j \mapsto i)}^{db}), \quad \forall (j \mapsto i) \in \mathcal{I}.$$

2: Sort  $p$ -values as  $p_{n_1} \geq p_{n_2} \geq \dots \geq p_{n_{|\mathcal{I}|}}$  where  $\{n_1, n_2, \dots, n_{|\mathcal{I}|}\} = \mathcal{I}$ .

3: Find largest  $i_{\max}$  such that  $p_{n_i} \leq \frac{i\alpha}{|\mathcal{I}|\log|\mathcal{I}|}$ .

4: Set  $\bar{\alpha} = \frac{(|\mathcal{I}|+1)\alpha}{2|\mathcal{I}|\log|\mathcal{I}|}$  (FDR).

5: Reject null hypothesis  $H_{n_i, 0}$  for  $i = 1, 2, \dots, i_{\max}$  and calculate  $J$ -values:

$$J_{n_i} = \begin{cases} 1 - \bar{\alpha} - F_{\chi^2(M^d, \hat{\nu}_{(n_i)})}^{-1}(F_{\chi^2(M^d)}^{-1}(1 - \bar{\alpha})), & i = 1, 2, \dots, i_{\max}, \\ 0, & \text{otherwise.} \end{cases}$$

Output:  $J$ -values  $\left\{ J_{(j \mapsto i)} \mid (j \mapsto i) \in \mathcal{I} \right\}$ .

---

734 *Test Strength Characterization.* To determine the test strength, we use the second part of Theorem 1 as  
 735 well to quantify Type II errors. To this end, the false negative rate at the given confidence level  $1 - \alpha$   
 736 for a source-target pair  $(j \mapsto i)$  is given by  $\eta_{(j \mapsto i)}(\alpha) := F_{\chi^2(M^d, \hat{\nu}_{(j \mapsto i)})}(F_{\chi^2(M^d)}^{-1}(1 - \alpha))$  where  $F_{\chi^2(M^d, \hat{\nu}_{(j \mapsto i)})}(\cdot)$   
 737 denotes the non-central  $\chi^2$  distribution with  $M^d$  degrees of freedom and non-centrality parameter  $\hat{\nu}_{(j \mapsto i)}$ .  
 738 Given the false negative rate, we use the Youden's  $J$ -statistic (Youden, 1950) to summarize the strength of  
 739 the test as:

$$740 \quad J_{(j \mapsto i)} := 1 - \alpha - \eta_{(j \mapsto i)}(\alpha), \quad (15)$$

741 for the given confidence level  $1 - \alpha$ . The  $J$ -statistic has a value in the interval  $[0, 1]$  summarizing the  
 742 performance of a diagnostic test. When  $J_{(j \mapsto i)} \approx 0$ , the evidence to choose the alternative over the null

743 hypothesis is weak, i.e., the GC link is likely to be missing. On the other hand, when  $J_{(j \mapsto i)} \approx 1$ , both  
744 the false positive and negative rates are close to zero, implying high test strength, i.e., strong evidence in  
745 support of the GC link.

746 The overall statistical inference framework is summarized in Algorithm 1. Finally, obtaining the  $J$ -  
747 statistics for all links, we can construct the GC map  $\Phi$  as follows

$$748 \quad [\Phi]_{i,j} := \begin{cases} J_{(j \mapsto i)}, & (j \mapsto i) \in \mathcal{I} \\ 0, & \text{otherwise} \end{cases}. \quad (16)$$

749 It is worth noting that to repeatedly evaluate the de-biased deviance difference statistic, one needs to  
750 efficiently calculate the log-likelihood function  $\ell(\cdot)$ , which is done using the innovation form described in  
751 (Gupta and Mehra, 1974). In the spirit of easing reproducibility, a python implementation of the NLGC is  
752 available on the open source repository Github (Soleimani and Das, 2022).

#### 753 4.5. Dimensionality Reduction and VAR Model Order Selection

754 There are two remaining ingredients of NLGC which are key to ensure its scalability, namely, reducing  
755 the dimensionality of the source space and VAR model order selection.

##### 756 4.5.1. Source Space Construction and Eigenmode Decomposition

757 In practice, using MR scans of the participants, individual head models can be numerically computed  
758 and co-registered to each individual’s head using the digitized head shapes. We first define a cortical surface  
759 mesh-based source space for the ‘fsaverage’ head model (Dale et al., 1999), named `ico-4`, with average spacing  
760 of  $\sim 6$  mm between any two neighboring sources, which is then morphed to each participant’s head model.  
761 The lead-field matrix is obtained by placing 3 virtual dipoles at each of the 5124 vertices of `ico-4` source  
762 space and solving Maxwell’s equations. We further restrict the dipoles to be normal to the cortical surface,  
763 so that the resulting lead-field matrix  $\mathbf{C}$  has  $M = 5124$  columns of length  $N$  each (Gramfort et al., 2013a,  
764 2014). Solving the NLGC inverse problem over this source space is quite computationally demanding, as  
765 the computational time of FIS scales as  $\mathcal{O}\left(\left((rM)^2K\right)^3\right)$  (See Section 4.4.2). We thus need to reduce the  
766 dimension of the lead-field matrix to control the computational complexity.

767 To this end, we summarize the contribution of the dipoles placed on the `ico-4` source space vertices  
768 within a given region using their principal components (Limpiti et al., 2006; Cheung et al., 2010). We start  
769 from a coarse surface mesh-based source space, namely `ico-1`, with 84 vertices (42 vertices per hemisphere).  
770 We consider the Voronoi regions based on the geodesic distance between these vertices induced by `ico-1`  
771 vertices over the original `ico-4` vertices, so that all the `ico-4` vertices are partitioned into 84 non-overlapping  
772 patches (Babadi et al., 2014). The Voronoi regions around each of the `ico-1` vertices are referred to as *cortical*  
773 *patches* in this work. We then approximate the contribution of the dipoles placed on the `ico-4` vertices within  
774 each cortical patch by the first  $r$  leading eigenvectors of the partial lead-field matrix following singular value



775 decomposition (SVD). We refer to these leading eigenvectors as *eigenmodes*. As such, the number of columns  
 776 in the *effective* lead-field matrix is reduced to  $r \times 84$ , as opposed to original 5124, which significantly reduces  
 777 the computational complexity. In addition to providing computational savings, dimensionality reduction  
 778 through retaining the leading eigenmodes of the lead-field sub-matrices serves as denoising by suppressing  
 779 the effect of small lead-field errors (which are expected to appear in eigenmodes with small singular values).

780 Fig. 9 shows a schematic depiction of the eigenmode decomposition for a given patch with  $r = 2$   
 781 eigenmodes. For this example, the  $10 \times 7$  lead-field matrix of the cortical patch is reduced to a  $10 \times 2$   
 782 matrix, for which the two eigenmodes capture the main contributions of the patch to the MEG sensors. In  
 783 other words, we summarize all the dipoles placed on ico-4 vertices within each cortical patch by the best  $r$   
 784 *effective* dipoles, which explain most of the lead-field variance within that cortical patch. With increasing  $r$ ,  
 785 the approximation gets better in a similar way that a finer cortical mesh improves cortical current density  
 786 approximation. The parameter  $r$  can be chosen by controlling the reconstruction error at a desired level.  
 787 We will provide an example of this choice in the following subsection.

#### 788 4.5.2. VAR Model Order Selection

789 In Section 4.4, the VAR model order  $K$  is assumed to be known. To estimate  $K$  in a data-driven  
 790 fashion, we utilize the *Akaike Information Criterion* (AIC) to determine which model order best fits the  
 791 MEG observations (Ding et al., 2018). Given a set of candidate model orders  $\mathcal{K}$  for  $K$ , the optimal model  
 792 order can be chosen as:

$$793 K_{\text{AIC}} = \underset{K \in \mathcal{K}}{\operatorname{argmin}} -2\ell(\hat{\boldsymbol{\theta}}^{[K]}) + 2df,$$

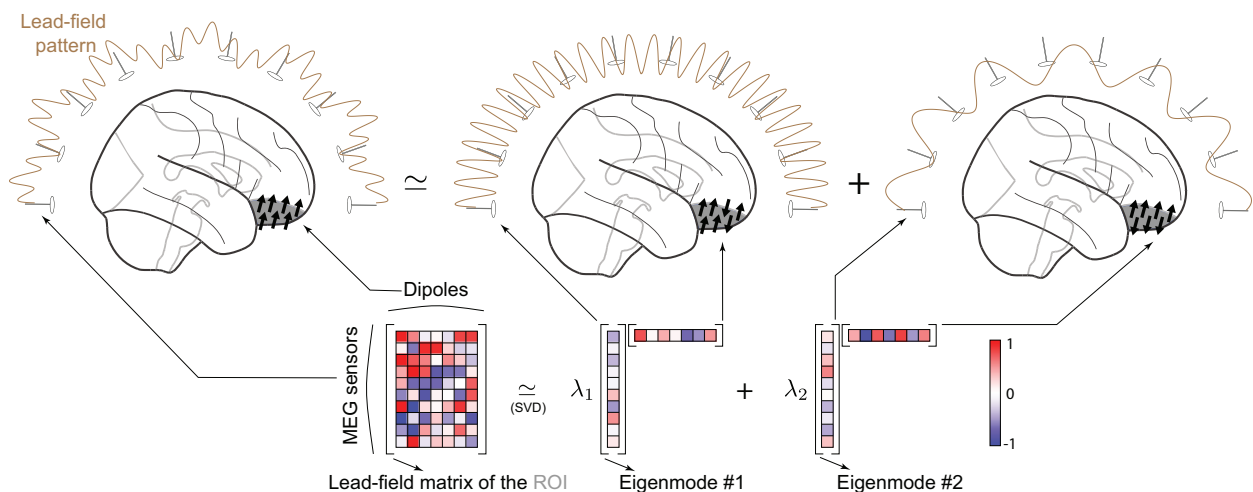

**Figure 9:** An illustration of low-rank approximation to the lead-field matrix using eigenmode decomposition using  $r = 2$  eigenmodes. The contribution of the 7 dipoles to 10 MEG sensors is originally captured by a  $10 \times 7$  sub-matrix of the lead-field matrix (left), whereas using the eigenmode decomposition, it can be approximated by two 10-dimensional eigenmodes (right), resulting in a  $10 \times 2$  effect sub-matrix.

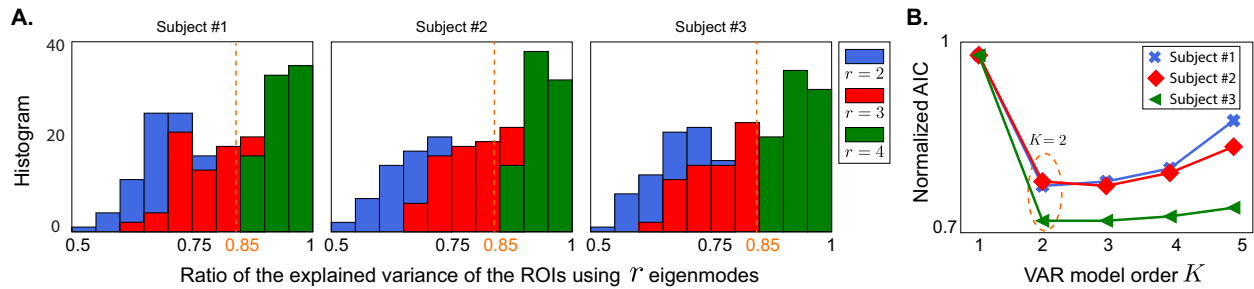

**Figure 10:** Model selection curves. **A.** Histogram of the ratio of the explained variance to total variance for all ROIs using  $r = 2, 3, 4$  eigenmodes for head models of three representative subjects. With  $r = 4$  eigenmodes, at least 85% of the variance can be explained for all ROIs. **B.** AIC curve for  $r = 4$  eigenmodes, suggesting a choice of  $K = 2$  for the VAR model order for the three representative subjects.

794 where  $df$  is the degrees of freedom of the  $\ell_1$ -norm regularized maximum likelihood problem (Zou et al., 2007)  
 795 and  $\hat{\theta}^{[K]}$  denotes the estimated parameters corresponding to a VAR( $K$ ) model.

796 Ideally, one can search within a large set of candidate values for  $K$  and  $r$  (number of eigenmodes) and  
 797 choose the optimal pair according to an information criterion (Ding et al., 2018). However, due to high  
 798 computational complexity of the estimation procedure in NLGC, especially for higher values of  $K$  and  $r$ ,  
 799 we first pick a suitable value for the number of eigenmodes  $r$ , followed by choosing the VAR model order  $K$   
 800 via AIC.

801 To choose  $r$ , we require that at least 85% of the variance within each ROI can be explained using  $r$   
 802 eigenmodes. Depending on the subject’s head model and also the location of the dipoles, the choice of  
 803  $r$  may vary. For the MEG data in this study,  $r = 4$  eigenmodes sufficed to capture at least 85% of the  
 804 variance. Fig. 10A shows the histogram of explained variance ratio for all ROIs using  $r = 2, 3, 4$  eigenmodes  
 805 corresponding to 3 representative subjects.

806 Once  $r = 4$  is fixed, we use AIC to pick the optimal value of  $K$ . For the MEG data in this study,  $K = 2$   
 807 was the optimal choice according to AIC for all subjects. Fig. 10B shows the AIC curves of the same 3  
 808 subjects as in panel A. Even though in some cases (e.g. subject 2), a choice of  $K = 3$  results in a slight  
 809 improvement compared to  $K = 2$ , to reduce the overall run-time of our inference framework, we picked  
 810  $K = 2$  for all cases.

#### 811 4.6. MEG Experiments: Procedures and Recordings

812 The data analyzed in this study was a part of a larger experiment whose results will be reported sep-  
 813 arately. Out of 36 total participants who completed the MEG experiment, 24 participants completed the  
 814 structural MRI scans. Additionally, 2 subjects were excluded due to bad fiducials measurements. Ultimately,  
 815 22 subjects, 13 younger adults (5 males; mean age 21.1 years, range 17–26 years) and 9 older adults (3 males;  
 816 mean age 69.6 years, range 66–78 years) were included in the analysis. All participants had clinically normal  
 817 hearing (125–4000 Hz, hearing level  $\leq 25$  dB) and no history of neurological disorder.

818 The study was approved by the University of Maryland’s Institutional Review Board. All participants  
819 gave written informed consent and were compensated for their time. Subjects came in on two different days.  
820 MEG auditory task recording was performed on the first day and structural MRIs were scanned on the  
821 second day. Neural magnetic signals were recorded in a dimly lit, magnetically shielded room with 160 axial  
822 gradiometer whole head MEG system (KIT, Kanazawa, Japan) at the Maryland Neuroimaging Center. The  
823 MEG data were sampled at 2 kHz, low pass filtered at 200 Hz and notch filtered at 60 Hz. Participants  
824 laid supine position during the MEG experiment while their head was in the helmet and as close as possible  
825 to the sensors. The head position was tracked at the start and end of the experiment with 5 fiducial coils.  
826 During the task subjects were asked to stare at the center of the screen and minimize the body movements  
827 as much as possible.

828 The resting state data were recorded before and after the main auditory task, each 90 s long in duration.  
829 During the resting state subjects fixated at a red cross at the center of grey screen. 100 repetitions of 500  
830 Hz tone pips were presented at the end. During the tone pips task, subjects were staring at a face image at  
831 the center of screen and were asked to silently count the number of tone pips. The tones were presented at  
832 a duration of 400 ms with a variable interstimulus interval (1400 ms, 1200 ms, 1000 ms). The tone pip task  
833 was around 150 s long and was divided into two trials, 40 s after the beginning of the first tone pip onset  
834 resulting in two trials. In summary, we analyzed the GC link counts in resting state and listening to tone  
835 pips task, each consisted of two trials.

#### 836 *4.7. Pre-processing and Data Cleaning*

837 All the pre-processing procedures have been carried out using `MNE-python 0.21.0` (Gramfort et al.,  
838 2013a, 2014). After removing the noisy channels, temporal signal space separation (tsss) was used to remove  
839 the artifacts (Taulu and Simola, 2006). The data were filtered between 0.1 Hz and 100 Hz using a causal FIR  
840 filter (with `phase='minimum'` setting). Independent component analysis (extended Infomax algorithm, with  
841 `method='infomax'` and `fit_params=dict(extended=True)` settings) was applied to extract and remove  
842 cardiac and muscle artifacts (Bell and Sejnowski, 1995; Lee et al., 1999). The initial 5 seconds of the data  
843 were removed and the subsequent 40 seconds were extracted. Finally, the data were filtered to the desired  
844 frequency bands using causal FIR filters followed by downsampling to 50 Hz.

#### 845 *4.8. NLGC Parameter Settings*

846 As mentioned in Section 4.5.2, the VAR model order  $K$  is selected via AIC over a set of candidates  
847  $\mathcal{K} = \{1, 2, 3, 4, 5\}$ . The regularization parameter for the  $\ell_1$ -norm are chosen using a standard 5-fold cross-  
848 validation over the range  $[10^{-15}, 1]$  spanned by 25 logarithmically-spaced points (Appendix A.1, Remark  
849 3). As for the convergence of the EM algorithm, we used a normalized error tolerance of `tol = 10-5`, with a  
850 maximum number of 1000 iterations (Algorithm 2). For all simulation studies as well as real data analysis  
851 FDR was controlled at 0.1% using the BY procedure.

#### 852 4.8.1. Parameters for the Illustrative Example

853 We considered  $M = 84$  cortical patches, whose activities are projected onto the MEG sensor space with  
 854  $N = 155$  sensors. We simulated 3 different realizations (with  $T = 1000$  samples each) for each run. To  
 855 simplify the projection onto the MEG sensors, we considered a single lead-field vector for each cortical patch,  
 856 generated via drawing 155 independent samples from a standard normal distribution. This simplification  
 857 using a single lead-field vector per patch could be thought of as taking a random linear combination of all  
 858 the lead-field vectors within a cortical patch as the representative of its activity. The noise measurement  
 859 covariance matrix was assumed to be diagonal  $\mathbf{R} = \sigma^2 \mathbf{I}$  where  $\sigma^2$  was chosen to set the SNR at 0 dB.  
 860 The cortical patch activities were simulated as a VAR(5) process. Among them, 8 patches were randomly  
 861 selected to carry the dominant activities, i.e., explaining 90% of the total signal power. To compare the  
 862 performance of NLGC with a two-stage method using MNE, we first obtained the source estimates for the  
 863 first stage as:

$$864 \hat{\mathbf{x}}_{1:T} = \min_{\mathbf{x}_{1:T}} \sum_{t=1}^T \|\mathbf{x}_t\|_2^2 \quad \text{s.t.} \quad \sum_{t=1}^T \|\mathbf{y}_t - \mathbf{C}\mathbf{x}_t\|_2 \leq \zeta,$$

865 for some  $\zeta > 0$ . Given the source estimates, we then fit the VAR models to obtain the network parameters  
 866 (Appendix A.3). Then, the same statistical inference framework used in NLGC was applied to extract the  
 867 GC links in the second stage.

#### 868 4.8.2. Parameters for the Simulated MEG Data Using a Head-Based Model

869 We computed the forward solution for ico-4 source space from a representative younger subject's head  
 870 model via MNE-python 0.21.0 and then obtained the low-rank lead-field matrix approximation over ico-1  
 871 source space using the previously mentioned dimensionality reduction strategy (see Section 4.5.1 for details).  
 872 Each of the cortical patches corresponding to ico-1 vertices had  $r_{\text{gen.}}$  eigenmodes, resulting in  $84 \times r_{\text{gen.}}$  lead-  
 873 field columns, which are summarizing the contribution of 5124 ico-4 sources, partitioned into 84 groups  
 874 according to the Voronoi regions formed over the cortical manifold. As a result, in the generative model,  
 875 the lead-field matrix has  $M = 84 \times r_{\text{gen.}}$  columns and  $N = 155$  rows. The dipole activities  $\{\mathbf{x}_t\}_{t=1}^T$  were  
 876 generated using VAR(3) processes with  $T = 3000$  time points (3 segments, 1000 samples each). With  $\mathbf{g}_i^k$   
 877 denoting the  $k^{\text{th}}$  eigenmode of the  $i^{\text{th}}$  cortical patch, the MEG observation at time  $t$  is generated as

$$878 \mathbf{y}_t = \sum_{i=1}^{84} \left( \sum_{k=1}^{r_{\text{gen.}}} \gamma_i^k \mathbf{g}_i^k \right) x_{(i-1)r_{\text{gen.}}+k,t} + \mathbf{n}_t, \quad t = 1, 2, \dots, T,$$

879 where  $\gamma_i^k$  are drawn uniformly in the interval  $[-1, 1]$  and  $\mathbf{n}_t$  is a zero mean Gaussian random vector with  
 880 a diagonal covariance matrix  $\mathbf{R} = \sigma^2 \mathbf{I}$ . The value of  $\sigma^2$  is determined according to the desired SNR level  
 881 which is set to 0 dB, unless otherwise stated.

882 We considered varying numbers of dominant cortical patches,  $m = 2, 4, \dots, 20$  that explain 90% of the  
 883 total signal power. The remaining 10% of the signal power was uniformly distributed as white noise among

884 the rest of cortical patches. The true underlying GC network structure among the dominant cortical patches  
885 was assumed to have 20% sparsity, i.e., with  $m$  active cortical patches, there are  $\lceil 0.2m(m-1) \rceil$  true GC links,  
886 where  $\lceil z \rceil$  denotes the smallest integer greater than or equal to  $z$ . For each  $m$ , we generated 10 different  
887 trials of the VAR processes, while randomly selecting cortical patches from the temporal and frontal lobes  
888 for each trial.

889 In all the four cases considered to assess the robustness of the algorithms, we used  $r_{\text{est.}} = 2$ . To induce  
890 source model mismatch, we simply used  $r_{\text{gen.}} = 10$  ( $> r_{\text{est.}}$ ) eigenmodes for the data generation process.  
891 We also considered a relaxed link localization criterion in addition to the exact link localization criterion.  
892 The rationale behind the relaxed link localization criterion is as follows: Let  $(j \mapsto i)$  be a true GC link, and  
893 let  $N(i)$  denote the 6 nearest cortical patches to cortical patch  $i$  over the ico-1 source space. If instead the  
894 link  $(j' \mapsto i')$  is detected, we consider it a hit if  $i' \in N(i)$  and  $j' \in N(j)$ . This way, we account for minor  
895 spatial localization errors. Note that in the exact link localization criterion, the link  $(j \mapsto i)$  is considered a  
896 hit only if it is exactly detected by NLGC.

897 The NLGC settings were the same in all the aforementioned cases. For the two-stage methods, we used  
898 the standard MNE and dSPM methods as well as the Champagne algorithm implemented in MNE-python  
899 0.21.0 using their default settings to localize the simulated MEG data into cortical time-courses. For each  
900 value of  $m$ , we ran NLGC and the three two-stage procedures and evaluated the performance of each method  
901 by calculating the hit rate (number of true detected links normalized by the total number of true links) and  
902 false alarm rate (number of spurious links normalized by the total number of non-GC links), both averaged  
903 over the 10 trials.

#### 904 4.8.3. Parameters in the Analysis of Experimentally Recorded MEG Data

905 For the MEG data that were recorded during an auditory task, we analyzed the connectivity between  
906 ROIs in frontal, temporal, and parietal lobes (in both hemispheres) that broadly comprise the auditory  
907 cortex, the fronto-parietal network, the cingulo-opercular network, the ventral attention network, and the  
908 default mode network, which are known to fluctuate with task versus rest conditions (Fox et al., 2005) and  
909 with aging (Kuchinsky and Vaden, 2020). The included ROIs are selected from the 68 anatomical ROIs in  
910 the Desikan-Killiany atlas (Desikan et al., 2006):

- 911 • Frontal: ‘rostralmiddlefrontal’, ‘caudalmiddlefrontal’, ‘parsopercularis’, ‘parstriangularis’.
- 912 • Temporal: ‘superiortemporal’, ‘middletemporal’, ‘transversetemporal’.
- 913 • Parietal: ‘inferiorparietal’, ‘posteriorcingulate’.

914 We then mapped the 84 cortical patches onto these 68 anatomical ROIs. To illustrate this procedure,  
915 consider the example given in Fig. 11. There are three representative cortical patches, denoted by  $d_k$ ,  $k =$   
916 1, 2, 3 with corresponding vertices in ico-1 (crosses) and ico-4 (arrows) mesh are shown with the same color.

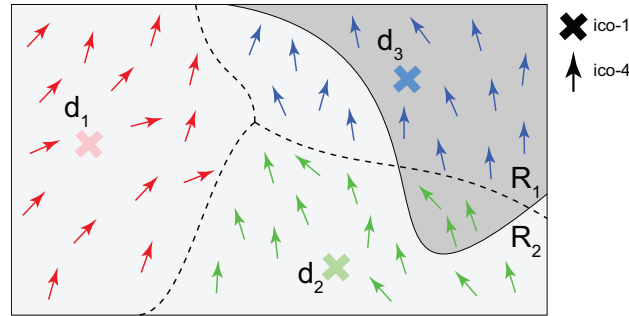

**Figure 11:** Illustration of anatomical ROI to cortical patch assignment. Three ico-1 vertices shown as  $d_1$  (red  $\times$ ),  $d_2$  (green  $\times$ ) and  $d_3$  (blue  $\times$ ) as well as the corresponding ico-4 vertices (colored arrows) in the respective patches are shown with the same color coding. Two anatomical ROIs  $R_1$  (dark grey) and  $R_2$  (light grey) are also highlighted. Using the proposed association scheme, each cortical patch is assigned a pair of weights indicating its relative overlap with the two ROIs. Here, the association weights of  $d_1$ ,  $d_2$  and  $d_3$  are given by  $(0, 1)$ ,  $(0.2, 0.8)$  and  $(0.67, 0.33)$ , respectively.

917 The goal is to allocate the representative cortical patches between the two ROIs marked by  $R_1$  and  $R_2$ . For  
 918 each representative cortical patch, we compare the ratio of the number of ico-4 vertices that lie within each  
 919 ROI and use it as an association weight between the representative cortical patch and the ROI. For the given  
 920 example in Fig. 11, the association weights to  $R_1$  and  $R_2$  for the three representative cortical patches  $d_1$ ,  $d_2$ ,  
 921  $d_3$  are given by  $(0, 1)$ ,  $(0.2, 0.8)$ , and  $(0.67, 0.33)$ , respectively. Using this many-to-one mapping, the obtained  
 922 NLGC map  $\Phi$ , which represents the GC links among the ico-1 cortical patches, can be translated into a  
 923 connectivity map among the 68 ROIs as follows. Let  $\mathbf{W} \in \mathbb{R}^{84 \times 68}$  denote the aforementioned association  
 924 weight matrix, where  $[\mathbf{W}]_{i,j}$  is the association weight of the  $i^{\text{th}}$  representative cortical patch to the  $j^{\text{th}}$  ROI.  
 925 The transformed connectivity map  $\tilde{\Phi}$  is then defined as  $\tilde{\Phi} = \mathbf{W}^{\top} \Phi \mathbf{W}$ .

926 As an example of this transformation, consider the setting of Fig. 11 and suppose that NLGC only  
 927 detects one GC link ( $d_2 \mapsto d_2$ ). Assuming that there are only 3 patches  $d_1$ ,  $d_2$ , and  $d_3$  in the model, we  
 928 have:

$$929 \quad \Phi = \begin{bmatrix} 0 & 0 & 0 \\ 0 & 1 & 0 \\ 0 & 0 & 0 \end{bmatrix}, \quad \mathbf{W} = \begin{bmatrix} 0 & 1 \\ 0.2 & 0.8 \\ 0.67 & 0.33 \end{bmatrix},$$

930 where the weight matrix  $\mathbf{W}$  contains the association weights of the setting in Fig. 11. The transformed  
 931 connectivity matrix is thus given by:

$$932 \quad \tilde{\Phi} = \mathbf{W}^{\top} \Phi \mathbf{W} = \begin{bmatrix} 0.04 & 0.16 \\ 0.16 & 0.64 \end{bmatrix}.$$

933 We can then interpret  $\tilde{\Phi}$  as follows: the captured link ( $d_2 \mapsto d_2$ ) is decomposed into several possible links  
 934 between the 2 anatomical ROIs  $R_1$  and  $R_2$ , namely  $(R_1 \mapsto R_1)$  with a weight of 0.04,  $(R_1 \mapsto R_2)$  with a  
 935 weight of 0.16,  $(R_2 \mapsto R_1)$  with a weight of 0.16, and  $(R_2 \mapsto R_2)$  with a weight of 0.64. Notably, the elements

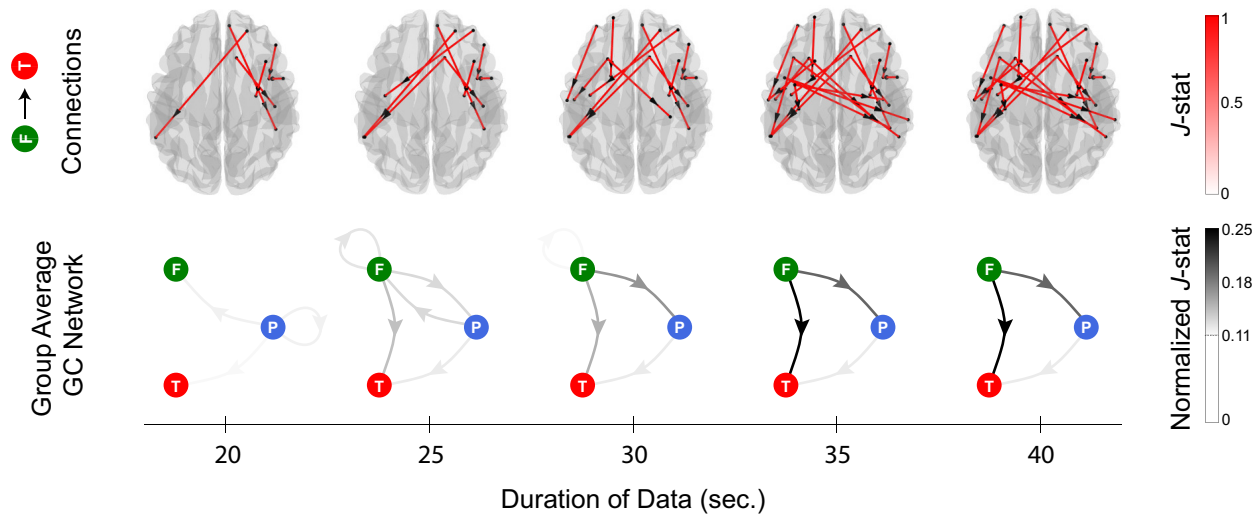

**Figure 12:** Evaluating the effect of trial duration on the NLGC performance. The group average GC links from frontal to temporal areas for younger participants during tone processing are overlaid on the dorsal brain plot in the top row. The corresponding directed graphs indicating the normalized  $J$ -statistics of the links between frontal, temporal, and parietal areas are shown in the bottom row. Columns correspond to different choices of  $T$  corresponding to the first 20, 25, 30, 35 and 40 s of the data. While for smaller values of  $T$ , several links are missing, by increasing  $T$  beyond 30 s the detected networks stabilize and converge.

936 of  $\tilde{\Phi}$  add up to one, which guarantees that the link ( $d_2 \mapsto d_2$ ) is not double-counted under the many-to-one  
 937 mapping from the patches to anatomical ROIs, and thus the total number of GC links is preserved.

938 The VAR model order and the number of eigenmodes are chosen as  $K = 2$  and  $r = 4$  using AIC  
 939 criterion. The details of the model selection is described in Section 4.5.2. To obtain the directed networks  
 940 between frontal, temporal, and parietal areas, for each of the Delta+Theta and Beta frequency bands  
 941 of interest, we encoded the inferred connectivity maps for each subject in each trial and condition using  
 942 a 9-dimensional vector, where each entry represented the number of detected GC links corresponding to  
 943 the connectivity types  $A \mapsto B$  where  $A, B \in \{\text{Frontal, Temporal, Parietal}\}$ . For the inter- vs. intra-  
 944 hemispheric refinement of our analysis, encoded the GC maps using a 36-dimensional vector in which the  
 945 entries also distinguished between the connectivity across and within hemispheres, i.e.,  $A(h) \mapsto B(h)$  where  
 946  $h \in \{\text{left hemisphere, right hemisphere}\}$  and  $A, B \in \{\text{Frontal, Temporal, Parietal}\}$ .

947 Another key parameter that may affect the performance of NLGC is the choice of the trial duration  $T$ . To  
 948 investigate the effect of the trial duration on the performance of NLGC, we repeated NLGC analysis using  
 949 different values of  $T$  corresponding to the first 20, 25,  $\dots$ , 40 seconds of the data. The results corresponding  
 950 to the younger participants under the tone processing condition over the Delta+Theta band is shown are  
 951 Fig. 12. As it can be observed from the figure, for small values of  $T$  the detected networks are quite sparse,  
 952 as the algorithm does not have enough statistical power to detect all relevant links. It is worth noting that  
 953 NLGC did not capture any GC links using only the first 10 seconds of the data. For  $\sim 30$  s and higher, the



954 captured GC network stabilizes and converges. Therefore, the choice of 40 s used in our analysis is taken  
955 conservatively to make sure that enough data points are available for GC link detection.

#### 956 4.8.4. Statistical Testing

957 We used generalized linear mixed effect models (GLMM) to analyze the effects of age, condition, connectivity  
958 type and hemisphere on the GC link counts for each frequency band. The statistical analysis was conducted  
959 via R version 4.0.5 (R core Team 2021) using glmmTMB (Brooks et al., 2017) with zero-inflated generalized  
960 Poisson distributions to model the link counts. Based on a full model accounting for all the variables, the  
961 best fit model was selected by stepwise elimination, implemented in buildglmmTMB Voeten (2021) based  
962 on the likelihood ratio test (LRT). Model assumptions for dispersion, heteroskedasticity and zero-inflation  
963 were examined and verified using the DHARMA package (Hartig, 2021). The post-hoc differences among  
964 the levels of the effects were tested using pairwise comparisons based on estimated marginal means, with  
965 Holm corrections using the package emmeans Lenth (2021). The summary of the statistical models is given  
966 in Appendix C.

## 967 5. Acknowledgments

968 This work was supported in part by the National Science Foundation Awards No. OISE2020624,  
969 SMA1734892 and CCF1552946 and the National Institutes of Health Awards. No. R01-DC019394, R01-  
970 DC014085, P01-AG055365, and R21-AG068802.

## 971 References

- 972 Abrams, D.A., Ryali, S., Chen, T., Chordia, P., Khouzam, A., Levitin, D.J., Menon, V., 2013. Inter-subject synchronization of  
973 brain responses during natural music listening. *European Journal of Neuroscience* 37, 1458–1469. [https://doi.org/10.1111/  
974 ejn.12173](https://doi.org/10.1111/ejn.12173).
- 975 Anderson, B.D., Moore, J.B., 2005. *Optimal filtering*. Dover Publications, Inc.
- 976 Andrews-Hanna, J.R., Snyder, A.Z., Vincent, J.L., Lustig, C., Head, D., Raichle, M., Buckner, R.L., 2007. Disruption of  
977 large-scale brain systems in advanced aging. *Neuron* 56, 924–935. <https://doi.org/10.1016/j.neuron.2007.10.038>.
- 978 Antzoulatos, E.G., Miller, E.K., 2016. Synchronous beta rhythms of frontoparietal networks support only behaviorally relevant  
979 representations. *elife* 5, e17822. <https://doi.org/10.7554/eLife.17822>.
- 980 Azarmi, F., Miri Ashtiani, S.N., Shalhaf, A., Behnam, H., Daliri, M.R., 2019. Granger causality analysis in combination with  
981 directed network measures for classification of ms patients and healthy controls using task-related fMRI. *Computers in  
982 Biology and Medicine* 115, 103495. <https://doi.org/10.1016/j.combiomed.2019.103495>.
- 983 Ba, D., Babadi, B., Purdon, P.L., Brown, E.N., 2014. Convergence and stability of iteratively re-weighted least squares  
984 algorithms. *IEEE Transactions on Signal Processing* 62, 183–195. <https://doi.org/10.1109/TSP.2013.2287685>.
- 985 Babadi, B., Obregon-Henao, G., Lamus, C., Hämäläinen, M.S., Brown, E.N., Purdon, P.L., 2014. A subspace pursuit-based  
986 iterative greedy hierarchical solution to the neuromagnetic inverse problem. *NeuroImage* 87, 427–443. [https://doi.org/10.  
987 1016/j.neuroimage.2013.09.008](https://doi.org/10.1016/j.neuroimage.2013.09.008).
- 988 Baillet, S., Mosher, J.C., Leahy, R.M., 2001. Electromagnetic brain mapping. *IEEE Signal processing magazine* 18, 14–30.  
989 <https://doi.org/10.1109/79.962275>.
- 990 Baar, E., Baar-Eroglu, C., Karaka, S., Schürmann, M., 2001. Gamma, alpha, delta, and theta oscillations govern cognitive  
991 processes. *International Journal of Psychophysiology* 39, 241–248. [https://doi.org/10.1016/S0167-8760\(00\)00145-8](https://doi.org/10.1016/S0167-8760(00)00145-8).
- 992 Beck, A., Teboulle, M., 2009. A fast iterative shrinkage-thresholding algorithm for linear inverse problems. *SIAM journal on  
993 imaging sciences* 2, 183–202. <https://doi.org/10.1137/080716542>.
- 994 Bell, A.J., Sejnowski, T.J., 1995. An information-maximization approach to blind separation and blind deconvolution. *Neural  
995 computation* 7, 1129–1159. <https://doi.org/10.1162/neco.1995.7.6.1129>.
- 996 Benjamini, Y., Yekutieli, D., 2001. The control of the false discovery rate in multiple testing under dependency. *The Annals  
997 of Statistics* 29, 1165–1188. <https://doi.org/10.1214/aos/1013699998>.

- 998 Blanco-Elorrieta, E., Emmorey, K., Pykkänen, L., 2018. Language switching decomposed through MEG and evidence from  
999 bimodal bilinguals. *Proceedings of the National Academy of Sciences* 115, 9708–9713. <https://doi.org/10.1073/pnas.1809779115>.
- 1001 Bolstad, A., Van Veen, B.D., Nowak, R., 2011. Causal network inference via group sparse regularization. *IEEE Transactions*  
1002 *on Signal Processing* 59, 2628–2641. <https://doi.org/10.1109/TSP.2011.2129515>.
- 1003 Bressler, S.L., Seth, A.K., 2011. Wiener-Granger causality: A well established methodology. *NeuroImage* 58, 323–329.  
1004 <https://doi.org/10.1016/j.neuroimage.2010.02.059>.
- 1005 Brookes, M.J., Tewarie, P.K., Hunt, B.A., Robson, S.E., Gascoyne, L.E., Liddle, E.B., Liddle, P.F., Morris, P.G., 2016. A multi-  
1006 layer network approach to MEG connectivity analysis. *NeuroImage* 132, 425–438. <https://doi.org/10.1016/j.neuroimage.2016.02.045>.
- 1007 Brooks, M.E., Kristensen, K., van Benthem, K.J., Magnusson, A., Berg, C.W., Nielsen, A., Skaug, H.J., Mächler, M., Bolker,  
1008 B.M., 2017. glmmTMB Balances Speed and Flexibility Among Packages for Zero-inflated Generalized Linear Mixed Mod-  
1009 eling. *The R Journal* 9, 378–400. <https://doi.org/10.32614/RJ-2017-066>.
- 1010 Brown, S., Nicholls, M.E., 1997. Hemispheric asymmetries for the temporal resolution of brief auditory stimuli. *Perception &*  
1011 *psychophysics* 59, 442–447. <https://doi.org/10.3758/BF03211910>.
- 1012 Buschman, T.J., Miller, E.K., 2007. Top-down versus bottom-up control of attention in the prefrontal and posterior parietal  
1013 cortices. *science* 315, 1860–1862. <https://doi.org/10.1126/science.1138071>.
- 1014 Cai, C., Hashemi, A., Diwakar, M., Haufe, S., Sekihara, K., Nagarajan, S.S., 2021. Robust estimation of noise for electromag-  
1015 netic brain imaging with the champagne algorithm. *NeuroImage* 225, 117411. <https://doi.org/10.1016/j.neuroimage.2020.117411>.
- 1016 Cai, C., Sekihara, K., Nagarajan, S.S., 2018. Hierarchical multiscale bayesian algorithm for robust MEG/EEG source recon-  
1017 struction. *NeuroImage* 183, 698–715. <https://doi.org/10.1016/j.neuroimage.2018.07.056>.
- 1018 Chen, F., Ke, J., Qi, R., Xu, Q., Zhong, Y., Liu, T., Li, J., Zhang, L., Lu, G., 2018. Increased inhibition of the amygdala by  
1019 the mPFC may reflect a resilience factor in post-traumatic stress disorder: A resting-state fMRI Granger causality analysis.  
1020 *Frontiers in Psychiatry* 9, 516. <https://doi.org/10.3389/fpsy.2018.00516>.
- 1021 Cheung, B.L.P., Riedner, B.A., Tononi, G., Van Veen, B.D., 2010. Estimation of cortical connectivity from EEG using  
1022 state-space models. *IEEE Transactions on Biomedical Engineering* 57, 2122–2134. <https://doi.org/10.1109/TBME.2010.2050319>.
- 1023 Cheung, B.L.P., Van Veen, B.D., 2011. Estimation of cortical connectivity from E/MEG using nonlinear state-space models, in:  
1024 2011 IEEE International Conference on Acoustics, Speech and Signal Processing (ICASSP), pp. 769–772. <https://doi.org/10.1109/ICASSP.2011.5946517>.
- 1025 Cho, J.H., Vorwerk, J., Wolters, C.H., Knösche, T.R., 2015. Influence of the head model on EEG and MEG source connectivity  
1026 analyses. *NeuroImage* 110, 60–77. <https://doi.org/10.1016/j.neuroimage.2015.01.043>.
- 1027 Cope, T.E., Sohoglu, E., Sedley, W., Patterson, K., Jones, P., Wiggins, J., Dawson, C., Grube, M., Carlyon, R., Griffiths,  
1028 T., et al., 2017. Evidence for causal top-down frontal contributions to predictive processes in speech perception. *Nature*  
1029 *Communications* 8, 1–16. <https://doi.org/10.1038/s41467-017-01958-7>.
- 1030 Da Silva, F.L., 2009. EEG: origin and measurement, in: *EEG-fMRI*. Springer, pp. 19–38. [https://doi.org/10.1007/978-3-540-87919-0\\_2](https://doi.org/10.1007/978-3-540-87919-0_2).
- 1031 Dale, A.M., Fischl, B., Sereno, M.I., 1999. Cortical surface-based analysis: I. segmentation and surface reconstruction. *Neu-  
1032 roimage* 9, 179–194. <https://doi.org/10.1006/nimg.1998.0395>.
- 1033 Dale, A.M., Liu, A.K., Fischl, B.R., Buckner, R.L., Belliveau, J.W., Lewine, J.D., Halgren, E., 2000. Dynamic statisti-  
1034 cal parametric mapping: Combining fMRI and MEG for high-resolution imaging of cortical activity. *Neuron* 26, 55–67.  
1035 [https://doi.org/10.1016/S0896-6273\(00\)81138-1](https://doi.org/10.1016/S0896-6273(00)81138-1).
- 1036 Das, P., Babadi, B., 2021. Non-asymptotic guarantees for robust identification of Granger causality via the lasso. arXiv preprint  
1037 URL: <https://arxiv.org/abs/2103.02774>.
- 1038 Daube, C., Gross, J., Ince, R.A., 2022. A whitening approach for transfer entropy permits the application to narrow-band  
1039 signals. arXiv preprint URL: <https://arxiv.org/abs/2201.02461>.
- 1040 David, O., Kiebel, S.J., Harrison, L.M., Mattout, J., Kilner, J.M., Friston, K.J., 2006a. Dynamic causal modeling of evoked  
1041 responses in EEG and MEG. *NeuroImage* 30, 1255–1272. <https://doi.org/10.1016/j.neuroimage.2005.10.045>.
- 1042 David, O., Kilner, J.M., Friston, K.J., 2006b. Mechanisms of evoked and induced responses in MEG/EEG. *NeuroImage* 31,  
1043 1580–1591. <https://doi.org/10.1016/j.neuroimage.2006.02.034>.
- 1044 Davidson, R., MacKinnon, J.G., 1987. Implicit alternatives and the local power of test statistics. *Econometrica* 55, 1305–1329.  
1045 <https://doi.org/10.2307/1913558>.
- 1046 Davidson, R.R., Lever, W.E., 1970. The limiting distribution of the likelihood ratio statistic under a class of local alternatives.  
1047 *Sankhyā: The Indian Journal of Statistics, Series A (1961-2002)* 32, 209–224. URL: <https://www.jstor.org/stable/25049656>.
- 1048 Dempster, A.P., Laird, N.M., Rubin, D.B., 1977. Maximum likelihood from incomplete data via the EM algorithm. *Journal of*  
1049 *the Royal Statistical Society: Series B (Methodological)* 39, 1–22. <https://doi.org/10.1111/j.2517-6161.1977.tb01600.x>.
- 1050 Deshpande, G., Hu, X., 2012. Investigating effective brain connectivity from fMRI data: Past findings and current issues with  
1051 reference to granger causality analysis. *Brain Connectivity* 2, 235–245. <https://doi.org/10.1089/brain.2012.0091>.
- 1052 Deshpande, G., LaConte, S., James, G.A., Peltier, S., Hu, X., 2009. Multivariate Granger causality analysis of fMRI data.  
1053 *Human Brain Mapping* 30, 1361–1373. <https://doi.org/10.1002/hbm.20606>.
- 1054 Desikan, R.S., Sgonne, F., Fischl, B., Quinn, B.T., Dickerson, B.C., Blacker, D., Buckner, R.L., Dale, A.M.,  
1055 Maguire, R.P., Hyman, B.T., Albert, M.S., Killiany, R.J., 2006. An automated labeling system for subdivid-  
1056 ing the human cerebral cortex on MRI scans into gyral based regions of interest. *NeuroImage* 31, 968–980.

- 1063 <https://doi.org/10.1016/j.neuroimage.2006.01.021>.
- 1064 Di Liberto, G.M., Lalor, E.C., Millman, R.E., 2018. Causal cortical dynamics of a predictive enhancement of speech intelligi-  
1065 bility. *NeuroImage* 166, 247–258. <https://doi.org/10.1016/j.neuroimage.2017.10.066>.
- 1066 Ding, J., Tarokh, V., Yang, Y., 2018. Model selection techniques: An overview. *IEEE Signal Processing Magazine* 35, 16–34.  
1067 <https://doi.org/10.1109/MSP.2018.2867638>.
- 1068 Ding, L., Worrell, G.A., Lagerlund, T.D., He, B., 2007. Ictal source analysis: Localization and imaging of causal interactions  
1069 in humans. *NeuroImage* 34, 575–586. <https://doi.org/10.1016/j.neuroimage.2006.09.042>.
- 1070 Dolcos, F., Rice, H.J., Cabeza, R., 2002. Hemispheric asymmetry and aging: right hemisphere decline or asymmetry reduction.  
1071 *Neuroscience & Biobehavioral Reviews* 26, 819–825. [https://doi.org/10.1016/S0149-7634\(02\)00068-4](https://doi.org/10.1016/S0149-7634(02)00068-4).
- 1072 Dong, M., Xia, L., Lu, M., Li, C., Xu, K., Zhang, L., 2019. A failed top-down control from the prefrontal cortex to the  
1073 amygdala in generalized anxiety disorder: Evidence from resting-state fMRI with Granger causality analysis. *Neuroscience*  
1074 *Letters* 707, 134314. <https://doi.org/10.1016/j.neulet.2019.134314>.
- 1075 Duggento, A., Passamonti, L., Valenza, G., Barbieri, R., Guerrisi, M., Toschi, N., 2018. Multivariate Granger causality unveils  
1076 directed parietal to prefrontal cortex connectivity during task-free MRI. *Scientific reports* 8, 1–11. <https://doi.org/10.1038/s41598-018-23996-x>.
- 1077 Endemann, C.M., Krause, B.M., Nourski, K.V., Banks, M.I., Veen, B.V., 2022. Multivariate autoregressive model estimation for  
1078 high-dimensional intracranial electrophysiological data. *NeuroImage* 254, 119057. <https://doi.org/10.1016/j.neuroimage.2022.119057>.
- 1079 Engemann, D.A., Gramfort, A., 2015. Automated model selection in covariance estimation and spatial whitening of MEG and  
1080 EEG signals. *NeuroImage* 108, 328–342. <https://doi.org/10.1016/j.neuroimage.2014.12.040>.
- 1081 Farokhzadi, M., Hossein-Zadeh, G.A., Soltanian-Zadeh, H., 2018. Nonlinear effective connectivity measure based on adaptive  
1082 neuro fuzzy inference system and Granger causality. *NeuroImage* 181, 382–394. <https://doi.org/10.1016/j.neuroimage.2018.07.024>.
- 1083 Fleck, J.I., Kutl, J., Brown, J., Mahon, J.R., Gayda-Chelder, C., 2016. Frontal-posterior coherence and cognitive function in  
1084 older adults. *International Journal of Psychophysiology* 110, 217–230. <https://doi.org/10.1016/j.ijpsycho.2016.07.501>.
- 1085 Fox, M.D., Snyder, A.Z., Vincent, J.L., Corbetta, M., Van Essen, D.C., Raichle, M.E., 2005. The human brain is intrinsically  
1086 organized into dynamic, anticorrelated functional networks. *Proceedings of the National Academy of Sciences* 102, 9673–9678.  
1087 <https://doi.org/10.1073/pnas.0504136102>.
- 1088 Fukushima, M., Yamashita, O., Knösche, T.R., Sato, M., 2015. MEG source reconstruction based on identification of directed  
1089 source interactions on whole-brain anatomical networks. *NeuroImage* 105, 408–427. <https://doi.org/10.1016/j.neuroimage.2014.09.066>.
- 1090 Gao, Y., Wang, X., Potter, T., Zhang, J., Zhang, Y., 2020. Single-trial EEG emotion recognition using Granger causal-  
1091 ity/transfer entropy analysis. *Journal of Neuroscience Methods* 346, 108904. <https://doi.org/10.1016/j.jneumeth.2020.108904>.
- 1092 van de Geer, S., Bühlmann, P., Ritov, Y., Dezeure, R., 2014. On asymptotically optimal confidence regions and tests for  
1093 high-dimensional models. *The Annals of Statistics* 42, 1166 – 1202. <https://doi.org/10.1214/14-AOS1221>.
- 1094 Geweke, J., 1982. Measurement of linear dependence and feedback between multiple time series. *J. Am. Stat. Assoc.* 77,  
1095 304–313. <https://doi.org/10.1080/01621459.1982.10477803>.
- 1096 Geweke, J.F., 1984. Measures of Conditional Linear Dependence and Feedback Between Time Series. *J. Am. Stat. Assoc.* 79,  
1097 907–915. <https://doi.org/10.1080/01621459.1984.10477110>.
- 1098 Goldstein, T., Studer, C., Baraniuk, R., 2014. A field guide to forward-backward splitting with a FASTA implementation.  
1099 arXiv preprint URL: <https://arxiv.org/abs/1411.3406>.
- 1100 Gorodnitsky, I.F., George, J.S., Rao, B.D., 1995. Neuromagnetic source imaging with FOCUSS: a recursive weighted min-  
1101 imum norm algorithm. *Electroencephalography and Clinical Neurophysiology* 95, 231–251. [https://doi.org/10.1016/0013-4694\(95\)00107-A](https://doi.org/10.1016/0013-4694(95)00107-A).
- 1102 Gramfort, A., Luessi, M., Larson, E., Engemann, D., Strohmeier, D., Brodbeck, C., Goj, R., Jas, M., Brooks, T., Parkko-  
1103 nen, L., Hämäläinen, M., 2013a. MEG and EEG data analysis with MNE-Python. *Frontiers in Neuroscience* 7, 267.  
1104 <https://doi.org/10.3389/fnins.2013.00267>.
- 1105 Gramfort, A., Luessi, M., Larson, E., Engemann, D.A., Strohmeier, D., Brodbeck, C., Parkkonen, L., Hämäläinen, M.S., 2014.  
1106 MNE software for processing MEG and EEG data. *NeuroImage* 86, 446–460. <https://doi.org/10.1016/j.neuroimage.2013.10.027>.
- 1107 Gramfort, A., Strohmeier, D., Haueisen, J., Hämäläinen, M.S., Kowalski, M., 2013b. Time-frequency mixed-norm estimates:  
1108 Sparse M/EEG imaging with non-stationary source activations. *NeuroImage* 70, 410–422. <https://doi.org/10.1016/j.neuroimage.2012.12.051>.
- 1109 Granger, C.W.J., 1969. Investigating Causal Relations by Econometric Models and Cross-spectral Methods. *Econometrica* 37,  
1110 424–438. URL: <http://www.jstor.org/stable/1912791>.
- 1111 Greene, W.H., 2003. *Econometric Analysis*. 5th ed., Pearson Education, Inc.
- 1112 Gupta, N., Mehra, R., 1974. Computational aspects of maximum likelihood estimation and reduction in sensitivity function  
1113 calculations. *IEEE Transactions on Automatic Control* 19, 774–783. <https://doi.org/10.1109/TAC.1974.1100714>.
- 1114 Hämäläinen, M., Hari, R., Ilmoniemi, R.J., Knuutila, J., Lounasmaa, O.V., 1993. Magnetoencephalography theory, instru-  
1115 mentation, and applications to noninvasive studies of the working human brain. *Reviews of modern Physics* 65, 413.  
1116 <https://doi.org/10.1103/RevModPhys.65.413>.
- 1117 Hämäläinen, M.S., Ilmoniemi, R.J., 1994. Interpreting magnetic fields of the brain: minimum norm estimates. *Medical &*  
1118 *biological engineering & computing* 32, 35–42. <https://doi.org/10.1007/BF02512476>.
- 1119 Hartig, F., 2021. DHARMa: Residual Diagnostics for Hierarchical (Multi-Level / Mixed) Regression Models. GitHub Reposi-

- tory. URL: <http://florianhartig.github.io/DHARMA/>.
- Hauk, O., Stenroos, M., Treder, M., 2019. EEG/MEG source estimation and spatial filtering: the linear toolkit, in: *Magnetoencephalography: from signals to dynamic cortical networks*. Springer, pp. 167–203. [https://doi.org/10.1007/978-3-030-00087-5\\_85](https://doi.org/10.1007/978-3-030-00087-5_85).
- Haykin, S.S., 2013. *Adaptive filter theory*. 5th ed., Pearson.
- Hejazi, M., Nasrabadi, A.M., 2019. Prediction of epilepsy seizure from multi-channel electroencephalogram by effective connectivity analysis using Granger causality and directed transfer function methods. *Cognitive neurodynamics* 13, 461–473. <https://doi.org/10.1007/s11571-019-09534-z>.
- Henry, M.J., Herrmann, B., Kunke, D., Obleser, J., 2017. Aging affects the balance of neural entrainment and top-down neural modulation in the listening brain. *Nature Communications* 8, 15801. <https://doi.org/10.1038/ncomms15801>.
- Hui, H.B., Leahy, R., 2006. Linearly constrained MEG beamformers for MVAR modeling of cortical interactions, in: *3rd IEEE International Symposium on Biomedical Imaging: Nano to Macro, 2006.*, pp. 237–240. <https://doi.org/10.1109/ISBI.2006.1624896>.
- Johansen, S., 1995. *Likelihood-based inference in cointegrated vector autoregressive models*. Oxford University Press.
- Jong, P.D., Mackinnon, M.J., 1988. Covariances for smoothed estimates in state space models. *Biometrika* 75, 601–602.
- Kim, S., Putrino, D., Ghosh, S., Brown, E.N., 2011. A Granger causality measure for point process models of ensemble neural spiking activity. *PLOS Computational Biology* 7, 1–13. <https://doi.org/10.1371/journal.pcbi.1001110>.
- Krishnaswamy, P., Obregon-Henao, G., Ahveninen, J., Khan, S., Babadi, B., Iglesias, J.E., Hämäläinen, M.S., Purdon, P.L., 2017. Sparsity enables estimation of both subcortical and cortical activity from MEG and EEG. *Proceedings of the National Academy of Sciences* 114, E10465–E10474. <https://doi.org/10.1073/pnas.1705414114>.
- Kuchinsky, S.E., Vaden, K.I., 2020. Aging, hearing loss, and listening effort: Imaging studies of the aging listener, in: *Aging and Hearing: Causes and Consequences*. Springer International Publishing, pp. 231–256. [https://doi.org/10.1007/978-3-030-49367-7\\_10](https://doi.org/10.1007/978-3-030-49367-7_10).
- Lamus, C., Hämäläinen, M.S., Temereanca, S., Brown, E.N., Purdon, P.L., 2012. A spatiotemporal dynamic distributed solution to the MEG inverse problem. *NeuroImage* 63, 894–909. <https://doi.org/10.1016/j.neuroimage.2011.11.020>.
- Lee, T.W., Girolami, M., Sejnowski, T.J., 1999. Independent component analysis using an extended infomax algorithm for mixed subgaussian and supergaussian sources. *Neural computation* 11, 417–441. <https://doi.org/10.1162/089976699300016719>.
- Lenth, R.V., 2021. emmeans: Estimated Marginal Means, aka Least-Squares Means. URL: <https://CRAN.R-project.org/package=emmeans>.
- Lim, C., Yu, B., 2016. Estimation stability with cross-validation (escv). *Journal of Computational and Graphical Statistics* 25, 464–492. <https://doi.org/10.1080/10618600.2015.1020159>.
- Limpiti, T., Van Veen, B., Wakai, R., 2006. Cortical patch basis model for spatially extended neural activity. *IEEE Transactions on Biomedical Engineering* 53, 1740–1754. <https://doi.org/10.1109/TBME.2006.873743>.
- Limpiti, T., Van Veen, B.D., Attias, H.T., Nagarajan, S.S., 2009. A spatiotemporal framework for estimating trial-to-trial amplitude variation in event-related MEG/EEG. *IEEE Transactions on Biomedical Engineering* 56, 633–645. <https://doi.org/10.1109/TBME.2008.2008423>.
- Liu, F., Stephen, E.P., Prerau, M.J., Purdon, P.L., 2019. Sparse multi-task inverse covariance estimation for connectivity analysis in EEG source space, in: *2019 9th International IEEE/EMBS Conference on Neural Engineering (NER)*, pp. 299–302. <https://doi.org/10.1109/NER.2019.8717043>.
- Liu, Z., Shu, S., Lu, L., Ge, J., Gao, J.H., 2020. Spatiotemporal dynamics of predictive brain mechanisms during speech processing: an MEG study. *Brain and Language* 203, 104755. <https://doi.org/10.1016/j.bandl.2020.104755>.
- Lochmann, T., Deneve, S., 2011. Neural processing as causal inference. *Current Opinion in Neurobiology* 21, 774–781. <https://doi.org/10.1016/j.conb.2011.05.018>.
- Long, C., Purdon, P., Temereanca, S., Desai, N., Hamalainen, M., Brown, E., 2006. Large scale Kalman filtering solutions to the electrophysiological source localization problem- a MEG case study, in: *2006 International Conference of the IEEE Engineering in Medicine and Biology Society*, pp. 4532–4535. <https://doi.org/10.1109/IEMBS.2006.259537>.
- Long, C.J., Purdon, P.L., Temereanca, S., Desai, N.U., Hämäläinen, M.S., Brown, E.N., 2011. State-space solutions to the dynamic magnetoencephalography inverse problem using high performance computing. *The annals of applied statistics* 5, 1207. <https://doi.org/10.1214/11-AOAS483>.
- Lu, Q., Bi, K., Liu, C., Luo, G., Tang, H., Yao, Z., 2013. Predicting depression based on dynamic regional connectivity: A windowed Granger causality analysis of MEG recordings. *Brain Research* 1535, 52–60. <https://doi.org/10.1016/j.brainres.2013.08.033>.
- Malik, W.Q., Truccolo, W., Brown, E.N., Hochberg, L.R., 2010. Efficient decoding with steady-state kalman filter in neural interface systems. *IEEE Transactions on Neural Systems and Rehabilitation Engineering* 19, 25–34. <https://doi.org/10.1109/TNSRE.2010.2092443>.
- Malik, W.Q., Truccolo, W., Brown, E.N., Hochberg, L.R., 2011. Efficient decoding with steady-state Kalman filter in neural interface systems. *IEEE Transactions on Neural Systems and Rehabilitation Engineering* 19, 25–34. <https://doi.org/10.1109/TNSRE.2010.2092443>.
- Manomaisaowapak, P., Nartkulpat, A., Songsiri, J., 2021. Granger causality inference in EEG source connectivity analysis: A state-space approach. *IEEE Transactions on Neural Networks and Learning Systems* , 1–11 <https://doi.org/10.1109/TNNLS.2021.3096642>.
- Maurits, N.M., Scheeringa, R., van der Hoeven, J.H., de Jong, R., 2006. EEG coherence obtained from an auditory oddball task increases with age. *Journal of clinical neurophysiology* 23, 395–403. <https://doi.org/10.1097/01.wnp.0000219410.97922.4e>.
- Millen, S.J., Haughton, V.M., Yetkin, Z., 1995. Functional magnetic resonance imaging of the central auditory pathway following



- 1193 speech and pure-tone stimuli. *The Laryngoscope* 105, 1305–1310. <https://doi.org/10.1288/00005537-199512000-00008>.
- 1194 Moezzi, B., Pratti, L.M., Hordacre, B., Graetz, L., Berryman, C., Lavrencic, L.M., Ridding, M.C., Keage, H.A., McDonnell,  
1195 M.D., Goldsworthy, M.R., 2019. Characterization of young and old adult brains: An EEG functional connectivity analysis.  
1196 *Neuroscience* 422, 230–239. <https://doi.org/10.1016/j.neuroscience.2019.08.038>.
- 1197 Mosher, J.C., Leahy, R.M., Lewis, P.S., 1999. EEG and MEG: forward solutions for inverse methods. *IEEE Transactions on*  
1198 *biomedical engineering* 46, 245–259. <https://doi.org/10.1109/10.748978>.
- 1199 Müller, N., Schlee, W., Hartmann, T., Lorenz, I., Weisz, N., 2009. Top-down modulation of the auditory steady-state response  
1200 in a task-switch paradigm. *Frontiers in Human Neuroscience* 3, 1. <https://doi.org/10.3389/neuro.09.001.2009>.
- 1201 Murakami, S., Okada, Y., 2006. Contributions of principal neocortical neurons to magnetoencephalography and electroen-  
1202 cephalography signals. *The Journal of physiology* 575, 925–936. <https://doi.org/10.1113/jphysiol.2006.105379>.
- 1203 Nalatore, H., Ding, M., Rangarajan, G., 2009. Denoising neural data with state-space smoothing: method and application.  
1204 *Journal of neuroscience methods* 179, 131–141. <https://doi.org/10.1016/j.jneumeth.2009.01.013>.
- 1205 Owen, J.P., Wipf, D.P., Attias, H.T., Sekihara, K., Nagarajan, S.S., 2012. Performance evaluation of the Champagne  
1206 source reconstruction algorithm on simulated and real M/EEG data. *NeuroImage* 60, 305–323. <https://doi.org/10.1016/j.neuroimage.2011.12.027>.
- 1207  
1208 Palva, J.M., Wang, S.H., Palva, S., Zhigalov, A., Monto, S., Brookes, M.J., Schoffelen, J.M., Jerbi, K., 2018. Ghost in-  
1209 teractions in MEG/EEG source space: A note of caution on inter-areal coupling measures. *NeuroImage* 173, 632–643.  
1210 <https://doi.org/10.1016/j.neuroimage.2018.02.032>.
- 1211 Palva, S., Palva, J.M., 2012. Discovering oscillatory interaction networks with M/EEG: challenges and breakthroughs. *Trends*  
1212 *in Cognitive Sciences* 16, 219–230. <https://doi.org/10.1016/j.tics.2012.02.004>.
- 1213 Peelle, J.E., Troiani, V., Wingfield, A., Grossman, M., 2010. Neural processing during older adults comprehension of spoken  
1214 sentences: age differences in resource allocation and connectivity. *Cerebral Cortex* 20, 773–782. <https://doi.org/10.1093/cercor/bhp142>.
- 1215  
1216 Pirondini, E., Babadi, B., Obregon-Henao, G., Lamus, C., Malik, W.Q., Hämäläinen, M.S., Purdon, P.L., 2018. Computa-  
1217 tionally efficient algorithms for sparse, dynamic solutions to the EEG source localization problem. *IEEE Transactions on*  
1218 *Biomedical Engineering* 65, 1359–1372. <https://doi.org/10.1109/TBME.2017.2739824>.
- 1219 Roebroeck, A., Formisano, E., Goebel, R., 2005. Mapping directed influence over the brain using Granger causality and fMRI.  
1220 *NeuroImage* 25, 230–242. <https://doi.org/10.1016/j.neuroimage.2004.11.017>.
- 1221 Roebroeck, A., Formisano, E., Goebel, R., 2011. The identification of interacting networks in the brain using fMRI: Model  
1222 selection, causality and deconvolution. *NeuroImage* 58, 296–302. <https://doi.org/10.1016/j.neuroimage.2009.09.036>.
- 1223 Rosenberg, J., Dong, Q., Florin, E., Sripad, P., Boers, F., Reske, M., Shah, N.J., Dammers, J., 2021. Conflict processing  
1224 networks: A directional analysis of stimulus-response compatibilities using MEG. *PLOS ONE* 16, 1–17. <https://doi.org/10.1371/journal.pone.0247408>.
- 1225  
1226 Samuelsson, J.G., Peled, N., Mamashli, F., Ahveninen, J., Hämäläinen, M.S., 2020. Spatial fidelity of MEG/EEG source  
1227 estimates: A general evaluation approach. *NeuroImage* 224, 117430. <https://doi.org/10.1016/j.neuroimage.2020.117430>.
- 1228 Sarnthein, J., Petsche, H., Rappelsberger, P., Shaw, G.L., von Stein, A., 1998. Synchronization between prefrontal and  
1229 posterior association cortex during human working memory. *Proceedings of the National Academy of Sciences* 95, 7092–  
1230 7096. <https://doi.org/10.1073/pnas.95.12.7092>.
- 1231 Sarvas, J., 1987. Basic mathematical and electromagnetic concepts of the biomagnetic inverse problem. *Physics in Medicine &*  
1232 *Biology* 32, 11. <https://doi.org/10.1088/0031-9155/32/1/004>.
- 1233 Sauseng, P., Klimesch, W., Gruber, W.R., Birbaumer, N., 2008. Cross-frequency phase synchronization: A brain mechanism  
1234 of memory matching and attention. *NeuroImage* 40, 308–317. <https://doi.org/10.1016/j.neuroimage.2007.11.032>.
- 1235 Sauseng, P., Klimesch, W., Schabus, M., Doppelmayr, M., 2005. Fronto-parietal EEG coherence in theta and upper alpha reflect  
1236 central executive functions of working memory. *International Journal of Psychophysiology* 57, 97–103. <https://doi.org/10.1016/j.ijpsycho.2005.03.018>.
- 1237  
1238 Saxena, K.M.L., Alam, K., 1982. Estimation of the non-centrality parameter of a chi squared distribution. *The Annals of*  
1239 *Statistics* 10, 1012–1016. URL: <https://www.jstor.org/stable/2240925>.
- 1240 Schoffelen, J.M., Gross, J., 2009. Source connectivity analysis with MEG and EEG. *Human Brain Mapping* 30, 1857–1865.  
1241 <https://doi.org/10.1002/hbm.20745>.
- 1242 Sekihara, K., Attias, H., Owen, J., Nagarajan, S.S., 2011. Effectiveness of sparse Bayesian algorithm for MVAR coefficient  
1243 estimation in MEG/EEG source-space causality analysis, in: 2011 8th International Symposium on Noninvasive Functional  
1244 Source Imaging of the Brain and Heart and the 2011 8th International Conference on Bioelectromagnetism, pp. 87–92.  
1245 <https://doi.org/10.1109/NFSI.2011.5936826>.
- 1246 Sekihara, K., Owen, J., Attias, H., Nagarajan, S.S., 2010. Estimating causality measures from reconstructed source time courses  
1247 when large background activities exist, in: 17th International Conference on Biomagnetism Advances in Biomagnetism–  
1248 Biomag2010, Springer. pp. 203–206. [https://doi.org/10.1007/978-3-642-12197-5\\_45](https://doi.org/10.1007/978-3-642-12197-5_45).
- 1249 Seth, A.K., Barrett, A.B., Barnett, L., 2015. Granger causality analysis in neuroscience and neuroimaging. *Journal of*  
1250 *Neuroscience* 35, 3293–3297. <https://doi.org/10.1523/JNEUROSCI.4399-14.2015>.
- 1251 Seymour, R., Wang, H., Rippon, G., Kessler, K., 2018. Oscillatory networks of high-level mental alignment: A perspective-  
1252 taking MEG study. *NeuroImage* 177, 98–107. <https://doi.org/10.1016/j.neuroimage.2018.05.016>.
- 1253 Shafiei, G., Baillet, S., Misis, B., 2021. Mapping electromagnetic networks to haemodynamic networks in the human brain.  
1254 bioRxiv <https://doi.org/10.1101/2021.09.07.458941>.
- 1255 Sheikhattar, A., Miran, S., Liu, J., Fritz, J.B., Shamma, S.A., Kanold, P.O., Babadi, B., 2018. Extracting neuronal functional  
1256 network dynamics via adaptive Granger causality analysis. *Proceedings of the National Academy of Sciences* 115, E3869–  
1257 E3878. <https://doi.org/10.1073/pnas.1718154115>.

- 1258 Shumway, R.H., Stoffer, D.S., 1982. An approach to time series smoothing and forecasting using the EM algorithm. *Journal*  
1259 *of Time Series Analysis* 3, 253–264. <https://doi.org/10.1111/j.1467-9892.1982.tb00349.x>.
- 1260 Sohrabpour, A., Ye, S., Worrell, G.A., Zhang, W., He, B., 2016. Noninvasive electromagnetic source imaging and Granger  
1261 causality analysis: an electrophysiological connectome (eConnectome) approach. *IEEE Transactions on Biomedical Engi-*  
1262 *neering* 63, 2474–2487. <https://doi.org/10.1109/TBME.2016.2616474>.
- 1263 Soleimani, B., Das, P., 2022. NLGC: Network localized Granger causality. <https://github.com/BabadiLab/NLGC>.
- 1264 Soleimani, B., Das, P., Kulasingham, J., Simon, J.Z., Babadi, B., 2020. Granger causal inference from indirect low-dimensional  
1265 measurements with application to MEG functional connectivity analysis, in: *2020 54th Annual Conference on Information*  
1266 *Sciences and Systems (CISS)*, pp. 1–5. <https://doi.org/10.1109/CISS48834.2020.1570617418>.
- 1267 Sporns, O., 2014. Contributions and challenges for network models in cognitive neuroscience. *Nature neuroscience* 17, 652–660.  
1268 <https://doi.org/10.1038/nn.3690>.
- 1269 Tait, L., Özkan, A., Szul, M.J., Zhang, J., 2021. A systematic evaluation of source reconstruction of resting MEG of the human  
1270 brain with a new high-resolution atlas: Performance, precision, and parcellation. *Human Brain Mapping* 42, 4685–4707.  
1271 <https://doi.org/10.1002/hbm.25578>.
- 1272 Tan, W.Y., 1977. On the distribution of quadratic forms in normal random variables. *Canadian Journal of Statistics* 5, 241–250.  
1273 <https://doi.org/10.2307/3314784>.
- 1274 Taulu, S., Simola, J., 2006. Spatiotemporal signal space separation method for rejecting nearby interference in MEG measure-  
1275 ments. *Physics in Medicine and Biology* 51, 1759–1768. <https://doi.org/10.1088/0031-9155/51/7/008>.
- 1276 Voeten, C.C., 2021. buildmer: Stepwise Elimination and Term Reordering for Mixed-Effects Regression. URL: [https://CRAN.](https://CRAN.R-project.org/package=buildmer)  
1277 [R-project.org/package=buildmer](https://CRAN.R-project.org/package=buildmer).
- 1278 Vysata, O., Kukal, J., Prochazka, A., Pazdera, L., Simko, J., Valis, M., 2014. Age-related changes in EEG coherence. *Neurologia*  
1279 *i Neurochirurgia Polska* 48, 35 – 38. <https://doi.org/10.1016/j.pjnns.2013.09.001>.
- 1280 Wald, A., 1943. Tests of statistical hypotheses concerning several parameters when the number of observations is large.  
1281 *Transactions of the American Mathematical Society* 54, 426–482.
- 1282 Weiss, S., Rappelsberger, P., 2000. Long-range EEG synchronization during word encoding correlates with successful memory  
1283 performance. *Cognitive Brain Research* 9, 299–312. [https://doi.org/10.1016/S0926-6410\(00\)00011-2](https://doi.org/10.1016/S0926-6410(00)00011-2).
- 1284 Wilks, S.S., 1938. The large-sample distribution of the likelihood ratio for testing composite hypotheses. *The Annals of*  
1285 *Mathematical Statistics* 9, 60–62. URL: <https://www.jstor.org/stable/2957648>.
- 1286 Wipf, D.P., Owen, J.P., Attias, H.T., Sekihara, K., Nagarajan, S.S., 2010. Robust bayesian estimation of the location,  
1287 orientation, and time course of multiple correlated neural sources using MEG. *NeuroImage* 49, 641–655. [https://doi.org/10.](https://doi.org/10.1016/j.neuroimage.2009.06.083)  
1288 [1016/j.neuroimage.2009.06.083](https://doi.org/10.1016/j.neuroimage.2009.06.083).
- 1289 Youden, W.J., 1950. Index for rating diagnostic tests. *Cancer* 3, 32–35. [https://doi.org/10.1002/1097-0142\(1950\)3:1<32::](https://doi.org/10.1002/1097-0142(1950)3:1<32::AID-CNCR2820030106>3.0.CO;2-3)  
1290 [AID-CNCR2820030106>3.0.CO;2-3](https://doi.org/10.1002/1097-0142(1950)3:1<32::AID-CNCR2820030106>3.0.CO;2-3).
- 1291 Yue, Q., Zhang, L., Xu, G., Shu, H., Li, P., 2013. Task-modulated activation and functional connectivity of the temporal and  
1292 frontal areas during speech comprehension. *Neuroscience* 237, 87–95. [https://doi.org/10.1016/j.neuroscience.2012.12.](https://doi.org/10.1016/j.neuroscience.2012.12.067)  
1293 [067](https://doi.org/10.1016/j.neuroscience.2012.12.067).
- 1294 Zou, H., Hastie, T., Tibshirani, R., 2007. On the degrees of freedom of the lasso. *The Annals of Statistics* 35, 2173–2192.  
1295 <https://doi.org/10.1214/009053607000000127>.

## 1296 Appendix A. Parameter Estimation

1297 This appendix provides the details and derivations of the EM algorithm used in NLGC as well as the  
 1298 VAR fitting used by the two-stage approaches. The EM algorithm is derived in Appendix A.1. In Appendix  
 1299 A.2, we present the filtering and smoothing procedures to obtain the conditional distribution  $p(\mathbf{x}_{1:T}|\mathbf{y}_{1:T}; \boldsymbol{\theta})$ ,  
 1300 followed by the VAR fitting procedure used in two-stage approaches that are derived in Appendix A.3.

### 1301 Appendix A.1. EM Algorithm

1302 In this section, we derive the E- and M-steps used in the network parameter estimation module of NLGC.

#### 1303 E-step

1304 We start from the joint distribution of  $\{\mathbf{x}_t\}_{t=1}^T$  and  $\{\mathbf{y}_t\}_{t=1}^T$ . From the Bayes' rule we have

$$1305 \log p(\mathbf{y}_{1:T}, \mathbf{x}_{1:T}; \boldsymbol{\theta}) = \log p(\mathbf{y}_{1:T}|\mathbf{x}_{1:T}; \boldsymbol{\theta}) + \log p(\mathbf{x}_{1:T}; \boldsymbol{\theta}). \quad (\text{A.1})$$

1306 The conditional distribution can be directly written from observation model in Eq. (1) as

$$1307 \log p(\mathbf{y}_{1:T}|\mathbf{x}_{1:T}; \boldsymbol{\theta}) = \sum_{t=1}^T \log p(\mathbf{y}_t|\mathbf{x}_t; \boldsymbol{\theta}) = -\frac{T}{2} \log(2\pi|\mathbf{R}|) - \frac{1}{2} \sum_{t=1}^T \|\mathbf{y}_t - \mathbf{C}\mathbf{x}_t\|_{\mathbf{R}^{-1}}, \quad (\text{A.2})$$

1308 where  $\|\mathbf{a}\|_{\mathbf{B}} := \mathbf{a}^\top \mathbf{B} \mathbf{a}$  is utilized for notational convenience.

1309 Using the fact that  $\mathbf{Q} = \text{diag}(\sigma_1^2, \dots, \sigma_M^2)$  along with the source dynamic model in Eq. (2), one can write  
 1310 down

$$1311 \log p(\mathbf{x}_{1:T}; \boldsymbol{\theta}) = -\frac{T}{2} \log(2\pi \prod_{i=1}^M \sigma_i^2) - \sum_{i=1}^M \frac{1}{2\sigma_i^2} \|\underline{\mathbf{x}}_i - \mathcal{X} \mathbf{a}_i\|_2^2, \quad (\text{A.3})$$

1312 where  $\underline{\mathbf{x}}_i := [x_{i,K+1:T}]^\top$ ,  $\mathbf{a}_i = [[\mathbf{A}_k]_{i,j}, \forall k, j]^\top$ , and

$$1313 \mathcal{X} := \left[ [x_{1,K:T-1}]^\top, \dots, [x_{1,1:T-K}]^\top, \dots, [x_{M,1:T-K}]^\top \right].$$

1314 Now, substituting Eqs. (A.2) and (A.3) into Eq. (A.1) along with taking the expectation yields

$$1315 \begin{aligned} Q(\boldsymbol{\theta}|\hat{\boldsymbol{\theta}}^{(l)}) &= \mathbb{E}[\log p(\mathbf{x}_{1:T}, \mathbf{y}_{1:T}; \boldsymbol{\theta})|\mathbf{y}_{1:T}, \hat{\boldsymbol{\theta}}^{(l)}] \\ &= \mathcal{K}(\hat{\boldsymbol{\theta}}^{(l)}) - \frac{T}{2} \sum_{i=1}^M \log(\sigma_i^2) - \sum_{i=1}^M \frac{1}{2\sigma_i^2} \left( \mathbf{a}_i^\top \mathbf{G}^{(l)} \mathbf{a}_i - 2\mathbf{h}_i^{(l)\top} \mathbf{a}_i + f_i^{(l)} \right), \end{aligned}$$

1316 where  $\mathcal{K}(\hat{\boldsymbol{\theta}}^{(l)})$  represents the constant terms with respect to  $\boldsymbol{\theta}$

$$1317 \mathcal{K}(\hat{\boldsymbol{\theta}}^{(l)}) = -\frac{T}{2} \log(2\pi|\mathbf{R}|) - \frac{T}{2} \log(2\pi) - \frac{1}{2} \sum_{t=1}^T \mathbb{E}[\|\mathbf{y}_t - \mathbf{C}\mathbf{x}_t\|_{\mathbf{R}^{-1}}|\mathbf{y}_{1:T}; \hat{\boldsymbol{\theta}}^{(l)}],$$

1318 and

$$1319 \mathbf{G}^{(l)} = \mathbb{E}[\mathcal{X}^\top \mathcal{X}|\mathbf{y}_{1:T}; \hat{\boldsymbol{\theta}}^{(l)}], \quad \mathbf{h}_i^{(l)} = \mathbb{E}[\mathcal{X}^\top \underline{\mathbf{x}}_i|\mathbf{y}_{1:T}; \hat{\boldsymbol{\theta}}^{(l)}], \quad f_i^{(l)} = \mathbb{E}[\underline{\mathbf{x}}_i^\top \underline{\mathbf{x}}_i|\mathbf{y}_{1:T}; \hat{\boldsymbol{\theta}}^{(l)}] \quad (\forall i).$$



1320 It is noteworthy to mention that the variables  $\mathbf{G}^{(l)}$ ,  $\mathbf{h}_i^{(l)}$ , and  $\mathbf{f}_i^{(l)}$  can be written as a function of first- and  
 1321 second-order moments of the conditional density  $p(\mathbf{x}_{1:T}|\mathbf{y}_{1:T};\hat{\boldsymbol{\theta}}^{(l)})$ . It can be shown that the conditional  
 1322 density  $p(\mathbf{x}_{1:T}|\mathbf{y}_{1:T};\hat{\boldsymbol{\theta}}^{(l)})$  is Gaussian due to underlying Gaussian assumptions on  $\mathbf{w}_t$  and  $\mathbf{n}_t$ . Thus, the  
 1323 mean and covariance matrices can be efficiently computed via the Fixed Interval Smoothing (FIS) algorithm  
 1324 (Anderson and Moore, 2005). The details are presented in the next subsection.

1325 *M-step*

1326 To avoid ill-posedness caused by the low-dimensional MEG measurements, we leverage the sparse con-  
 1327 nectivity feature of cortical sources and add a regularization term in the M-step as follows:

$$1328 \quad \hat{\boldsymbol{\theta}}^{(l+1)} = \underset{\boldsymbol{\theta}}{\operatorname{argmax}} \left\{ Q(\boldsymbol{\theta}|\hat{\boldsymbol{\theta}}^{(l)}) + R_p(\boldsymbol{\lambda}, \boldsymbol{\theta}) \right\}, \quad (\text{A.4})$$

1329 where  $R_p(\boldsymbol{\lambda}, \boldsymbol{\theta}) := -2 \sum_{i=1}^M \lambda_i \|\mathbf{a}_i\|_p^p$  is the regularization function and  $\boldsymbol{\lambda} = [\lambda_1, \dots, \lambda_M]^\top \in \mathbb{R}^M$  is the  
 1330 regularization coefficients vector. The closed-form solution for  $p = 2$  can be obtained as

$$1331 \quad \hat{\mathbf{a}}_i^{(l+1)} = \left( \mathbf{G}^{(l)} + \lambda_i \mathbf{I} \right)^{-1} \mathbf{h}_i^{(l)}, \quad \forall i \quad (\text{A.5})$$

$$1332 \quad \hat{\sigma}_i^{2(l+1)} = \frac{1}{T} \left( \hat{\mathbf{a}}_i^{(l+1)\top} \mathbf{G}^{(l)} \hat{\mathbf{a}}_i^{(l+1)} - 2 \mathbf{h}_i^{(l)\top} \hat{\mathbf{a}}_i^{(l+1)} + f_i^{(l)} \right), \quad \forall i. \quad (\text{A.6})$$

1334 To enforce sparsity, we use  $p = 1$ . However, the closed-form solution does not exist. We use the well-known  
 1335 *Fast Adaptive Shrinkage/Thresholding Algorithm* (FASTA) to find the  $\ell_1$ -norm regularized solution to Eq.  
 1336 (A.4) (Goldstein et al., 2014).

1337 The EM procedure for the full model is summarized in Algorithm 2. It is noteworthy that in order  
 1338 to find the VAR model parameters for the full and reduced models, one requires to run the algorithm for  
 1339 a total of  $M(M-1) + 1$  times, i.e., 1 full model where we consider all interactions between the sources  
 1340 and  $M(M-1)$  reduced models corresponding to all possible links in the set  $\mathcal{I}$ . Thus, it is crucial to have  
 1341 computationally efficient solutions to carry out the computations in the E-step. Before presenting the FIS  
 1342 procedure used for this purpose, some remarks regarding the initialization of the EM algorithm, estimating  
 1343 the reduced models, and choosing the regularization parameters  $\boldsymbol{\lambda}$  are in order:

1344 **Remark 1. (Initialization)** Due to the biconvex nature of the problem in Eq. (A.4), the problem may  
 1345 have several saddle points. As a result, choosing a proper initial point for the EM algorithm is crucial and  
 1346 helps the algorithm to converge faster as well. We first obtain the minimum norm source estimates as follows

$$1347 \quad \hat{\mathbf{X}} = (\mathbf{C}^\top \mathbf{C})^{-1} \mathbf{C}^\top \mathbf{Y},$$

1348 where  $\mathbf{Y} = [\mathbf{y}_1^\top, \dots, \mathbf{y}_T^\top]^\top$  is the MEG measurement matrix and  $\hat{\mathbf{X}} = [\hat{\mathbf{x}}_1^\top, \dots, \hat{\mathbf{x}}_T^\top]^\top$  is the source estimates  
 1349 matrix. Given the source estimates, we initialize all coefficients  $\{\mathbf{A}\}_{k=1}^K$  with zero and variances matching  
 1350 the average power of each source, i.e.,  $\hat{\mathbf{a}}_i^{(0)} = \mathbf{0}$ ,  $\hat{\sigma}_i^{2(0)} = \frac{1}{T} \sum_{t=1}^T \hat{x}_{i,t}^2$ ,  $\forall i$ . In this way, the algorithm is  
 1351 initialized with an unbiased solution (Gorodnitsky et al., 1995).

1352 **Remark 2. (Reduced Models)** Algorithm 2 represents the full model parameter estimation. With some  
 1353 minor modification, one can find the reduced model estimation in a similar way. Let us assume we want to

---

**Algorithm 2** EM-based Parameter Estimation

---

Input: MEG measurements  $\{\mathbf{y}_t\}_{t=1}^T$ , lead field matrix  $\mathbf{C}$ , measurement noise covariance matrix  $\mathbf{R}$ , VAR model order  $K$ , regularization coefficients  $\boldsymbol{\lambda}$ , convergence tolerance  $\text{tol}$ , maximum number of iterations  $L$ .

1: Set  $l = 0$  and initialize  $\hat{\boldsymbol{\theta}}^{(l)}$  based on the minimum norm solution.

2: **repeat**

3:    Compute the conditional density  $p(\mathbf{x}_{1:T}|\mathbf{y}_{1:T};\hat{\boldsymbol{\theta}}^{(l)})$  via FIS.

4:    Calculate the surrogate function  $Q(\boldsymbol{\theta}|\hat{\boldsymbol{\theta}}^{(l)})$  in Eq. (A.4). ▷ E-step

5:    Solve  $\hat{\boldsymbol{\theta}}^{(l+1)} = \underset{\boldsymbol{\theta}}{\text{argmax}} \left\{ Q(\boldsymbol{\theta}|\hat{\boldsymbol{\theta}}^{(l)}) + R_1(\boldsymbol{\lambda}, \boldsymbol{\theta}) \right\}$  via FASTA. ▷ M-step

6:    Set  $l \leftarrow l + 1$ .

7: **until**  $\frac{\ell(\hat{\boldsymbol{\theta}}^{(l)}) - \ell(\hat{\boldsymbol{\theta}}^{(l-1)})}{\ell(\hat{\boldsymbol{\theta}}^{(l)})} < \text{tol}$  or  $l = L$ .

Output:  $\hat{\boldsymbol{\theta}}$ .

---

1354 estimate the reduced model parameters corresponding to the link  $(j \mapsto i) \in \mathcal{I}$ . We can use Algorithm 2 by  
 1355 enforcing  $\mathbf{a}_{i,j,k} = 0, \forall k$  at the M-step in each iteration. The output of the Algorithm 2 in this case is the  
 1356 estimated parameters for the reduced model corresponding to the link  $(j \mapsto i)$ .

1357 **Remark 3. (Regularization Parameters)** To obtain the regularization parameters  $\boldsymbol{\lambda}$ , we utilize the  
 1358 standard  $K$ -fold cross-validation. To save the computational complexity and to speed up the tuning process,  
 1359 we assume  $\boldsymbol{\lambda} = \lambda \mathbf{1}$  where  $\mathbf{1}$  is the all-one vector. As for the cross-validation metric, we use the estimation  
 1360 stability criterion presented in (Lim and Yu, 2016). Given a set of candidates for  $\lambda$ , this criterion constructs  
 1361 estimated versions of the MEG measurements based on the underlying parameters of the VAR model and  
 1362 returns the model with the lowest variance across the folds. In this way, the chosen  $\lambda$  gives a stable solution  
 1363 across the folds. Moreover, once the optimal regularization parameter  $\lambda$  is chosen for the full model, we  
 1364 use the same regularization parameter for all the subsequent reduced models (Das and Babadi, 2021). This  
 1365 way, the cross-validation only needs to be carried out for the full model.

1366 *Appendix A.2. Fixed Interval Smoothing*

1367 As mentioned earlier, under Gaussian assumptions on  $\mathbf{n}_t$  and  $\mathbf{w}_t$ , the conditional density of  $p(\mathbf{x}_{1:T}|\mathbf{y}_{1:T}; \boldsymbol{\theta})$   
 1368 is also Gaussian (Anderson and Moore, 2005). As a result, we just need to find the conditional mean and  
 1369 covariance matrix of the random vector  $\mathbf{x}_{1:T}$  given  $\mathbf{y}_{1:T}$  and  $\boldsymbol{\theta}$ .

1370 Using the Kalman filter, we can compute the filtered densities  $p(\mathbf{x}_t|\mathbf{y}_{1:t}; \boldsymbol{\theta})$  for  $t = 1, 2, \dots, T$ . Using  
 1371 the filtered densities, the FIS procedure allows us to also find  $p(\mathbf{x}_t|\mathbf{y}_{1:T}; \boldsymbol{\theta})$  for  $t = 1, 2, \dots, T$ . To this  
 1372 end, we first perform state augmentation to transform VAR( $K$ ) models to equivalent VAR(1) models. The  
 1373 augmented state vector is defined as  $\tilde{\mathbf{x}}_t = [\mathbf{x}_t^\top, \mathbf{x}_{t-1}^\top, \dots, \mathbf{x}_{t-K+1}^\top]^\top \in \mathbb{R}^{KM}$ . The VAR( $K$ ) model in Eq. (2)  
 1374 can thus be rewritten as a VAR(1) model given by:

$$1375 \quad \tilde{\mathbf{x}}_t = \tilde{\mathbf{A}}\tilde{\mathbf{x}}_{t-1} + \tilde{\mathbf{w}}_t, \quad t = 1, 2, \dots, T, \quad (\text{A.7})$$

1376 where

$$1377 \quad \tilde{\mathbf{A}} := \begin{bmatrix} \mathbf{A}_1 & \mathbf{A}_2 & \dots & \mathbf{A}_{K-1} & \mathbf{A}_K \\ \mathbf{I}_M & \mathbf{0} & \dots & \mathbf{0} & \mathbf{0} \\ \mathbf{0} & \mathbf{I}_M & \dots & \mathbf{0} & \mathbf{0} \\ \vdots & \vdots & \ddots & \vdots & \vdots \\ \mathbf{0} & \mathbf{0} & \dots & \mathbf{I}_M & \mathbf{0} \end{bmatrix} \in \mathbb{R}^{KM \times KM},$$

1378 and  $\tilde{\mathbf{w}}_t \in \mathbb{R}^{KM}$  is the augmented state noise vector with covariance matrix  $\tilde{\mathbf{Q}} := \text{diag}(\sigma_1^2, \dots, \sigma_M^2, 0, 0, \dots, 0)$ .

1379 Similarly, we can modify the measurement model in Eq. (1) as follows

$$1380 \quad \mathbf{y}_t = \tilde{\mathbf{C}}\tilde{\mathbf{x}}_t + \mathbf{n}_t, \quad t = 1, 2, \dots, T, \quad (\text{A.8})$$

1381 with  $\tilde{\mathbf{C}} = [\mathbf{C}, \mathbf{0}, \dots, \mathbf{0}] \in \mathbb{R}^{N \times KM}$ .

1382 Let us define the conditional mean, covariance, and cross-variance of the sources as  $\tilde{\mathbf{x}}_{t_1|t_2} := \mathbb{E}[\tilde{\mathbf{x}}_{t_1} | \mathbf{y}_{1:t_2}]$ ,  
 1383  $\tilde{\Sigma}_{t_1|t_2} := \text{Cov}[\tilde{\mathbf{x}}_{t_1} | \mathbf{y}_{1:t_2}]$ , and  $\tilde{\mathbf{P}}_{t_1, t_2|T} := \text{Cov}[\tilde{\mathbf{x}}_{t_1}, \tilde{\mathbf{x}}_{t_2} | \mathbf{y}_{1:T}]$ , respectively, for two given time-points  $1 \leq t_1, t_2 \leq$   
 1384  $T$ . Assuming that matrices  $\tilde{\mathbf{A}}, \tilde{\mathbf{B}}, \tilde{\mathbf{C}}, \tilde{\mathbf{Q}}, \mathbf{R}$ , and  $\{\mathbf{y}_t\}_{t=1}^T$  are given, we can utilize the *Kalman filter* to obtain  
 1385  $p(\tilde{\mathbf{x}}_t | \mathbf{y}_{1:t}) \sim \mathcal{N}(\tilde{\mathbf{x}}_{t|t}, \tilde{\Sigma}_{t|t})$ ,  $t = 1, \dots, T$ . Next, we use FIS to also find  $p(\tilde{\mathbf{x}}_t | \mathbf{y}_{1:T}) \sim \mathcal{N}(\tilde{\mathbf{x}}_{t|T}, \tilde{\Sigma}_{t|T})$ ,  $t =$   
 1386  $1, \dots, T$ .

1387 According to (Jong and Mackinnon, 1988), for the the conditional cross-covariance, we have the following  
 1388 recursive relationship:

$$1389 \quad \tilde{\mathbf{P}}_{t_1, t_2|T} = \begin{cases} \tilde{\mathbf{P}}_{t_2, t_1|T}^\top, & t_1 > t_2, \\ \tilde{\Sigma}_{t_1|T}, & t_1 = t_2, \\ \mathbf{S}_{t_1} \tilde{\mathbf{P}}_{t_1+1, t_2|T}, & t_1 < t_2, \end{cases}$$

1390 where  $\mathbf{S}_{t_1} = \tilde{\Sigma}_{t_1|t_1} \tilde{\mathbf{A}}^\top \tilde{\Sigma}_{t_1+1|t_1}^{-1}$ .

1391 Finally, to extract the first- and second-order moments of the sources from the augmented model, we  
 1392 define  $\bar{\mathbf{x}}_{t|T} := \mathbb{E}[\mathbf{x}_t | \mathbf{y}_{1:T}]$  and  $\mathbf{P}_{t_1, t_2|T} := \text{Cov}[\mathbf{x}_{t_1}, \mathbf{x}_{t_2} | \mathbf{y}_{1:T}]$ . From the definition of the augmented model, we  
 1393 have

$$1394 \quad \bar{\mathbf{x}}_{t|T} = [\tilde{\mathbf{x}}_{t|T}]_{1:M}, \quad t = 1, \dots, T,$$

$$\mathbf{P}_{t_1, t_2|T} = [\tilde{\mathbf{P}}_{t_1, t_2|T}]_{1:M, 1:t_2}, \quad t_1, t_2 = 1, \dots, T.$$

1395 Algorithm 3 summarizes the overall procedure for finding the smoothed means and covariance matrices. A  
 1396 costly computational step in Algorithm 3 is the inversion of  $\tilde{\Sigma}_{t+1|t} \in \mathbb{R}^{KM \times KM}$  that needs to be performed  
 1397 in each iteration. In order to mitigate this source of computational complexity, we use the steady-state  
 1398 filtering approach of (Pirondini et al., 2018). Let us define the steady-state covariance matrices  $\tilde{\Sigma}^{(+)}$  and

---

**Algorithm 3** Fixed Interval Smoothing

---

Input: MEG measurements  $\{\mathbf{y}_t\}_{t=1}^T$ , lead field matrix  $\mathbf{C}$ , measurement noise covariance matrix  $\mathbf{R}$ , VAR models parameters  $\{\mathbf{A}_k\}_{k=1}^K$  and  $\mathbf{Q}$ .

1: Construct augmented matrices  $\tilde{\mathbf{A}}$ ,  $\tilde{\mathbf{Q}}$ , and  $\tilde{\mathbf{C}}$ .

2: Forward filter for  $t = 0, 1, \dots, T - 1$ :

$$\begin{aligned}\tilde{\mathbf{x}}_{t+1|t} &= \tilde{\mathbf{A}}\tilde{\mathbf{x}}_{t|t}, \\ \tilde{\Sigma}_{t+1|t} &= \tilde{\mathbf{A}}\tilde{\Sigma}_{t|t}\tilde{\mathbf{A}}^\top + \tilde{\mathbf{Q}}, \\ \mathbf{K}_{t+1} &= \tilde{\Sigma}_{t+1|t}\tilde{\mathbf{C}}^\top(\tilde{\mathbf{C}}\tilde{\Sigma}_{t+1|t}\tilde{\mathbf{C}}^\top + \mathbf{R})^{-1}, \\ \tilde{\mathbf{x}}_{t+1|t+1} &= \tilde{\mathbf{x}}_{t+1|t} + \mathbf{K}_{t+1}(\mathbf{y}_{t+1} - \tilde{\mathbf{C}}\tilde{\mathbf{x}}_{t+1|t}), \\ \tilde{\Sigma}_{t+1|t+1} &= \tilde{\Sigma}_{t+1|t} - \mathbf{K}_{t+1}(\tilde{\mathbf{C}}\tilde{\Sigma}_{t+1|t}\tilde{\mathbf{C}}^\top + \mathbf{R})\mathbf{K}_{t+1}^\top.\end{aligned}$$

3: Backward smoothing for  $t = T - 1, T - 2, \dots, 1, 0$ :

$$\begin{aligned}\tilde{\mathbf{x}}_{t+1|t} &= \tilde{\mathbf{A}}\tilde{\mathbf{x}}_{t|t}, \\ \tilde{\Sigma}_{t+1|t} &= \tilde{\mathbf{A}}\tilde{\Sigma}_{t|t}\tilde{\mathbf{A}}^\top + \tilde{\mathbf{Q}}, \\ \mathbf{S}_t &= \tilde{\Sigma}_{t|t}\tilde{\mathbf{A}}^\top\tilde{\Sigma}_{t+1|t}^{-1}, \\ \tilde{\mathbf{x}}_{t|T} &= \tilde{\mathbf{x}}_{t|t} + \mathbf{S}_t(\tilde{\mathbf{x}}_{t+1|T} - \tilde{\mathbf{x}}_{t+1|t}), \\ \tilde{\Sigma}_{t|T} &= \tilde{\Sigma}_{t|t} + \mathbf{S}_t(\tilde{\Sigma}_{t+1|T} - \tilde{\Sigma}_{t+1|t})\mathbf{S}_t^\top.\end{aligned}$$

4: Covariance smoothing for  $t_1, t_2 = T, T - 1, \dots, 1, 0$ :

$$\tilde{\mathbf{P}}_{t_1, t_2|T} = \begin{cases} \tilde{\mathbf{P}}_{t_2, t_1|T}^\top, & t_1 > t_2, \\ \tilde{\Sigma}_{t_1|T}, & t_1 = t_2, \\ \mathbf{S}_{t_1}\tilde{\mathbf{P}}_{t_1+1, t_2|T}, & t_1 < t_2. \end{cases}$$

5: Extract the first- and second-order moments of source activities from the augmented model:

$$\begin{aligned}\bar{\mathbf{x}}_{t|T} &= [\tilde{\mathbf{x}}_{t|T}]_{1:M}, \quad t = K + 1, \dots, T, \\ \mathbf{P}_{t_1, t_2|T} &= [\tilde{\mathbf{P}}_{t_1, t_2|T}]_{1:M, 1:M}, \quad t_1, t_2 = K + 1, \dots, T.\end{aligned}$$

Output: Smoothed means and covariances  $\bar{\mathbf{x}}_{t_1|T}, \mathbf{P}_{t_1, t_2|T}$ ,  $t_1, t_2 = 1, 2, \dots, T$ .

---

1399  $\Sigma^{(-)}$  as follows

$$\begin{aligned}\Sigma^{(+)} &:= \lim_{t \rightarrow \infty} \Sigma_{t|t}, \\ \Sigma^{(-)} &:= \lim_{t \rightarrow \infty} \Sigma_{t+1|t}.\end{aligned}$$

1401 Replacing these steady-state values into the forward filter yields

$$\begin{aligned}\Sigma^{(-)} &= \tilde{\mathbf{A}}\Sigma^{(+)}\tilde{\mathbf{A}}^\top + \tilde{\mathbf{Q}}, \\ \Sigma^{(+)} &= \Sigma^{(-)} - \Sigma^{(-)}\tilde{\mathbf{C}}^\top(\tilde{\mathbf{C}}\Sigma^{(-)}\tilde{\mathbf{C}}^\top + \mathbf{R})^{-1}\tilde{\mathbf{C}}\Sigma^{(-)},\end{aligned}\tag{A.9}$$

1403 which is known as the discrete-time algebraic Riccati (DARE) equation with respect to  $\Sigma^{(+)}$ . The DARE  
1404 equation can be solved efficiently using the MacFarlane-Potter-Fath eigen-structure method (Malik et al.,  
1405 2011). Solving the Riccati equation gives the steady-state covariance matrices and from there, we can

1406 compute the Kalman gain ( $\mathbf{K}_t$ ) and smoothing gain ( $\mathbf{S}_t$ ) independent of  $t$ :

$$\begin{aligned} \mathbf{K}_{t+1} &\approx \mathbf{K} := \boldsymbol{\Sigma}^{(-)} \tilde{\mathbf{C}}^\top (\tilde{\mathbf{C}} \boldsymbol{\Sigma}^{(-)} \tilde{\mathbf{C}}^\top + \mathbf{R})^{-1}, \quad \forall t, \\ \mathbf{S}_{t+1} &\approx \mathbf{S} := \boldsymbol{\Sigma}^{(+)} \tilde{\mathbf{A}}^\top (\boldsymbol{\Sigma}^{(-)})^{-1}, \quad \forall t. \end{aligned}$$

1408 As a result, only two matrix inversions are required at the beginning of the FIS, thereby providing significant  
1409 computational savings.

### 1410 *Appendix A.3. VAR Model Fitting in the Two-Stage Methods*

1411 In the two-stage approaches, the source estimates are first computed using a source localization procedure,  
1412 followed by VAR model fitting. Let us denote the source estimates by  $\{\hat{\mathbf{x}}_t\}_{t=1}^T$ . The VAR( $K$ ) model fitting  
1413 can be performed in various ways, among which maximum likelihood estimation is a popular method (Haykin,  
1414 2013). To this end, one needs to compute  $\hat{\boldsymbol{\theta}}_{\text{MLE}} := \underset{\boldsymbol{\theta}}{\operatorname{argmax}} \log p(\hat{\mathbf{x}}_{1:T}; \boldsymbol{\theta})$ , where

$$\log p(\hat{\mathbf{x}}_{1:T}; \boldsymbol{\theta}) = -\frac{T}{2} \log(2\pi \prod_{i=1}^M \sigma_i^2) - \sum_{i=1}^M \frac{1}{2\sigma_i^2} \|\hat{\mathbf{x}}_i - \hat{\mathcal{X}} \mathbf{a}_i\|_2^2,$$

1416 with  $\hat{\mathbf{x}}_i := [\hat{x}_{i,K+1:T}]^\top$ , and  $\hat{\mathcal{X}} := \left[ [\hat{x}_{1,K:T-1}]^\top, \dots, [\hat{x}_{1,1:T-K}]^\top, \dots, [\hat{x}_{M,1:T-K}]^\top \right]$ . Setting the derivative of  
1417 the log-likelihood with respect to the parameters to zero gives the following closed-form solution

$$\hat{\mathbf{a}}_i = (\hat{\mathcal{X}}^\top \hat{\mathcal{X}})^{-1} \hat{\mathcal{X}}^\top \hat{\mathbf{x}}_i, \quad \hat{\sigma}_i^2 = \frac{1}{T} \|\hat{\mathbf{x}}_i - \hat{\mathcal{X}} \hat{\mathbf{a}}_i\|_2^2, \quad \forall i.$$

1419 Similar to NLGC, we can enforce sparsity by considering an  $\ell_1$ -norm regularized maximum likelihood prob-  
1420 lem. To this end, we need to find  $\hat{\boldsymbol{\theta}}_{\text{SMLE}} := \underset{\boldsymbol{\theta}}{\operatorname{argmax}} \log p(\hat{\mathbf{x}}_{1:T}; \boldsymbol{\theta}) + R(\boldsymbol{\lambda}, \boldsymbol{\theta})$ , where  $R(\boldsymbol{\lambda}, \boldsymbol{\theta}) := -\sum_{i=1}^M \lambda_i \|\mathbf{a}_i\|_1$   
1421 is the  $\ell_1$ -norm penalty and  $\boldsymbol{\lambda} := [\lambda_1, \dots, \lambda_M]^\top \in \mathbb{R}^M$  is the regularization vector. As mentioned in Ap-  
1422 pendix A.1, this problem does not have a closed-form solution. However, we can use iterative methods  
1423 such as FASTA (Goldstein et al., 2014) or *Iteratively Re-weighted Least Squares* (IRLS) (Ba et al., 2014)  
1424 to obtain the  $\ell_1$ -norm regularized estimates. The regularization parameters  $\boldsymbol{\lambda}$  can be tuned using standard  
1425 cross-validation techniques, as mentioned in Appendix A.1.

## 1426 **Appendix B. Proof of Theorem 1**

1427 The proof of Theorem 1 follows that of the main theorem in (Sheikhattar et al., 2018). First, we define  
1428 the following notations for a given log-likelihood function  $\ell(\boldsymbol{\theta})$  with parameter  $\boldsymbol{\theta}$ :

$$\begin{aligned} \dot{\ell}(\boldsymbol{\theta}) &:= \nabla_{\boldsymbol{\theta}} \ell(\boldsymbol{\theta}), \\ \ddot{\ell}(\boldsymbol{\theta}) &:= \nabla_{\boldsymbol{\theta}}^2 \ell(\boldsymbol{\theta}), \\ \mathcal{I}(\boldsymbol{\theta}) &:= \mathbb{E} \left[ \dot{\ell}(\boldsymbol{\theta}) \dot{\ell}(\boldsymbol{\theta})^\top \right], \end{aligned}$$

1430 where  $\dot{\ell}(\cdot)$  denotes the gradient vector of the likelihood with respect to  $\boldsymbol{\theta}$ , also referred to as the score  
 1431 statistics,  $\ddot{\ell}(\cdot)$  denotes the Hessian matrix of the log-likelihood, and  $\mathcal{I}(\cdot)$  is the Fisher information matrix.  
 1432 We define the de-biased deviance difference between the true value of  $\boldsymbol{\theta}$  and its estimate  $\widehat{\boldsymbol{\theta}}$  as (Sheikhhattar  
 1433 et al., 2018):

$$1434 \quad \mathcal{D}(\widehat{\boldsymbol{\theta}}; \boldsymbol{\theta}) := 2(\ell(\widehat{\boldsymbol{\theta}}) - \ell(\boldsymbol{\theta})) - \dot{\ell}(\widehat{\boldsymbol{\theta}})^\top \ddot{\ell}(\boldsymbol{\theta})^{-1} \dot{\ell}(\widehat{\boldsymbol{\theta}}). \quad (\text{B.1})$$

1435 Starting from the definition of the log-likelihood function, we can decompose  $\ell(\boldsymbol{\theta})$  as

$$1436 \quad \ell(\boldsymbol{\theta}) = \sum_{t=1}^T \ell_t(\boldsymbol{\theta}). \quad (\text{B.2})$$

1437 where  $\ell_t(\boldsymbol{\theta}) = \log p(\mathbf{y}_t | \mathbf{y}_{1:t-1}; \boldsymbol{\theta})$  for  $t = 2, \dots, T$  with the convention  $\ell_1(\boldsymbol{\theta}) = \log p(\mathbf{y}_1; \boldsymbol{\theta})$ . Using the  
 1438 second-order Taylor expansion of  $\ell(\boldsymbol{\theta})$  around  $\widehat{\boldsymbol{\theta}}$  along with the intermediate value theorem, we have

$$1439 \quad \ell(\boldsymbol{\theta}) = \ell(\widehat{\boldsymbol{\theta}}) + (\boldsymbol{\theta} - \widehat{\boldsymbol{\theta}})^\top \dot{\ell}(\widehat{\boldsymbol{\theta}}) + \frac{1}{2}(\boldsymbol{\theta} - \widehat{\boldsymbol{\theta}})^\top \ddot{\ell}(\tilde{\boldsymbol{\theta}})(\boldsymbol{\theta} - \widehat{\boldsymbol{\theta}}), \quad (\text{B.3})$$

1440 where  $\tilde{\boldsymbol{\theta}} := \beta \boldsymbol{\theta} + (1 - \beta)\widehat{\boldsymbol{\theta}}$  for some  $\beta \in (0, 1)$  such that  $\|\tilde{\boldsymbol{\theta}} - \boldsymbol{\theta}\|_2 < \|\widehat{\boldsymbol{\theta}} - \boldsymbol{\theta}\|_2$ . Substituting  $\ell(\boldsymbol{\theta})$  from Eq.  
 1441 (B.3) into Eq. (B.1) gives

$$1442 \quad \mathcal{D}(\widehat{\boldsymbol{\theta}}; \boldsymbol{\theta}) = -2(\boldsymbol{\theta} - \widehat{\boldsymbol{\theta}})^\top \dot{\ell}(\widehat{\boldsymbol{\theta}}) + (\boldsymbol{\theta} - \widehat{\boldsymbol{\theta}})^\top \ddot{\ell}(\tilde{\boldsymbol{\theta}})(\boldsymbol{\theta} - \widehat{\boldsymbol{\theta}}) + \dot{\ell}(\widehat{\boldsymbol{\theta}})^\top \boldsymbol{\Theta} \dot{\ell}(\widehat{\boldsymbol{\theta}}),$$

1443 where  $\boldsymbol{\Theta} := \ddot{\ell}(\boldsymbol{\theta})^{-1}$ . Using an auxiliary vector  $\boldsymbol{\vartheta} := \widehat{\boldsymbol{\theta}} - \boldsymbol{\Theta} \dot{\ell}(\widehat{\boldsymbol{\theta}})$  and after rearrangement, the de-biased  
 1444 deviance can be rewritten as

$$1445 \quad \mathcal{D}(\widehat{\boldsymbol{\theta}}; \boldsymbol{\theta}) = -(\boldsymbol{\vartheta} - \boldsymbol{\theta})^\top \ddot{\ell}(\widehat{\boldsymbol{\theta}})(\boldsymbol{\vartheta} - \boldsymbol{\theta}) + \Delta, \quad (\text{B.4})$$

1446 with

$$1447 \quad \Delta = 2(\boldsymbol{\theta} - \widehat{\boldsymbol{\theta}})^\top (\mathbf{I} - \ddot{\ell}(\widehat{\boldsymbol{\theta}})\boldsymbol{\Theta}) \dot{\ell}(\widehat{\boldsymbol{\theta}}) + \dot{\ell}(\widehat{\boldsymbol{\theta}})^\top \boldsymbol{\Theta} (\mathbf{I} - \ddot{\ell}(\widehat{\boldsymbol{\theta}})\boldsymbol{\Theta}) \dot{\ell}(\widehat{\boldsymbol{\theta}}) + (\boldsymbol{\theta} - \widehat{\boldsymbol{\theta}})^\top (\ddot{\ell}(\tilde{\boldsymbol{\theta}}) - \ddot{\ell}(\widehat{\boldsymbol{\theta}}))(\boldsymbol{\theta} - \widehat{\boldsymbol{\theta}}). \quad (\text{B.5})$$

1448 Employing the consistency of the estimation, i.e.,  $\widehat{\boldsymbol{\theta}} \xrightarrow{P} \boldsymbol{\theta}$  and the Lipschitz property of the second-order  
 1449 derivative of the Gaussian log-likelihood function, one can show that the term  $\Delta$  asymptotically goes to zero  
 1450 as  $T \rightarrow \infty$  with a rate of  $\|\widehat{\boldsymbol{\theta}} - \boldsymbol{\theta}\|^3 = o_{\mathbb{P}}(1/T^{3/2})$  (van de Geer et al., 2014; Sheikhhattar et al., 2018).

1451 Let us now consider the link  $(j \mapsto i) \in \mathcal{I}$ . In what follows, we prove the first and second assertions of  
 1452 the theorem regarding the null and alternative hypotheses separately.

### 1453 *Null Hypothesis*

1454 The Taylor expansion of the score statistics can be expressed as

$$1455 \quad \dot{\ell}(\widehat{\boldsymbol{\theta}}) = \dot{\ell}(\boldsymbol{\theta}) + \ddot{\ell}(\tilde{\boldsymbol{\theta}})(\widehat{\boldsymbol{\theta}} - \boldsymbol{\theta}), \quad (\text{B.6})$$

1456 where  $\tilde{\boldsymbol{\theta}} = \beta \boldsymbol{\theta} + (1 - \beta)\widehat{\boldsymbol{\theta}}$  for some  $\beta \in (0, 1)$ . Combining the Taylor expansion in Eq. (B.6) along with the  
 1457 definition  $\boldsymbol{\vartheta} = \widehat{\boldsymbol{\theta}} - \boldsymbol{\Theta} \dot{\ell}(\widehat{\boldsymbol{\theta}})$ , we have

$$1458 \quad \boldsymbol{\vartheta} - \boldsymbol{\theta} = -\boldsymbol{\Theta} \dot{\ell}(\boldsymbol{\theta}) + \Delta, \quad (\text{B.7})$$

1459 with  $\Delta := (\mathbf{I} - \Theta \ddot{\ell}(\tilde{\theta}))(\hat{\theta} - \theta)$ . Following the same argument for  $\Delta$  in Eq. (B.5), one can show that  
 1460  $\Delta = o_{\mathbb{P}}(1/T)$  is asymptotically negligible as  $T \rightarrow \infty$  (van de Geer et al., 2014). In order to obtain the  
 1461 asymptotics of the score statistic and the Hessian matrix of the log-likelihood function  $\ell(\theta)$ , the conventional  
 1462 law of large numbers (LLN) and the central limit theorem (CLT) can be used, since the process realizations  
 1463 in the log-likelihood decomposition of Eq. (B.2) ( $\mathbf{y}_t | \mathbf{y}_{1:t-1}, \forall t > 1$ ) are independent across time. This is due  
 1464 to the fact that the noise processes  $\mathbf{w}_t$  and  $\mathbf{n}_t$  in our generative model are i.i.d. Gaussian noise sequences  
 1465 and are independent of each other (Anderson and Moore, 2005).

1466 Using the LLN for the Hessian matrix of  $\ell(\cdot)$  yields

$$1467 \left[ \frac{1}{T} \ddot{\ell}(\theta) | H_{(j \rightarrow i), 0} \right] \xrightarrow{\mathbb{P}} \mathbb{E}[\ddot{\ell}_t(\theta)] = -\mathcal{I}(\theta). \quad (\text{B.8})$$

1468 Moreover, the CLT for the score statistics gives

$$1469 \left[ \frac{1}{\sqrt{T}} \dot{\ell}(\theta) | H_{(j \rightarrow i), 0} \right] \xrightarrow{\text{d}} \mathcal{N}(\mathbf{0}, \mathcal{I}(\theta)). \quad (\text{B.9})$$

1470 Using Slutsky's theorem along with Eqs. (B.6), (B.8), and (B.9), asymptotic normality of  $\vartheta$  under the null  
 1471 hypothesis can be obtained as

$$1472 \left[ \sqrt{T}(\vartheta - \theta) | H_{(j \rightarrow i), 0} \right] \xrightarrow{\text{d}} \mathcal{N}(\mathbf{0}, \mathcal{I}(\theta)^{-1}), \quad (\text{B.10})$$

1473 as  $T \rightarrow \infty$ . Following the definition of the deviance in Eq. (B.4) along with Eq. (B.8), we have

$$1474 \left[ \mathcal{D}(\hat{\theta}; \theta) | H_{(j \rightarrow i), 0} \right] \xrightarrow{\text{d}} \chi^2(M), \quad (\text{B.11})$$

1475 as  $T \rightarrow \infty$ , where  $M$  is the dimension of the parameter  $\theta$ . Following the results in (Wald, 1943) and (Wilks,  
 1476 1938) along with the fact that  $\left[ \mathcal{D}_{(j \rightarrow i)}^{db} = \mathcal{D}(\hat{\theta}^f; \theta^f) - \mathcal{D}(\hat{\theta}^r; \theta^r) | H_{(j \rightarrow i), 0} \right]$ , it can be shown that the de-biased  
 1477 deviance difference converges to a central  $\chi^2$  distribution with  $M^d$  degrees of freedom

$$1478 \left[ \mathcal{D}_{(j \rightarrow i)}^{db} | H_{(j \rightarrow i), 0} \right] \xrightarrow{\text{d}} \chi^2(M^d), \quad (\text{B.12})$$

1479 where  $M^d = M^f - M^r$  is the difference between dimensions of the two nested models. This proves the first  
 1480 assertion of Theorem 1. ■

### 1481 *Alternative Hypothesis*

1482 Following the development in (Davidson and Lever, 1970), we define a non-decreasing sequence  $\{T_n\}_{n=1}^{\infty}$   
 1483 such that  $\lim_{n \rightarrow \infty} T_n = T$ . Instead of defining a fixed alternative against the null hypothesis  $H_{(j \rightarrow i), 0} : \theta =$   
 1484  $(\theta_0, \mathbf{0})$ , we instead define a sequence of local alternatives

$$1485 \left\{ H_{(j \rightarrow i), n}^{\{T_n\}} \right\}_{n=1}^{\infty} = \left\{ H_{(j \rightarrow i), 1}^{\{T_n\}} : \theta^{\{T_n\}} = (\theta_0^*, \theta_1^{\{T_n\}}) \right\}_{n=1}^{\infty},$$



1486 where  $\boldsymbol{\theta}_1^{\{T_n\}} = \frac{1}{\sqrt{T_n}} \boldsymbol{\delta}$  is an unspecified sub-vector excluded from the reduced model with dimension  $M^d =$   
 1487  $M^f - M^r$  and  $\boldsymbol{\delta}$  is a constant vector. According to (Davidson and Lever, 1970), we test for the departure  
 1488 of the sequence of local alternatives from the null hypothesis at the true parameter  $\boldsymbol{\theta}^* = (\boldsymbol{\theta}_0^*, \boldsymbol{\theta}_1^*)$  with  
 1489  $\boldsymbol{\theta}_1^* = \lim_{n \rightarrow \infty} \boldsymbol{\theta}_1^{\{T_n\}}$ .

1490 For notational convenience, we hereafter drop the subscript  $n$  in  $T_n$ , noting that the equations involving  
 1491 limits of  $T$  denote sequential limits. Defining the de-biased vector  $\boldsymbol{\vartheta}^{\{T\}} := \widehat{\boldsymbol{\theta}}^{\{T\}} - \boldsymbol{\Theta}^* \dot{\boldsymbol{\ell}}(\widehat{\boldsymbol{\theta}}^{\{T\}})$  corresponding  
 1492 to the local alternative  $H_{(j \rightarrow i),1}^{\{T\}}$  with  $\boldsymbol{\Theta}^* := \ddot{\boldsymbol{\ell}}(\boldsymbol{\theta}^*)^{-1}$  and utilizing the following expansions

$$\begin{aligned} \dot{\boldsymbol{\ell}}(\widehat{\boldsymbol{\theta}}^{\{T\}}) &= \dot{\boldsymbol{\ell}}(\boldsymbol{\theta}^*) + \ddot{\boldsymbol{\ell}}(\boldsymbol{\theta}^*)(\widehat{\boldsymbol{\theta}}^{\{T\}} - \boldsymbol{\theta}^*) + o_{\mathbb{P}}(1/T), \\ \dot{\boldsymbol{\ell}}(\boldsymbol{\theta}^{\{T\}}) &= \dot{\boldsymbol{\ell}}(\boldsymbol{\theta}^*) + \ddot{\boldsymbol{\ell}}(\boldsymbol{\theta}^*)(\boldsymbol{\theta}^{\{T\}} - \boldsymbol{\theta}^*) + o_{\mathbb{P}}(1/T), \end{aligned}$$

1494 we have

$$\boldsymbol{\vartheta}^{\{T\}} - \boldsymbol{\theta}^* = \boldsymbol{\theta}^{\{T\}} - \boldsymbol{\theta}^* - \boldsymbol{\Theta}^* \dot{\boldsymbol{\ell}}(\boldsymbol{\theta}^{\{T\}}) + o_{\mathbb{P}}(1/T). \quad (\text{B.13})$$

1496 Using LLN and CLT similar to the case of the null hypothesis, we conclude

$$\begin{aligned} \left[ \frac{1}{T} \ddot{\boldsymbol{\ell}}(\boldsymbol{\theta}^{\{T\}}) \middle| H_{(j \rightarrow i),1}^T \right] &\xrightarrow{\mathbb{P}} -\boldsymbol{\mathcal{I}}(\boldsymbol{\theta}^*), \\ \left[ \frac{1}{\sqrt{T}} \dot{\boldsymbol{\ell}}(\boldsymbol{\theta}^{\{T\}}) \middle| H_{(j \rightarrow i),1}^T \right] &\xrightarrow{d} \mathcal{N}(\mathbf{0}, \boldsymbol{\mathcal{I}}(\boldsymbol{\theta}^*)), \end{aligned}$$

1498 and the asymptotic normality of  $\boldsymbol{\vartheta}$  follows as

$$\left[ \sqrt{T}(\boldsymbol{\vartheta}^{\{T\}} - \boldsymbol{\theta}^*) \middle| H_{(j \rightarrow i),1}^T \right] \xrightarrow{d} \mathcal{N}(\bar{\boldsymbol{\delta}}, \boldsymbol{\mathcal{I}}(\boldsymbol{\theta}^*)^{-1}), \quad (\text{B.14})$$

1500 where  $\bar{\boldsymbol{\delta}} := [\mathbf{0}^\top, \boldsymbol{\delta}^\top]^\top$  is the asymptotic mean. It is noteworthy that the non-zero asymptotic mean is  
 1501 obtained from the *Pitman drift* rate where the sequence of true local parameters  $\boldsymbol{\theta}^{\{T\}}$  tends to its limit  $\boldsymbol{\theta}^*$   
 1502 at a rate  $\|\boldsymbol{\theta}^{\{T\}} - \boldsymbol{\theta}^*\| = \mathcal{O}(1/\sqrt{T})$  (Davidson and MacKinnon, 1987).

1503 Next, using an extension of *Cochrans theorem* to non-central chi-square distribution (Tan, 1977) and  
 1504 using the asymptotic normality of  $\boldsymbol{\vartheta}^{\{T\}}$  in Eq. (B.14), it follows that under the sequence of local alternatives  
 1505  $H_{(j \rightarrow i),1}^{\{T\}}$ , the de-biased deviance difference of the two nested full and reduced models converges to a non-  
 1506 central chi-squared distribution as  $T \rightarrow \infty$ :

$$\left[ \mathcal{D}_{(j \rightarrow i)}^{db} \middle| H_{(j \rightarrow i),1}^{\{T\}} \right] \xrightarrow{d} \chi^2(M^d, \nu_{(j \rightarrow i)}), \quad (\text{B.15})$$

1508 where  $M^d$  is the difference between the dimensions of the two nested models and  $\nu_{(j \rightarrow i)}$  presents the non-  
 1509 centrality parameter. To identify the non-centrality parameter, let us consider the block decomposition of  
 1510  $\boldsymbol{\mathcal{I}}(\boldsymbol{\theta}^*)$  corresponding to  $\boldsymbol{\theta}_0^*$  and  $\boldsymbol{\theta}_1^*$  as

$$\boldsymbol{\mathcal{I}}(\boldsymbol{\theta}^*) = \begin{pmatrix} \boldsymbol{\mathcal{I}}_{0,0}(\boldsymbol{\theta}^*) & \boldsymbol{\mathcal{I}}_{0,1}(\boldsymbol{\theta}^*) \\ \boldsymbol{\mathcal{I}}_{1,0}(\boldsymbol{\theta}^*) & \boldsymbol{\mathcal{I}}_{1,1}(\boldsymbol{\theta}^*) \end{pmatrix}.$$

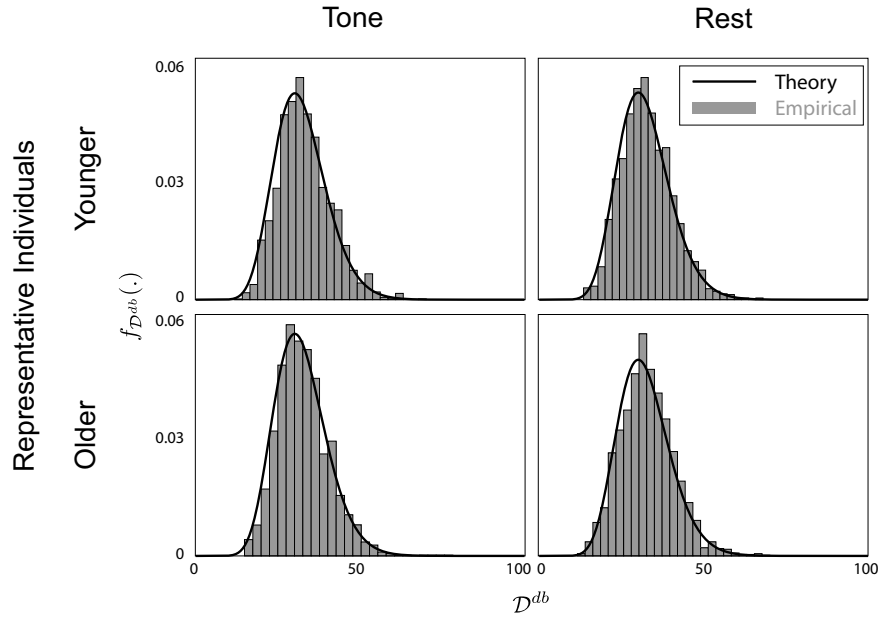

**Figure B.1:** Histograms of the debiased deviance differences corresponding to non-GC links for younger and older representative subjects in tone and rest conditions from Section 2.4. The histograms closely match the prediction of Theorem 1.

1512 Then,  $\nu_{(j \rightarrow i)} := \delta^\top \bar{\mathcal{I}}_{1,1}(\theta^*) \delta$  with  $\bar{\mathcal{I}}_{1,1}(\theta^*) := \mathcal{I}_{1,1}(\theta^*) - \mathcal{I}_{1,0}(\theta^*) \mathcal{I}_{0,0}^{-1}(\theta^*) \mathcal{I}_{0,1}(\theta^*)$ . This proves the second  
 1513 assertion of the theorem. ■

1514 Finally, to test whether the theoretical prediction of Theorem 1 regarding the null distribution is valid  
 1515 for our analysis of experimental MEG data, we chose 4 representative trials (one older and one younger  
 1516 participant in each condition) and plotted the histogram of the debiased deviance differences of all the  
 1517 tested GC links that were not significant. According to Theorem 1, the debiased deviance differences of  
 1518 such non-GC links should follow a chi-square distribution with degree of freedom  $2 \times 4^2 = 32$  ( $r = 4$   
 1519 eigenmodes and VAR(2) model). Fig. B.1 shows the corresponding chi-square density and the empirical  
 1520 histograms. As it can be seen, the empirical histograms closely match the theoretical chi-square density.

## 1521 Appendix C. Mixed-Effects Model

1522 Full models for the mixed effect models included interactions among the fixed effects of age, condition,  
 1523 connectivity type and hemisphere, and random slopes and intercepts for within-subject factors of condition,  
 1524 connectivity type and hemisphere per subject. Summary tables for each frequency band are given in Table  
 1525 C.1.

| Parameter                                            | Delta+Theta Band           | Beta Band                  |
|------------------------------------------------------|----------------------------|----------------------------|
| Count model: (Intercept)                             | 3.06(0.07) <sup>***</sup>  | 2.24(0.10) <sup>***</sup>  |
| Count model: connectivityF->P                        | -0.84(0.11) <sup>***</sup> | -0.10(0.14)                |
| Count model: connectivityF->T                        | -1.29(0.13) <sup>***</sup> | 0.29(0.12) <sup>*</sup>    |
| Count model: connectivityP->F                        | 0.13(0.08)                 | 0.96(0.11) <sup>***</sup>  |
| Count model: connectivityP->P                        | -0.79(0.12) <sup>***</sup> | 1.03(0.11) <sup>***</sup>  |
| Count model: connectivityP->T                        | -0.84(0.11) <sup>***</sup> | 0.86(0.11) <sup>***</sup>  |
| Count model: connectivityT->F                        | -0.29(0.09) <sup>**</sup>  | 0.66(0.12) <sup>***</sup>  |
| Count model: connectivityT->P                        | -1.10(0.12) <sup>***</sup> | -0.02(0.13)                |
| Count model: connectivityT->T                        | -0.97(0.12) <sup>***</sup> | -0.13(0.14)                |
| Count model: AgeOlder                                | -0.16(0.11)                | -0.05(0.16)                |
| Count model: Conditiontone                           | -0.93(0.12) <sup>***</sup> | 0.96(0.11) <sup>***</sup>  |
| Count model: hemi2inter                              | -0.01(0.04)                |                            |
| Count model: connectivityF->P:AgeOlder               | -0.18(0.18)                | -0.10(0.23)                |
| Count model: connectivityF->T:AgeOlder               | 0.25(0.21)                 | -0.30(0.22)                |
| Count model: connectivityP->F:AgeOlder               | 0.05(0.13)                 | -0.07(0.19)                |
| Count model: connectivityP->P:AgeOlder               | 0.26(0.17)                 | -0.29(0.19)                |
| Count model: connectivityP->T:AgeOlder               | -0.46(0.21) <sup>*</sup>   | 0.24(0.18)                 |
| Count model: connectivityT->F:AgeOlder               | 0.12(0.15)                 | -0.42(0.20) <sup>*</sup>   |
| Count model: connectivityT->P:AgeOlder               | 0.26(0.19)                 | -0.25(0.23)                |
| Count model: connectivityT->T:AgeOlder               | 0.14(0.18)                 | -0.03(0.23)                |
| Count model: connectivityF->P:Conditiontone          | 1.86(0.16) <sup>***</sup>  | -0.99(0.19) <sup>***</sup> |
| Count model: connectivityF->T:Conditiontone          | 2.61(0.17) <sup>***</sup>  | -0.88(0.16) <sup>***</sup> |
| Count model: connectivityP->F:Conditiontone          | -0.07(0.16)                | -1.31(0.15) <sup>***</sup> |
| Count model: connectivityP->P:Conditiontone          | 1.39(0.17) <sup>***</sup>  | -1.65(0.15) <sup>***</sup> |
| Count model: connectivityP->T:Conditiontone          | 1.47(0.16) <sup>***</sup>  | -1.60(0.16) <sup>***</sup> |
| Count model: connectivityT->F:Conditiontone          | -0.07(0.17)                | -1.07(0.15) <sup>***</sup> |
| Count model: connectivityT->P:Conditiontone          | 1.13(0.18) <sup>***</sup>  | -0.82(0.17) <sup>***</sup> |
| Count model: connectivityT->T:Conditiontone          | 0.91(0.19) <sup>***</sup>  | -0.82(0.18) <sup>***</sup> |
| Count model: AgeOlder:Conditiontone                  | -0.50(0.22) <sup>*</sup>   | -0.57(0.19) <sup>**</sup>  |
| Count model: Conditiontone:hemi2inter                | -0.32(0.06) <sup>***</sup> |                            |
| Count model: connectivityF->P:AgeOlder:Conditiontone | 0.51(0.29)                 | 1.57(0.29) <sup>***</sup>  |
| Count model: connectivityF->T:AgeOlder:Conditiontone | 0.30(0.30)                 | 0.46(0.33)                 |
| Count model: connectivityP->F:AgeOlder:Conditiontone | 0.72(0.28) <sup>*</sup>    | 0.22(0.26)                 |
| Count model: connectivityP->P:AgeOlder:Conditiontone | 0.64(0.28) <sup>*</sup>    | 0.90(0.26) <sup>***</sup>  |
| Count model: connectivityP->T:AgeOlder:Conditiontone | 1.20(0.31) <sup>***</sup>  | 0.43(0.26)                 |
| Count model: connectivityT->F:AgeOlder:Conditiontone | 1.02(0.29) <sup>***</sup>  | 0.77(0.26) <sup>**</sup>   |
| Count model: connectivityT->P:AgeOlder:Conditiontone | 0.40(0.32)                 | 0.26(0.32)                 |
| Count model: connectivityT->T:AgeOlder:Conditiontone | 0.67(0.32) <sup>*</sup>    | 1.03(0.29) <sup>***</sup>  |
| Zero model: (Intercept)                              | -3.49(0.22) <sup>***</sup> | -3.31(0.18) <sup>***</sup> |
| AIC                                                  | 10122.64                   | 10803.40                   |
| Log Likelihood                                       | -5020.32                   | -5362.70                   |
| Num. obs.                                            | 1584                       | 1584                       |
| Num. groups: MEG_ID                                  | 22                         | 22                         |
| Var (count model): MEG_ID (Intercept)                | 0.01                       | 0.01                       |

\*\*\* $p < 0.001$ ; \*\* $p < 0.01$ ; \* $p < 0.05$

**Table C.1:** Statistical model summary table corresponding to Section 2.4.
